# Supplementary material for: Reaction mechanism of the PuDddK dimethylsulfoniopropionate lyase and cofactor effects of various transition metal ions
Source: Royal Society of Chemistry journal article supplement (doi:10.1039/d2dt02133a), 2022-01-01
Supplement: d2dt02133a1.pdf [file d2dt02133a1.pdf]

**Electronic Supplementary Information to:**

**Reaction mechanism for the *Pu*DddK dimethylsulfoniopropionate lyase and cofactor effects of various transition metal ions**

Ying Wang and Shi-Lu Chen\*

*Key Laboratory of Cluster Science of Ministry of Education, School of Chemistry and Chemical Engineering, Beijing Institute of Technology, Beijing 100081, China*

\*E-mail: shlchen@bit.edu.cn

**Contents:**

1. Supplementary tables, figures, and scheme
2. Cartesian coordinates of optimized structures

*1. Supplementary tables and figures*

**Table S1** Properties of the enzyme-substrate complexes with various divalent transition metal ions as cofactors in different electronic states.

| metal            | multiplicity | spin in metal | energy (kcal/mol) |
|------------------|--------------|---------------|-------------------|
| Ni <sup>2+</sup> | 3            | 1.69          | 0.0               |
|                  | 1            | -0.02         | 19.1              |
| Mn <sup>2+</sup> | 6            | 4.82          | 0.0               |
|                  | 4            | 2.98          | 37.9              |
|                  | 2            | 1.04          | 52.6              |
| Fe <sup>2+</sup> | 5            | 3.76          | 0.0               |
|                  | 3            | 1.99          | 18.9              |
|                  | 1            | 0.00          | 32.6              |
| Co <sup>2+</sup> | 4            | 2.75          | 0.0               |
|                  | 2            | 0.97          | 20.4              |

**Table S2** Properties of the enzyme-substrate complexes with a ferric ion as the cofactor in various electronic states. Both monodentate ( $\text{Fe}_M^{3+}$ ) and bidentate ( $\text{Fe}_B^{3+}$ ) bindings of DMSP were obtained.

| multiplicity | spin               |       | energy<br>(kcal mol <sup>-1</sup> ) |
|--------------|--------------------|-------|-------------------------------------|
|              | $\text{Fe}_M^{3+}$ | Tyr64 |                                     |
| 6            | 3.97               | 0.57  | 0                                   |
| 4            | 3.76               | -0.97 | 9.5                                 |
| 2            | 0.91               | 0.09  | 28.9                                |

  

| multiplicity | spin               |       | energy<br>(kcal mol <sup>-1</sup> ) |
|--------------|--------------------|-------|-------------------------------------|
|              | $\text{Fe}_B^{3+}$ | Tyr64 |                                     |
| 6            | 3.76               | 1.01  | 10.7                                |
| 4            | 3.76               | -1.01 | 10.8                                |
| 4            | 1.99               | 1.01  | 30.1                                |
| 2            | 1.99               | -1.01 | 30.5                                |
| 2            | -0.00              | 1.01  | 32.0                                |

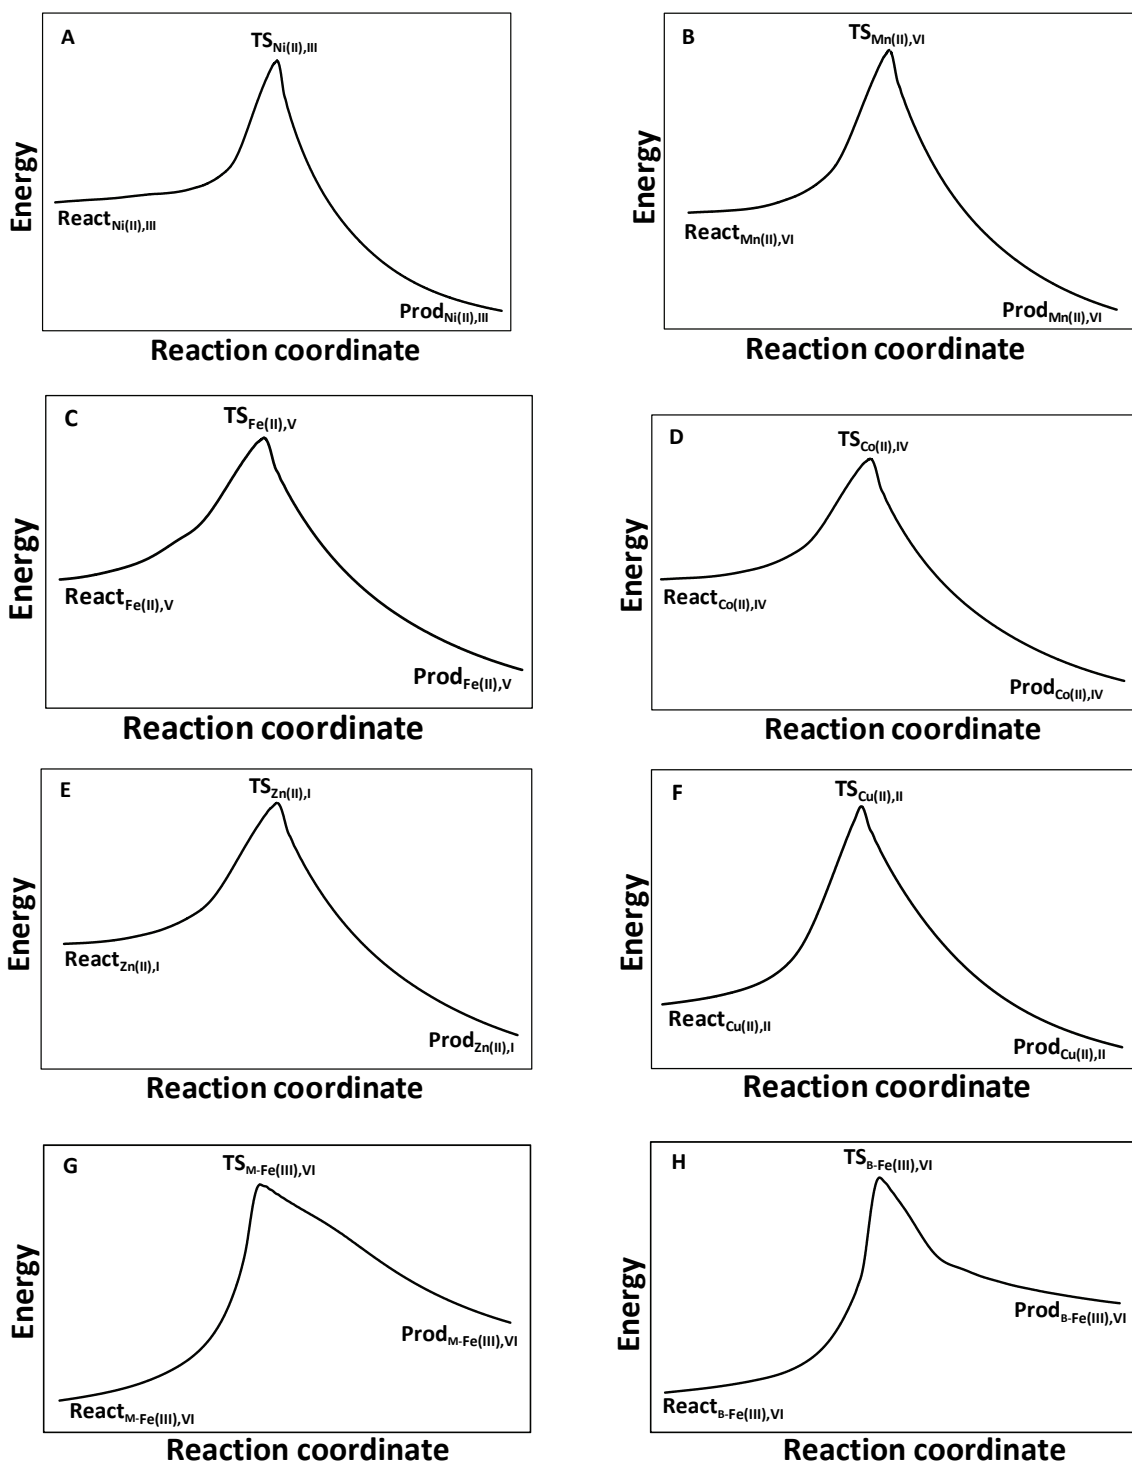

**Fig. S1** Schematic potential energy surfaces obtained by the IRC (intrinsic reaction coordinate) calculations with the transition state structures as the starting points. The results with various metal ions are given, including  $\text{Ni}^{2+}$  (A),  $\text{Mn}^{2+}$  (B),  $\text{Fe}^{2+}$  (C),  $\text{Co}^{2+}$  (D),  $\text{Zn}^{2+}$  (E),  $\text{Cu}^{2+}$  (F),  $\text{Fe}_M^{3+}$  (G), and  $\text{Fe}_B^{3+}$  (H).

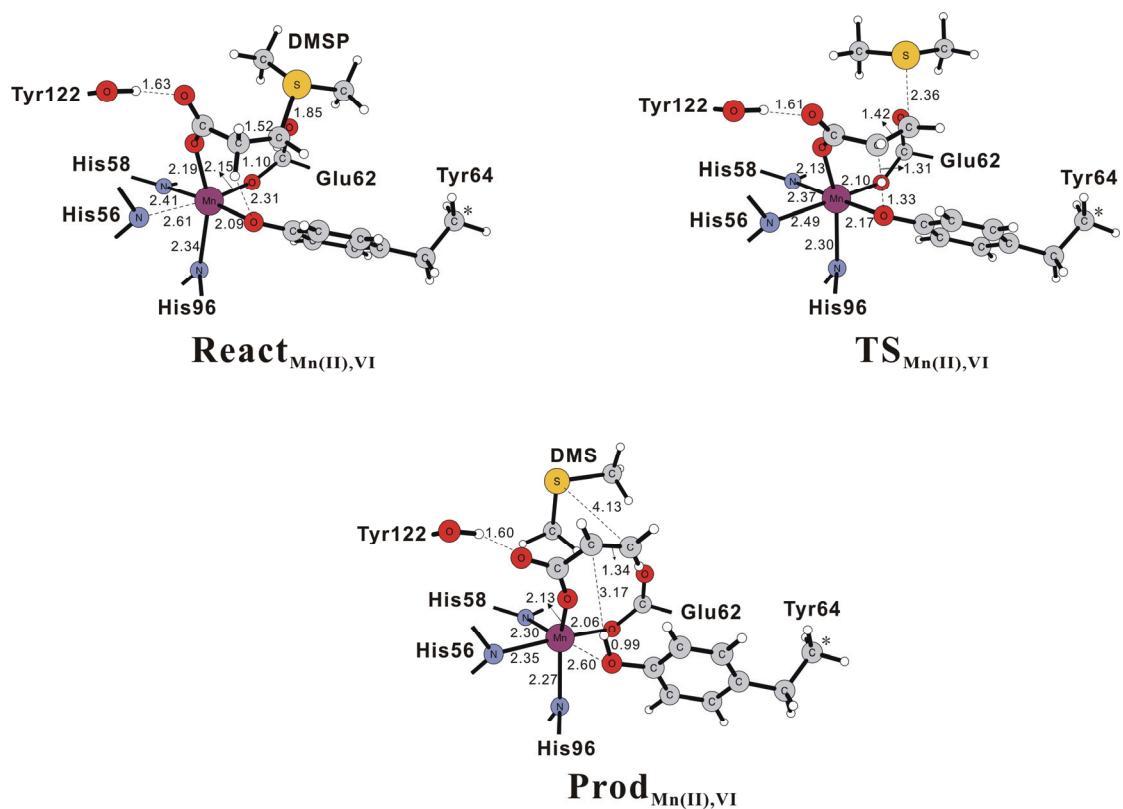

**Fig. S2** Optimized structures of stationary points in the  $\text{Mn}^{2+}$ -dependent *PuDddK*-catalyzed decomposition of DMSP.

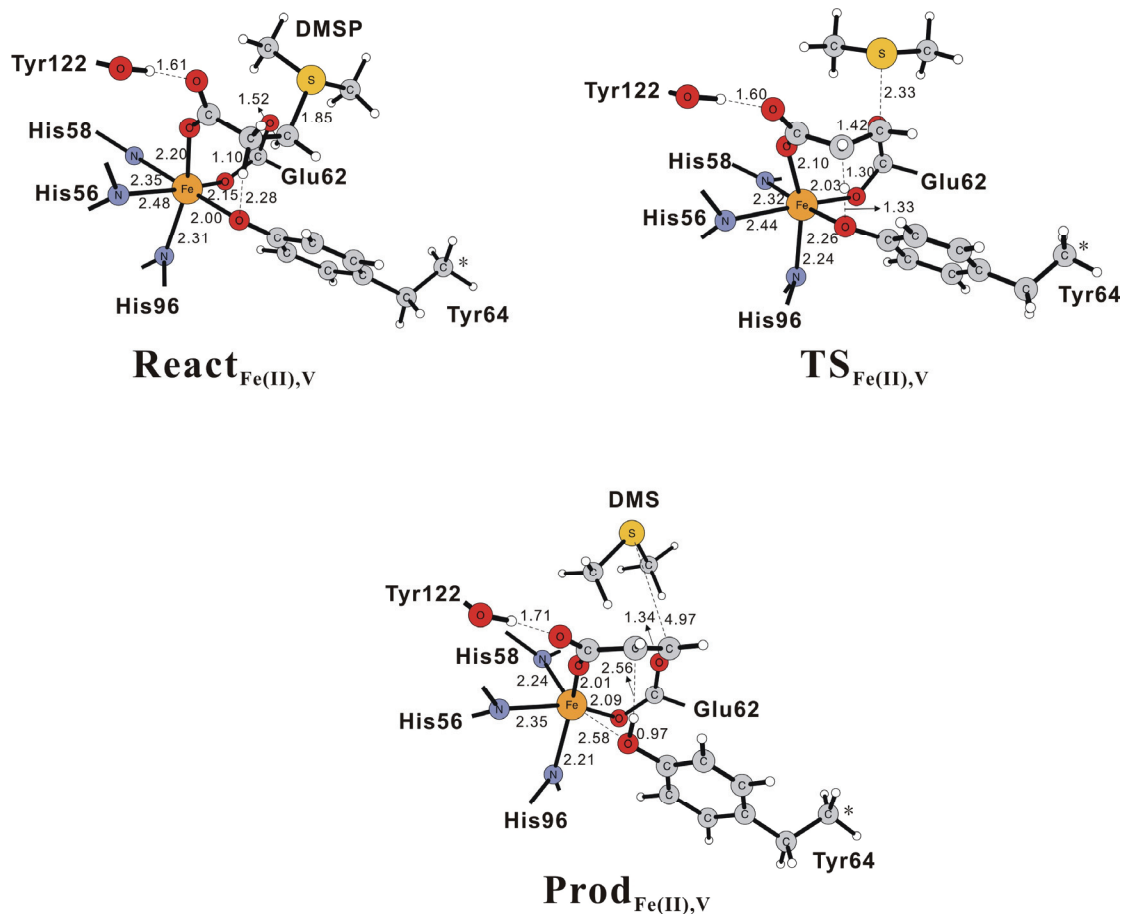

**Fig. S3** Optimized structures of stationary points in the  $\text{Fe}^{2+}$ -dependent *Pu*DddK-catalyzed decomposition of DMSP.

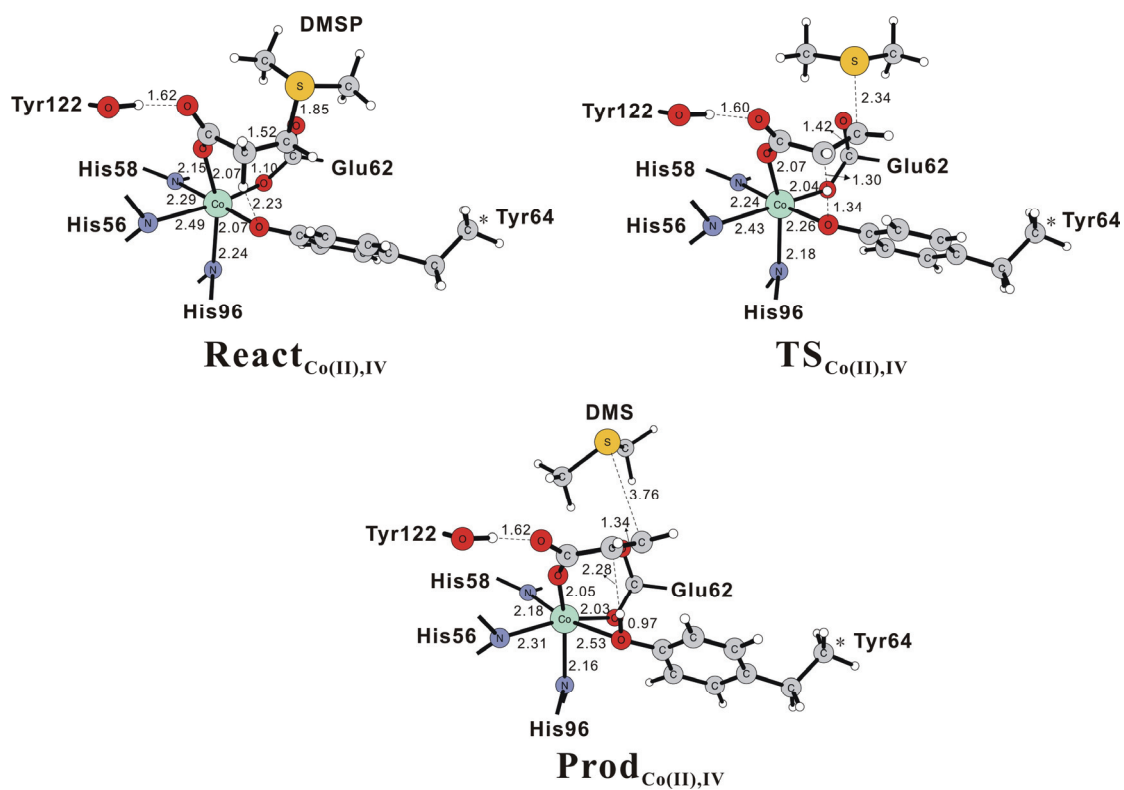

**Fig. S4** Optimized structures of stationary points in the  $\text{Co}^{2+}$ -dependent *Pu*DddK-catalyzed decomposition of DMSP.

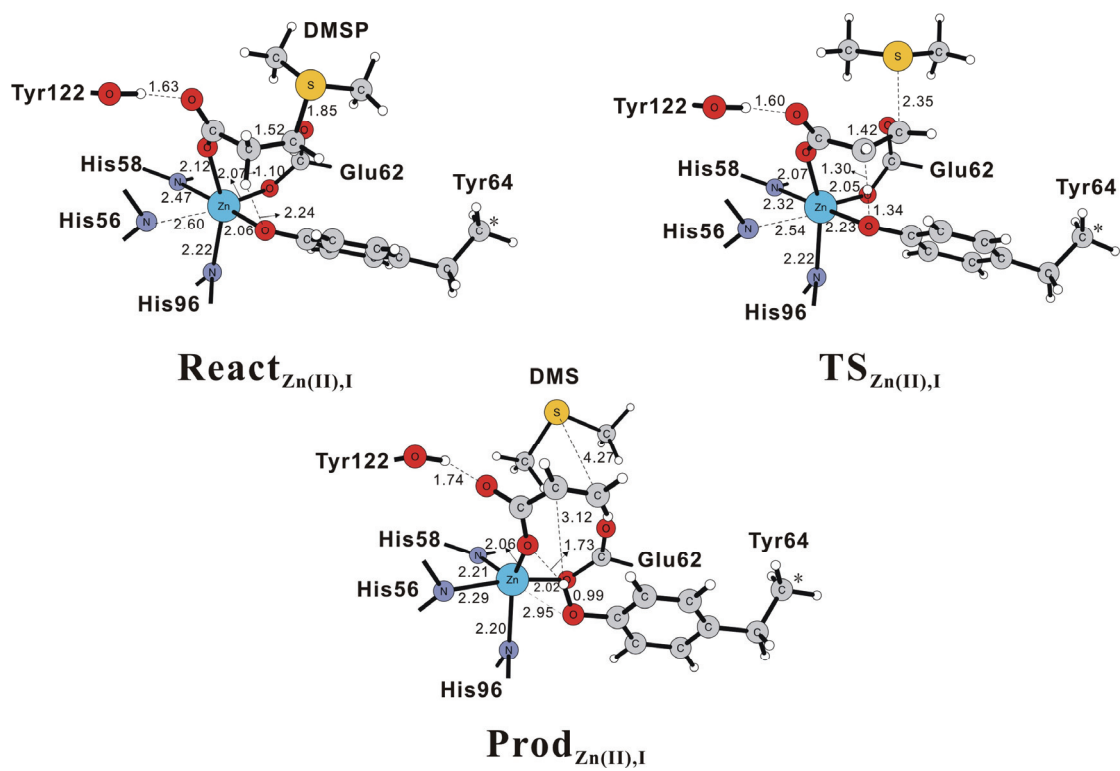

**Fig. S5** Optimized structures of stationary points in the Zn<sup>2+</sup>-dependent *Pu*DddK-catalyzed decomposition of DMSP.



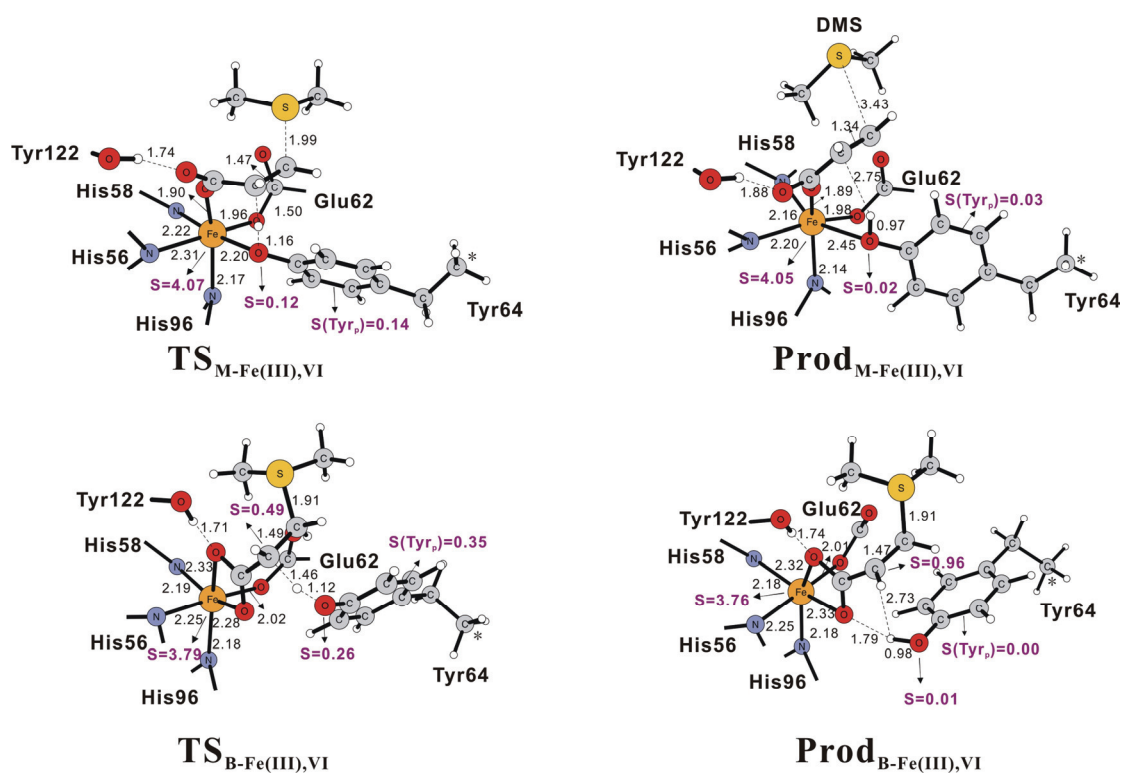

**Fig. S6** Optimized structures of stationary points in the  $\text{Fe}^{3+}$ -dependent *Pu*DddK-catalyzed decomposition of DMSP.

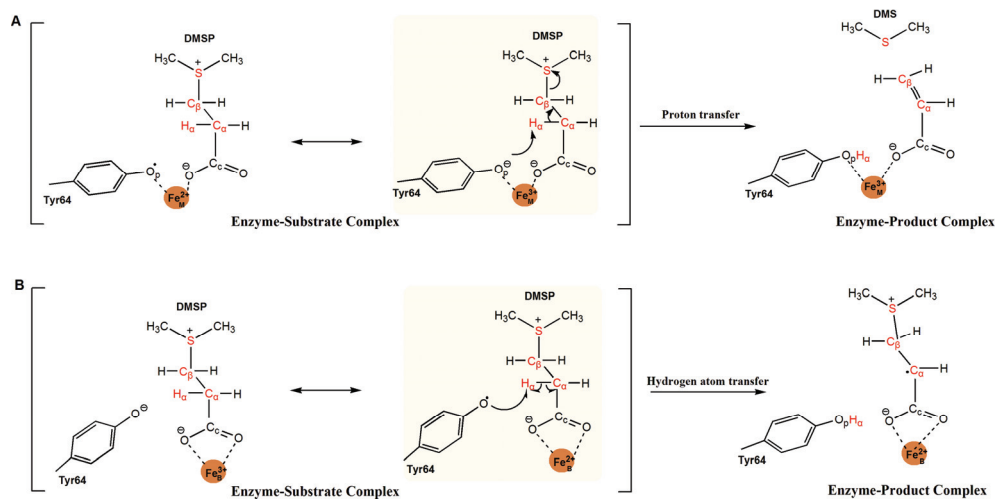

**Scheme S1** Possible reaction mechanisms for  $\text{Fe}^{3+}$ -dependent *Pu*DddK. (A) A monodentate DMSP coordination with  $\text{Fe}_M^{3+}$ . (B) A bidentate DMSP coordination with  $\text{Fe}_B^{3+}$ .

## 2. Cartesian coordinates of optimized structures

The abbreviations used here are consistent with those in the text.

### React<sub>Ni(II),III</sub>

|   |               |                |               |
|---|---------------|----------------|---------------|
| C | -5.8569950000 | -37.2389910000 | 19.1709910000 |
| C | -5.1610471129 | -35.8835948910 | 19.3940518877 |
| C | -5.5113866992 | -34.8144760147 | 18.4045777177 |
| N | -5.2618840027 | -34.9226640178 | 17.0464836950 |
| C | -5.9850239465 | -33.5353385983 | 18.5660988236 |
| C | -5.5638874436 | -33.7306862478 | 16.4637426791 |
| N | -5.9988404308 | -32.8583191941 | 17.3580504153 |
| C | -0.1150060000 | -33.2509900000 | 20.8939940000 |
| C | -0.6468651623 | -33.2813323942 | 19.4444356361 |
| C | -1.7790898426 | -32.3375354905 | 19.1501694809 |
| N | -1.8205282749 | -31.0333008990 | 19.6258160493 |
| C | -2.8983887631 | -32.4483634785 | 18.3568122060 |
| C | -2.9231929129 | -30.4228955995 | 19.1125967359 |
| N | -3.5959324007 | -31.2558950244 | 18.3396795565 |
| C | -3.1080190000 | -25.0239970000 | 19.3379980000 |
| C | -3.3172666983 | -26.4573258093 | 18.8584367558 |
| C | -3.5734267091 | -26.5124712746 | 17.3524855863 |
| C | -3.7533000460 | -27.9264996795 | 16.8074475216 |
| O | -3.2265492972 | -28.2024677549 | 15.7030572720 |
| O | -4.4676116973 | -28.6978063883 | 17.5276781324 |
| C | -8.1409660000 | -23.1040170000 | 14.9750030000 |
| C | -8.8648585996 | -24.1861458951 | 15.8263312073 |
| C | -8.2824026337 | -25.5998245068 | 15.8913335758 |
| C | -7.5044824979 | -26.0357571279 | 16.9799802710 |
| C | -8.6185845571 | -26.5911295463 | 14.9532104944 |
| C | -7.0784971861 | -27.3578641117 | 17.1308026975 |
| C | -8.1996703685 | -27.9189590757 | 15.0841223850 |
| C | -7.3951890831 | -28.3613785459 | 16.1742500293 |
| O | -7.0106990841 | -29.6269723348 | 16.2571634837 |
| C | -9.7309990000 | -33.4130130000 | 20.3670160000 |
| C | -9.7234109228 | -31.8658470853 | 20.3892806653 |
| C | -8.3953320002 | -31.2607909316 | 20.0440605202 |
| N | -7.3398249978 | -31.1562319848 | 20.9466955866 |
| C | -7.8820380087 | -30.7981103793 | 18.8593139645 |
| C | -6.2571101425 | -30.6585503975 | 20.2836094681 |
| N | -6.5561604688 | -30.4444453233 | 19.0181725452 |
| C | 0.6729850000  | -36.5289920000 | 17.1749980000 |
| C | -0.8080379382 | -36.8060518306 | 17.4845024771 |
| C | -1.7423889437 | -36.2698180116 | 16.4191157971 |

|   |               |                |               |
|---|---------------|----------------|---------------|
| C | -1.7545213222 | -34.9049898948 | 16.0913135405 |
| C | -2.6040316139 | -37.1113773720 | 15.7052175253 |
| C | -2.5868361637 | -34.3900225044 | 15.1034809259 |
| C | -3.4463323211 | -36.6184925591 | 14.7048502617 |
| C | -3.4452611608 | -35.2500373890 | 14.3923274831 |
| O | -4.3052037141 | -34.8071899018 | 13.4533729038 |
| C | -5.4125764043 | -28.9637573825 | 13.6920139364 |
| C | -5.8819077776 | -30.4081310649 | 13.6347544730 |
| C | -4.8279554254 | -31.3600766947 | 14.2048144048 |
| O | -4.4858279020 | -31.2286388936 | 15.4157808283 |
| O | -4.3264525008 | -32.2005038316 | 13.4009079965 |
| H | -5.4040399443 | -35.5022817620 | 20.3924945856 |
| H | -4.0713748492 | -36.0360616568 | 19.3817146306 |
| H | -6.2803904922 | -33.0587061288 | 19.4858071336 |
| H | -5.4223510254 | -33.5474524006 | 15.4135925114 |
| H | -5.5524436352 | -37.9624159153 | 19.9343507538 |
| H | 0.1891733103  | -33.0776687619 | 18.7588715251 |
| H | -0.9908711114 | -34.2912526640 | 19.2013080107 |
| H | -3.2269855498 | -33.2954494637 | 17.7780372342 |
| H | -3.1942064327 | -29.3932466144 | 19.2832036047 |
| H | 0.6781572229  | -33.9931820294 | 21.0227352041 |
| H | -4.1637625390 | -26.9217277628 | 19.3764475937 |
| H | -2.4288852331 | -27.0598786688 | 19.0996770648 |
| H | -4.5028401202 | -25.9723509194 | 17.1222401313 |
| H | -2.7599378823 | -26.0262003020 | 16.8029453834 |
| H | -2.2507830009 | -24.5592306500 | 18.8362763506 |
| H | -8.9444412687 | -23.8043271506 | 16.8529018424 |
| H | -9.8980063594 | -24.2593314934 | 15.4596856377 |
| H | -7.2429111013 | -25.3186325046 | 17.7591248811 |
| H | -9.2587753178 | -26.3283136676 | 14.1105262353 |
| H | -6.4788299056 | -27.6488783484 | 17.9843224117 |
| H | -8.5186295569 | -28.6603325757 | 14.3531895572 |
| H | -8.0796068822 | -23.4069171595 | 13.9234094249 |
| H | 10.0554192680 | -31.5084256615 | 21.3738333243 |
| H | 10.4554669489 | -31.4905964130 | 19.6666373478 |
| H | -8.3344006041 | -30.7097693219 | 17.8838876684 |
| H | -5.2899583898 | -30.5039301547 | 20.7367057849 |
| H | 10.7307261353 | -33.7984164165 | 20.5908648171 |
| H | -1.0576045461 | -36.3683109015 | 18.4625337244 |
| H | -0.9617786841 | -37.8865330366 | 17.5937261461 |
| H | -2.6160106894 | -38.1767407689 | 15.9281515550 |
| H | -1.1070280098 | -34.2174830223 | 16.6303110009 |
| H | -4.1096218066 | -37.2768643424 | 14.1515395131 |
| H | -2.6204959785 | -33.3245979593 | 14.8977526577 |

|    |               |                |               |
|----|---------------|----------------|---------------|
| H  | -4.2681106250 | -33.8123376616 | 13.3979636820 |
| H  | 0.8699216149  | -35.4540717102 | 17.1058186882 |
| H  | -5.0050167726 | -28.7239850216 | 14.6738597075 |
| H  | -6.2015437825 | -28.2573519904 | 13.4239001628 |
| H  | -6.7445177427 | -30.4316492061 | 14.3113676457 |
| H  | -6.1652595418 | -30.7201398718 | 12.6259156787 |
| H  | -4.8242866418 | -35.7000822144 | 16.5648815373 |
| H  | -7.3819770723 | -31.3728726001 | 21.9311832975 |
| H  | -1.1362804011 | -30.5993989138 | 20.2258444538 |
| H  | -8.6808301397 | -22.1520603847 | 15.0266370535 |
| H  | -7.1186900951 | -22.9400221399 | 15.3346090885 |
| H  | -3.9884422796 | -24.4074242294 | 19.1210632135 |
| H  | -2.9268164159 | -24.9743140127 | 20.4181767973 |
| H  | 0.9577520198  | -36.9780544450 | 16.2180197598 |
| H  | 1.3251400162  | -36.9392447100 | 17.9543774796 |
| H  | -5.5987264696 | -37.6589594103 | 18.1922924279 |
| H  | -6.9456024726 | -37.1310431838 | 19.2108509760 |
| H  | -9.4235318583 | -33.7815459542 | 19.3839352724 |
| H  | -9.0344650337 | -33.8227452386 | 21.1073497478 |
| S  | -4.0642284910 | -28.5881709094 | 12.4786716772 |
| C  | -2.6190489716 | -29.5248936347 | 13.0871684168 |
| C  | -3.6375587671 | -26.8971713005 | 13.0078223765 |
| H  | -2.8299099945 | -26.5400568981 | 12.3651556776 |
| H  | -4.5290750243 | -26.2818754846 | 12.8682623255 |
| H  | -3.3437209267 | -26.9483279036 | 14.0623646463 |
| H  | -2.5933138350 | -29.4300998600 | 14.1760142311 |
| H  | -2.7539874694 | -30.5600345220 | 12.7709447171 |
| H  | -1.7414771541 | -29.0794796610 | 12.6125952865 |
| H  | 0.3107110877  | -32.2737795853 | 21.1508432066 |
| H  | -0.9123722705 | -33.4707413357 | 21.6112095478 |
| Ni | -5.3846009250 | -30.4992840362 | 17.1932673827 |

### TS<sub>Ni(II),III</sub>

|   |                |                 |                |
|---|----------------|-----------------|----------------|
| C | -5.8569950000# | -37.2389910000# | 19.1709910000# |
| C | -5.2106010000# | -35.8671510000# | 19.4360040000# |
| C | -5.5610530000# | -34.7876760000# | 18.4572330000# |
| N | -5.3628540000# | -34.9055690000# | 17.0910220000# |
| C | -5.9706990000# | -33.4876280000# | 18.6336680000# |
| C | -5.6301220000# | -33.7028180000# | 16.5159050000# |
| N | -5.9937750000# | -32.8118440000  | 17.4236830000  |
| C | -0.1150060000  | -33.2509900000  | 20.8939940000  |
| C | -0.6350020000  | -33.2351560000  | 19.4423910000  |
| C | -1.7718270000  | -32.2924670000  | 19.1729720000  |
| N | -1.8023760000  | -30.9860900000  | 19.6439410000  |

|   |               |                |               |
|---|---------------|----------------|---------------|
| C | -2.9104660000 | -32.4102020000 | 18.4098190000 |
| C | -2.9169700000 | -30.3788740000 | 19.1567050000 |
| N | -3.6087990000 | -31.2178570000 | 18.4072950000 |
| C | -3.1080190000 | -25.0239970000 | 19.3379980000 |
| C | -3.2804130000 | -26.4659040000 | 18.8672300000 |
| C | -3.4818910000 | -26.5589490000 | 17.3529740000 |
| C | -3.6546300000 | -27.9931310000 | 16.8521240000 |
| O | -3.0113170000 | -28.3651980000 | 15.8493170000 |
| O | -4.4949960000 | -28.6852450000 | 17.5280910000 |
| C | -8.1409660000 | -23.1040170000 | 14.9750030000 |
| C | -8.7694890000 | -24.1461250000 | 15.9335740000 |
| C | -8.1955920000 | -25.5604490000 | 15.9293330000 |
| C | -7.5317790000 | -26.0865500000 | 17.0515950000 |
| C | -8.4060980000 | -26.4455240000 | 14.8611640000 |
| C | -7.1016640000 | -27.4134490000 | 17.1202360000 |
| C | -7.9879500000 | -27.7797720000 | 14.9125230000 |
| C | -7.3256620000 | -28.3027330000 | 16.0488920000 |
| O | -6.9502910000 | -29.6038980000 | 16.0811840000 |
| C | -9.7309990000 | -33.4130130000 | 20.3670160000 |
| C | -9.8150490000 | -31.8780160000 | 20.1958030000 |
| C | -8.4998520000 | -31.2275660000 | 19.8893640000 |
| N | -7.5040880000 | -31.0254230000 | 20.8415440000 |
| C | -7.9403270000 | -30.8055280000 | 18.7106890000 |
| C | -6.4081970000 | -30.5142200000 | 20.2131800000 |
| N | -6.6421510000 | -30.3817350000 | 18.9227310000 |
| C | 0.6729850000  | -36.5289920000 | 17.1749980000 |
| C | -0.8077480000 | -36.7539000000 | 17.5248560000 |
| C | -1.7600420000 | -36.2047410000 | 16.4822300000 |
| C | -1.7728460000 | -34.8390870000 | 16.1554660000 |
| C | -2.6448140000 | -37.0400320000 | 15.7884350000 |
| C | -2.6280490000 | -34.3163000000 | 15.1895270000 |
| C | -3.5064650000 | -36.5409750000 | 14.8081670000 |
| C | -3.5056730000 | -35.1708040000 | 14.4939480000 |
| O | -4.3846740000 | -34.7298190000 | 13.5761920000 |
| C | -5.1171730000 | -28.8582140000 | 13.6777170000 |
| C | -5.7570110000 | -30.1166400000 | 13.8021330000 |
| C | -4.8852340000 | -31.2573370000 | 14.3037070000 |
| O | -4.4566580000 | -31.2400840000 | 15.4995540000 |
| O | -4.6103970000 | -32.1516410000 | 13.4575370000 |
| H | -5.4898850000 | -35.5112880000 | 20.4338950000 |
| H | -4.1174690000 | -35.9891360000 | 19.4500280000 |
| H | -6.2078660000 | -32.9931210000 | 19.5615570000 |
| H | -5.5204560000 | -33.5227340000 | 15.4611370000 |
| H | -5.5551160000 | -37.9619790000 | 19.9348280000 |

|   |                |                |               |
|---|----------------|----------------|---------------|
| H | 0.2024830000   | -33.0014940000 | 18.7692250000 |
| H | -0.9706790000  | -34.2375660000 | 19.1631570000 |
| H | -3.2533290000  | -33.2596940000 | 17.8436880000 |
| H | -3.1822690000  | -29.3484770000 | 19.3282790000 |
| H | 0.6879270000   | -33.9856600000 | 21.0015620000 |
| H | -4.1397530000  | -26.9325710000 | 19.3615120000 |
| H | -2.3936700000  | -27.0515730000 | 19.1520140000 |
| H | -4.3966070000  | -26.0154930000 | 17.0782560000 |
| H | -2.6436980000  | -26.0988690000 | 16.8201560000 |
| H | -2.2416740000  | -24.5526200000 | 18.8597550000 |
| H | -8.7095970000  | -23.7539310000 | 16.9563820000 |
| H | -9.8422250000  | -24.2101150000 | 15.7040280000 |
| H | -7.3582400000  | -25.4414410000 | 17.9118070000 |
| H | -8.9413760000  | -26.0996250000 | 13.9783100000 |
| H | -6.5764300000  | -27.7844840000 | 17.9896980000 |
| H | -8.2076430000  | -28.4460430000 | 14.0828250000 |
| H | -8.2124210000  | -23.4338350000 | 13.9329040000 |
| H | -10.2563200000 | -31.4301580000 | 21.0964590000 |
| H | -10.4970840000 | -31.6420930000 | 19.3729030000 |
| H | -8.3447660000  | -30.8023950000 | 17.7107770000 |
| H | -5.4764730000  | -30.2893880000 | 20.7090220000 |
| H | -10.7242950000 | -33.8366690000 | 20.5430370000 |
| H | -1.0148430000  | -36.2990460000 | 18.5044690000 |
| H | -0.9911570000  | -37.8274450000 | 17.6521450000 |
| H | -2.6585380000  | -38.1050230000 | 16.0113810000 |
| H | -1.1071820000  | -34.1563790000 | 16.6771670000 |
| H | -4.1830480000  | -37.1949940000 | 14.2664220000 |
| H | -2.6637740000  | -33.2483980000 | 14.9971510000 |
| H | -4.3853450000  | -33.7293550000 | 13.5276040000 |
| H | 0.8988300000   | -35.4617870000 | 17.0809800000 |
| H | -4.4792500000  | -28.5314420000 | 14.4936800000 |
| H | -5.6064250000  | -28.0793180000 | 13.0995860000 |
| H | -6.4559190000  | -29.8635020000 | 14.8530470000 |
| H | -6.3878570000  | -30.4178170000 | 12.9647530000 |
| H | -4.9628900000  | -35.6958160000 | 16.5979150000 |
| H | -7.5922430000  | -31.1953460000 | 21.8318600000 |
| H | -1.1002720000  | -30.5476150000 | 20.2192570000 |
| H | -8.6556400000  | -22.1417910000 | 15.0641430000 |
| H | -7.0804710000  | -22.9515910000 | 15.2022430000 |
| H | -3.9893200000  | -24.4233650000 | 19.0843040000 |
| H | -2.9642620000  | -24.9619520000 | 20.4227070000 |
| H | 0.9196740000   | -37.0022720000 | 16.2194970000 |
| H | 1.3306500000   | -36.9453850000 | 17.9459530000 |
| H | -5.5508550000  | -37.6376800000 | 18.1976420000 |

|    |               |                |               |
|----|---------------|----------------|---------------|
| H  | -6.9489670000 | -37.1663680000 | 19.1743910000 |
| H  | -9.3036060000 | -33.8745710000 | 19.4721470000 |
| H  | -9.0926180000 | -33.6820020000 | 21.2160290000 |
| S  | -3.1715570000 | -28.9091750000 | 12.2817110000 |
| C  | -2.1441030000 | -30.0528240000 | 13.2680270000 |
| C  | -2.5094840000 | -27.3119460000 | 12.8678250000 |
| H  | -1.4927600000 | -27.1760000000 | 12.4894830000 |
| H  | -3.1510980000 | -26.5230190000 | 12.4671630000 |
| H  | -2.5229850000 | -27.3010720000 | 13.9616250000 |
| H  | -2.3158970000 | -29.8653630000 | 14.3303930000 |
| H  | -2.4581080000 | -31.0635590000 | 13.0045960000 |
| H  | -1.0954190000 | -29.8973600000 | 13.0008260000 |
| H  | 0.2941690000  | -32.2782760000 | 21.1907620000 |
| H  | -0.9139330000 | -33.5079880000 | 21.5966490000 |
| Ni | -5.3238320000 | -30.5135640000 | 17.2279540000 |

### TS<sub>Ni(II),III</sub>

|   |               |                |               |
|---|---------------|----------------|---------------|
| C | -5.8569950000 | -37.2389910000 | 19.1709910000 |
| C | -4.9645927747 | -35.9872542404 | 19.2589726036 |
| C | -5.3314257084 | -34.8687881887 | 18.3316446400 |
| N | -5.1796707627 | -34.9425403089 | 16.9562009782 |
| C | -5.7274796427 | -33.5759964641 | 18.5654212538 |
| C | -5.4452266129 | -33.7228525531 | 16.4264871888 |
| N | -5.7770983304 | -32.8629934589 | 17.3781932846 |
| C | -0.1150060000 | -33.2509900000 | 20.8939940000 |
| C | -0.3763698149 | -32.9976254972 | 19.3950536536 |
| C | -1.5770881057 | -32.1446153999 | 19.1214086533 |
| N | -1.7245538357 | -30.8685631116 | 19.6523881100 |
| C | -2.7116907608 | -32.3413350563 | 18.3728771952 |
| C | -2.8951874674 | -30.3492725805 | 19.2080294438 |
| N | -3.5184881694 | -31.2219199650 | 18.4393174074 |
| C | -3.1080190000 | -25.0239970000 | 19.3379980000 |
| C | -3.2547863866 | -26.4884996613 | 18.9412395817 |
| C | -3.7264249102 | -26.6690424529 | 17.4893852552 |
| C | -3.7279328602 | -28.1612854814 | 17.1729962640 |
| O | -2.7037889853 | -28.6906612464 | 16.7103852420 |
| O | -4.8097216330 | -28.7687500250 | 17.5277835791 |
| C | -8.1409660000 | -23.1040170000 | 14.9750030000 |
| C | -8.8888014044 | -24.1388264016 | 15.8475684009 |
| C | -8.3392118122 | -25.5612746776 | 15.8468835622 |
| C | -7.9695921642 | -26.2009636699 | 17.0407959943 |
| C | -8.2507676521 | -26.3150762463 | 14.6675493296 |
| C | -7.5337145481 | -27.5287181492 | 17.0725044283 |
| C | -7.8248129260 | -27.6452641409 | 14.6793502641 |



|   |               |                |               |
|---|---------------|----------------|---------------|
| C | -7.4633934129 | -28.2563789773 | 15.8857709343 |
| O | -7.0639923927 | -29.5857572619 | 15.9245474145 |
| C | -9.7309990000 | -33.4130130000 | 20.3670160000 |
| C | -9.7776138617 | -31.8707160521 | 20.3178246007 |
| C | -8.4531563831 | -31.2713500164 | 19.9613208201 |
| N | -7.4389927423 | -31.0513404945 | 20.8857867028 |
| C | -7.8930103786 | -30.9527124640 | 18.7513564347 |
| C | -6.3331982154 | -30.6218025548 | 20.2173690906 |
| N | -6.5809870370 | -30.5644178627 | 18.9242725800 |
| C | 0.6729850000  | -36.5289920000 | 17.1749980000 |
| C | -0.8255372241 | -36.6725817586 | 17.4908336919 |
| C | -1.7188926253 | -36.1555098353 | 16.3813681172 |
| C | -1.6978842077 | -34.8011100248 | 16.0106751881 |
| C | -2.5786800613 | -37.0031713771 | 15.6723461654 |
| C | -2.5162169059 | -34.2958748160 | 15.0059786087 |
| C | -3.4058079840 | -36.5207616911 | 14.6539406744 |
| C | -3.3947582982 | -35.1562875376 | 14.3178312165 |
| O | -4.2655834074 | -34.7206211400 | 13.3917360168 |
| C | -4.6203202846 | -28.6832890456 | 13.9299467552 |
| C | -5.0529668960 | -29.8783999214 | 13.5083938504 |
| C | -4.6552199212 | -31.1632465096 | 14.1746091731 |
| O | -4.4847874477 | -31.2028601100 | 15.4376761183 |
| O | -4.4887772893 | -32.1393012424 | 13.3961884759 |
| H | -4.9857516881 | -35.5908277412 | 20.2805607537 |
| H | -3.9214827809 | -36.2741302869 | 19.0616507949 |
| H | -5.9288444088 | -33.1032179352 | 19.5134888170 |
| H | -5.3459587555 | -33.4905591091 | 15.3800109504 |
| H | -5.5191612537 | -38.0057363156 | 19.8755075990 |
| H | 0.5147688044  | -32.5398690961 | 18.9427601774 |
| H | -0.5217252915 | -33.9518311854 | 18.8801678511 |
| H | -2.9909893127 | -33.1952947267 | 17.7779926089 |
| H | -3.2459533024 | -29.3549632664 | 19.4282823988 |
| H | 0.7638885104  | -33.8888031424 | 21.0295290656 |
| H | -3.9735527352 | -26.9870342697 | 19.6069750020 |
| H | -2.2907673420 | -27.0026616007 | 19.0611271571 |
| H | -4.7325411914 | -26.2542233222 | 17.3652745416 |
| H | -3.0376366448 | -26.1585817854 | 16.8080146578 |
| H | -2.3752732089 | -24.5169874951 | 18.6995189291 |
| H | -8.9139345631 | -23.7751033543 | 16.8821708249 |
| H | -9.9373460505 | -24.1725822296 | 15.5186108005 |
| H | -8.0198432847 | -25.6465938655 | 17.9760502293 |
| H | -8.5386588163 | -25.8669279151 | 13.7190352866 |
| H | -7.2014902178 | -27.9991668754 | 17.9896757875 |
| H | -7.7789482134 | -28.2130919356 | 13.7542317156 |

|    |                |                |               |
|----|----------------|----------------|---------------|
| H  | -8.1286256073  | -23.4051083745 | 13.9222102256 |
| H  | -10.1263385937 | -31.4737090554 | 21.2804436038 |
| H  | -10.5099201418 | -31.5491564169 | 19.5699602814 |
| H  | -8.3212861495  | -30.9956647300 | 17.7622945743 |
| H  | -5.3881640287  | -30.3945260501 | 20.6857836398 |
| H  | -10.7158552680 | -33.8254839426 | 20.6079551868 |
| H  | -1.0475372898  | -36.1400560416 | 18.4279796297 |
| H  | -1.0575274606  | -37.7271717847 | 17.6841265858 |
| H  | -2.6083983502  | -38.0626870705 | 15.9202678665 |
| H  | -1.0340329959  | -34.1130961790 | 16.5292131953 |
| H  | -4.0736894658  | -37.1815084660 | 14.1088325457 |
| H  | -2.5210263125  | -33.2356806794 | 14.7732264757 |
| H  | -4.2893680109  | -33.7204733842 | 13.3778304761 |
| H  | 0.9434989357   | -35.4804464204 | 17.0113382650 |
| H  | -4.0018282179  | -28.6031486621 | 14.8152380566 |
| H  | -4.8370224277  | -27.7741732470 | 13.3769796499 |
| H  | -6.5702037193  | -29.7625252967 | 15.1030001526 |
| H  | -5.5909239366  | -29.9926844537 | 12.5693922401 |
| H  | -4.7894851342  | -35.7167616099 | 16.4278376109 |
| H  | -7.5214505119  | -31.1579241166 | 21.8858686023 |
| H  | -1.0409578505  | -30.3767810850 | 20.2074703337 |
| H  | -8.6275926011  | -22.1255974694 | 15.0408905197 |
| H  | -7.1012413817  | -22.9955014783 | 15.3009952867 |
| H  | -4.0603653445  | -24.4909749666 | 19.2327484740 |
| H  | -2.7771833295  | -24.9131246794 | 20.3775409595 |
| H  | 0.9298989831   | -37.0802923691 | 16.2649252058 |
| H  | 1.2905626231   | -36.9124124500 | 17.9949512533 |
| H  | -5.8309136109  | -37.6728661681 | 18.1653215452 |
| H  | -6.8988458282  | -36.9930989077 | 19.4007110367 |
| H  | -9.4103457735  | -33.8160092829 | 19.4017969243 |
| H  | -9.0211653936  | -33.7619617517 | 21.1251564745 |
| S  | -1.0533827919  | -28.8484907918 | 13.3314496110 |
| C  | -1.3932167342  | -30.4205312615 | 14.2031099077 |
| C  | -0.2932227740  | -27.9100745139 | 14.7050947649 |
| H  | 0.6547917681   | -28.3661346240 | 15.0133977023 |
| H  | -0.0923506515  | -26.8997617645 | 14.3354757241 |
| H  | -0.9858484244  | -27.8714654200 | 15.5495888207 |
| H  | -2.0147414249  | -30.2427784653 | 15.0833253266 |
| H  | -1.9294709278  | -31.0660636059 | 13.5032977946 |
| H  | -0.4567094907  | -30.9105879509 | 14.4923744114 |
| H  | 0.0695847410   | -32.3161651728 | 21.4360285056 |
| H  | -0.9737900841  | -33.7436351239 | 21.3610750883 |
| Ni | -5.2174064491  | -30.7012079406 | 17.2983300848 |

**React<sub>Mn(II),VI</sub>**

|   |               |                |               |
|---|---------------|----------------|---------------|
| C | -5.8569950000 | -37.2389910000 | 19.1709910000 |
| C | -4.9879236655 | -35.9693352006 | 19.2333175546 |
| C | -5.3600229461 | -34.8920344278 | 18.2609604824 |
| N | -5.0995437319 | -34.9737081245 | 16.9028911066 |
| C | -5.8810908061 | -33.6321184606 | 18.4358321670 |
| C | -5.4395725588 | -33.7853235739 | 16.3356108138 |
| N | -5.9121464293 | -32.9402200973 | 17.2376915471 |
| C | -0.1150060000 | -33.2509900000 | 20.8939940000 |
| C | -0.4933019401 | -33.2290512735 | 19.3992624131 |
| C | -1.5808484208 | -32.2604775307 | 19.0453028569 |
| N | -1.5192731793 | -30.9075022990 | 19.3562183024 |
| C | -2.7660092102 | -32.4019292230 | 18.3634888361 |
| C | -2.6318180116 | -30.3021381122 | 18.8578146565 |
| N | -3.4087508756 | -31.1825599325 | 18.2534125583 |
| C | -3.1080190000 | -25.0239970000 | 19.3379980000 |
| C | -3.2463244516 | -26.3917884145 | 18.6701143312 |
| C | -3.5788710531 | -26.2815460248 | 17.1821470085 |
| C | -3.8042540460 | -27.6197090384 | 16.4758553008 |
| O | -3.6111580680 | -27.6627646018 | 15.2360509734 |
| O | -4.2076414045 | -28.5852153875 | 17.2020804424 |
| C | -8.1409660000 | -23.1040170000 | 14.9750030000 |
| C | -8.9383561708 | -24.0805623225 | 15.8737979740 |
| C | -8.4114591919 | -25.5063515864 | 15.9593250378 |
| C | -7.4758667268 | -25.8937687634 | 16.9342742341 |
| C | -8.8885894418 | -26.5244440527 | 15.1190200637 |
| C | -7.0257706969 | -27.2076715371 | 17.0602674688 |
| C | -8.4490754532 | -27.8460243195 | 15.2292029829 |
| C | -7.4784459190 | -28.2360863692 | 16.1912450493 |
| O | -7.0385573137 | -29.4814825368 | 16.2518870847 |
| C | -9.7309990000 | -33.4130130000 | 20.3670160000 |
| C | -9.6367528792 | -31.8726728422 | 20.4571466830 |
| C | -8.2918496305 | -31.3227005910 | 20.0882036537 |
| N | -7.1900848839 | -31.3535508682 | 20.9385704694 |
| C | -7.8129578108 | -30.7725896429 | 18.9257988857 |
| C | -6.1181968248 | -30.8424755339 | 20.2671776395 |
| N | -6.4652094052 | -30.4908156941 | 19.0455694724 |
| C | 0.6729850000  | -36.5289920000 | 17.1749980000 |
| C | -0.8341969125 | -36.7348623006 | 17.4085073662 |
| C | -1.6938818956 | -36.1794995576 | 16.2900104859 |
| C | -1.7102375459 | -34.8063775109 | 15.9980993427 |
| C | -2.4881191959 | -37.0160222402 | 15.4950386939 |
| C | -2.4905383484 | -34.2777626339 | 14.9738146871 |
| C | -3.2741680217 | -36.5093899339 | 14.4574315564 |
| C | -3.2860771833 | -35.1316895894 | 14.1866250274 |

|   |                |                |               |
|---|----------------|----------------|---------------|
| O | -4.1017235980  | -34.6854425567 | 13.2118179281 |
| C | -5.8250679937  | -29.0270907191 | 13.5292456264 |
| C | -6.1264148179  | -30.5194983304 | 13.5063722844 |
| C | -4.9156820443  | -31.3510913804 | 13.9478671057 |
| O | -4.5202008990  | -31.2212122887 | 15.1445668049 |
| O | -4.3697328065  | -32.0868441768 | 13.0788254008 |
| H | -5.0394041867  | -35.5388453099 | 20.2396625009 |
| H | -3.9352786216  | -36.2437557867 | 19.0713651806 |
| H | -6.2043061908  | -33.1782722985 | 19.3581933982 |
| H | -5.2960187086  | -33.5791124470 | 15.2895009357 |
| H | -5.5225496376  | -37.9769717114 | 19.9075717434 |
| H | 0.4061333341   | -33.0137253824 | 18.8037404261 |
| H | -0.8266080364  | -34.2240638267 | 19.0900922265 |
| H | -3.1817483226  | -33.2953202522 | 17.9272572573 |
| H | -2.8388187445  | -29.2449750422 | 18.9136026914 |
| H | 0.6716636907   | -33.9882793816 | 21.0820646020 |
| H | -4.0290406914  | -26.9807250800 | 19.1610127725 |
| H | -2.3094231479  | -26.9551130644 | 18.7907045238 |
| H | -4.5131496731  | -25.7169034438 | 17.0526587363 |
| H | -2.8015470333  | -25.7306057286 | 16.6408793428 |
| H | -2.3171657491  | -24.4281647847 | 18.8665252499 |
| H | -8.9805018225  | -23.6574034847 | 16.8864955231 |
| H | -9.9766935176  | -24.1070203840 | 15.5170730595 |
| H | -7.1006482317  | -25.1445381444 | 17.6321366912 |
| H | -9.6464267629  | -26.2838758080 | 14.3731545117 |
| H | -6.3019251695  | -27.4760423270 | 17.8220616406 |
| H | -8.8653040346  | -28.6178129474 | 14.5836842655 |
| H | -8.1165608255  | -23.4606729442 | 13.9387122169 |
| H | -9.9118250455  | -31.5444021270 | 21.4691729198 |
| H | -10.3727393341 | -31.4247415852 | 19.7813981243 |
| H | -8.3144010558  | -30.5681235267 | 17.9918573725 |
| H | -5.1225073040  | -30.7774651363 | 20.6798297974 |
| H | -10.7394457075 | -33.7551269782 | 20.6202766217 |
| H | -1.1153673960  | -36.2691591335 | 18.3646684303 |
| H | -1.0401253259  | -37.8057614520 | 17.5270888762 |
| H | -2.4943495603  | -38.0873388426 | 15.6875965374 |
| H | -1.1151896566  | -34.1224754896 | 16.5982959610 |
| H | -3.8903187512  | -37.1624615645 | 13.8465888679 |
| H | -2.5359659198  | -33.2058956912 | 14.8022863162 |
| H | -4.1019333118  | -33.6897286431 | 13.1641328919 |
| H | 0.9153373811   | -35.4645350612 | 17.0878810605 |
| H | -5.3265476626  | -28.7192028869 | 14.4501729772 |
| H | -6.7236842832  | -28.4238202304 | 13.3816035932 |
| H | -6.9145644927  | -30.6416380798 | 14.2573212990 |

|    |               |                |               |
|----|---------------|----------------|---------------|
| H  | -6.4786806465 | -30.8584343432 | 12.5282150121 |
| H  | -4.6249812240 | -35.7264089235 | 16.4168646181 |
| H  | -7.1937163512 | -31.6683266587 | 21.8971914923 |
| H  | -0.7647402158 | -30.4438706807 | 19.8388475183 |
| H  | -8.5914690570 | -22.1047793428 | 14.9826832576 |
| H  | -7.1044803339 | -23.0156087219 | 15.3200392103 |
| H  | -4.0406431284 | -24.4530048961 | 19.2564154157 |
| H  | -2.8660227986 | -25.1131720348 | 20.4034888923 |
| H  | 0.9897002723  | -37.0161380554 | 16.2471629917 |
| H  | 1.2631025369  | -36.9433220499 | 18.0002008258 |
| H  | -5.8044904698 | -37.7041287837 | 18.1805138759 |
| H  | -6.9067300349 | -37.0013540767 | 19.3710950004 |
| H  | -9.4895639312 | -33.7517370533 | 19.3550847763 |
| H  | -9.0265049889 | -33.8945223306 | 21.0548831078 |
| S  | -4.7118497559 | -28.4950171534 | 12.1546033399 |
| C  | -3.0745836444 | -29.1298607432 | 12.6522328252 |
| C  | -4.5556909968 | -26.7229607451 | 12.5569659511 |
| H  | -3.8781912201 | -26.2765862433 | 11.8255368410 |
| H  | -5.5523332682 | -26.2859882165 | 12.4617441077 |
| H  | -4.1758755909 | -26.6426481117 | 13.5817298343 |
| H  | -2.9466895177 | -28.9135784036 | 13.7169476520 |
| H  | -3.0740205958 | -30.2011627372 | 12.4440631000 |
| H  | -2.3374328656 | -28.6117602234 | 12.0345051352 |
| H  | 0.2599228731  | -32.2774824102 | 21.2312664612 |
| H  | -0.9817514120 | -33.5062553465 | 21.5120213049 |
| Mn | -5.3235842931 | -30.4088841596 | 17.0085809677 |

### TS<sub>Mn(II),VI</sub>

|   |                |                 |                |
|---|----------------|-----------------|----------------|
| C | -5.8569950000# | -37.2389910000# | 19.1709910000# |
| C | -5.1647900000# | -35.8917720000# | 19.4416550000# |
| C | -5.4812280000# | -34.8144950000# | 18.4514740000# |
| N | -5.2538830000# | -34.9491730000# | 17.0909220000# |
| C | -5.9174890000# | -33.5196540000# | 18.6019940000# |
| C | -5.5352100000# | -33.7614760000# | 16.4934170000# |
| N | -5.9331420000# | -32.8650510000  | 17.3811450000  |
| C | -0.1150060000  | -33.2509900000  | 20.8939940000  |
| C | -0.4951250000  | -33.2225680000  | 19.4022910000  |
| C | -1.5947880000  | -32.2647230000  | 19.0650970000  |
| N | -1.5437840000  | -30.9150910000  | 19.3904950000  |
| C | -2.7865860000  | -32.4140140000  | 18.3980770000  |
| C | -2.6672870000  | -30.3169850000  | 18.9130460000  |
| N | -3.4423470000  | -31.1997210000  | 18.3087270000  |
| C | -3.1080190000  | -25.0239970000  | 19.3379980000  |
| C | -3.2117800000  | -26.4268550000  | 18.7454790000  |

|   |               |                |               |
|---|---------------|----------------|---------------|
| C | -3.5146440000 | -26.4122390000 | 17.2439930000 |
| C | -3.6634330000 | -27.8132710000 | 16.6523800000 |
| O | -3.1089430000 | -28.0816780000 | 15.5659520000 |
| O | -4.3857850000 | -28.6140200000 | 17.3451540000 |
| C | -8.1409660000 | -23.1040170000 | 14.9750030000 |
| C | -8.9524130000 | -24.1728400000 | 15.7417930000 |
| C | -8.3807310000 | -25.5830360000 | 15.7401940000 |
| C | -7.6173090000 | -26.0704190000 | 16.8142580000 |
| C | -8.6492550000 | -26.4829890000 | 14.6987400000 |
| C | -7.1470560000 | -27.3834790000 | 16.8604770000 |
| C | -8.1956600000 | -27.8048760000 | 14.7305710000 |
| C | -7.4366770000 | -28.2891290000 | 15.8187350000 |
| O | -7.0141070000 | -29.5747040000 | 15.8465280000 |
| C | -9.7309990000 | -33.4130130000 | 20.3670160000 |
| C | -9.8731690000 | -31.9048670000 | 20.0674800000 |
| C | -8.5697750000 | -31.2328490000 | 19.7664470000 |
| N | -7.5850090000 | -31.0179110000 | 20.7259550000 |
| C | -8.0113920000 | -30.7921560000 | 18.5939210000 |
| C | -6.4974650000 | -30.4781630000 | 20.1070020000 |
| N | -6.7251240000 | -30.3376920000 | 18.8161060000 |
| C | 0.6729850000  | -36.5289920000 | 17.1749980000 |
| C | -0.8219350000 | -36.7170880000 | 17.4875590000 |
| C | -1.7467370000 | -36.1804130000 | 16.4126120000 |
| C | -1.7680810000 | -34.8180110000 | 16.0728600000 |
| C | -2.6134720000 | -37.0298920000 | 15.7115910000 |
| C | -2.6179120000 | -34.3114330000 | 15.0912370000 |
| C | -3.4684130000 | -36.5468430000 | 14.7187090000 |
| C | -3.4830620000 | -35.1780160000 | 14.3945860000 |
| O | -4.3642530000 | -34.7642970000 | 13.4686510000 |
| C | -5.2310100000 | -28.8871410000 | 13.4607220000 |
| C | -5.8978270000 | -30.1376750000 | 13.5341060000 |
| C | -5.0557650000 | -31.3120440000 | 13.9999410000 |
| O | -4.5833870000 | -31.2869700000 | 15.1844560000 |
| O | -4.8431190000 | -32.2310930000 | 13.1676880000 |
| H | -5.4416970000 | -35.5230180000 | 20.4353800000 |
| H | -4.0764750000 | -36.0494290000 | 19.4650290000 |
| H | -6.1886710000 | -33.0138470000 | 19.5154110000 |
| H | -5.4143760000 | -33.5876020000 | 15.4387930000 |
| H | -5.5868930000 | -37.9748660000 | 19.9346160000 |
| H | 0.3987410000  | -32.9903230000 | 18.8057600000 |
| H | -0.8177860000 | -34.2177180000 | 19.0854480000 |
| H | -3.1973880000 | -33.3074260000 | 17.9578710000 |
| H | -2.8844780000 | -29.2642730000 | 18.9928900000 |
| H | 0.6771410000  | -33.9831860000 | 21.0765930000 |

|   |                |                |               |
|---|----------------|----------------|---------------|
| H | -3.9985760000  | -26.9986430000 | 19.2496820000 |
| H | -2.2680750000  | -26.9654830000 | 18.9180950000 |
| H | -4.4696980000  | -25.8959670000 | 17.0726080000 |
| H | -2.7401040000  | -25.8715380000 | 16.6912890000 |
| H | -2.3130060000  | -24.4457990000 | 18.8530770000 |
| H | -9.0682310000  | -23.8418500000 | 16.7816480000 |
| H | -9.9662010000  | -24.2035540000 | 15.3214940000 |
| H | -7.3956440000  | -25.4070650000 | 17.6492290000 |
| H | -9.2558210000  | -26.1561840000 | 13.8556960000 |
| H | -6.5468410000  | -27.7325230000 | 17.6913970000 |
| H | -8.4543730000  | -28.4895780000 | 13.9273730000 |
| H | -8.0377760000  | -23.3757030000 | 13.9188780000 |
| H | -10.3723610000 | -31.4063370000 | 20.9095750000 |
| H | -10.5240040000 | -31.7639310000 | 19.1989800000 |
| H | -8.4164610000  | -30.7871460000 | 17.5933910000 |
| H | -5.5768720000  | -30.2316640000 | 20.6144760000 |
| H | -10.7108460000 | -33.8698840000 | 20.5353730000 |
| H | -1.0466870000  | -36.2356640000 | 18.4503090000 |
| H | -1.0270260000  | -37.7838680000 | 17.6371510000 |
| H | -2.6207060000  | -38.0931730000 | 15.9430070000 |
| H | -1.1190760000  | -34.1231840000 | 16.5997270000 |
| H | -4.1347680000  | -37.2110040000 | 14.1768460000 |
| H | -2.6612240000  | -33.2446090000 | 14.8919640000 |
| H | -4.4197250000  | -33.7653120000 | 13.3923500000 |
| H | 0.9198740000   | -35.4686910000 | 17.0566610000 |
| H | -4.5872220000  | -28.6011960000 | 14.2909130000 |
| H | -5.7284470000  | -28.0697460000 | 12.9450260000 |
| H | -6.5824890000  | -29.8622660000 | 14.6224700000 |
| H | -6.5438720000  | -30.3914130000 | 12.6931570000 |
| H | -4.8364260000  | -35.7411950000 | 16.6151620000 |
| H | -7.6739430000  | -31.2025980000 | 21.7136180000 |
| H | -0.7886220000  | -30.4493890000 | 19.8696840000 |
| H | -8.6321430000  | -22.1267040000 | 15.0312850000 |
| H | -7.1323980000  | -23.0073520000 | 15.3912780000 |
| H | -4.0451640000  | -24.4722610000 | 19.1992100000 |
| H | -2.8928840000  | -25.0501810000 | 20.4121910000 |
| H | 0.9389510000   | -37.0346400000 | 16.2415130000 |
| H | 1.2992030000   | -36.9338010000 | 17.9775060000 |
| H | -5.5606810000  | -37.6461730000 | 18.1982350000 |
| H | -6.9455440000  | -37.1264380000 | 19.1679300000 |
| H | -9.2425650000  | -33.9245610000 | 19.5323070000 |
| H | -9.1222960000  | -33.5838040000 | 21.2622680000 |
| S | -3.3485270000  | -28.9011950000 | 12.0440350000 |
| C | -2.2967610000  | -29.9913570000 | 13.0639310000 |

|    |               |                |               |
|----|---------------|----------------|---------------|
| C  | -2.7011750000 | -27.2691820000 | 12.5440740000 |
| H  | -1.6832200000 | -27.1495950000 | 12.1634270000 |
| H  | -3.3454940000 | -26.5113380000 | 12.0913050000 |
| H  | -2.7217810000 | -27.1929070000 | 13.6350040000 |
| H  | -2.4377920000 | -29.7429070000 | 14.1180730000 |
| H  | -2.6194790000 | -31.0144850000 | 12.8646240000 |
| H  | -1.2552110000 | -29.8591320000 | 12.7596300000 |
| H  | 0.2536120000  | -32.2773680000 | 21.2365390000 |
| H  | -0.9789120000 | -33.5157820000 | 21.5115150000 |
| Mn | -5.2929990000 | -30.4824050000 | 17.0185230000 |

**Prod<sub>Mn(II),VI</sub>**

|   |               |                |               |
|---|---------------|----------------|---------------|
| C | -5.8569950000 | -37.2389910000 | 19.1709910000 |
| C | -4.8228215581 | -36.0967869062 | 19.2296835908 |
| C | -5.1000867358 | -34.9365665543 | 18.3210209219 |
| N | -4.8643579371 | -34.9655198390 | 16.9548640529 |
| C | -5.5334881240 | -33.6564629051 | 18.5676671596 |
| C | -5.1352385780 | -33.7398624634 | 16.4410236186 |
| N | -5.5407729791 | -32.9151042958 | 17.3980460052 |
| C | -0.1150060000 | -33.2509900000 | 20.8939940000 |
| C | -0.1402279713 | -32.9529723910 | 19.3819111682 |
| C | -1.2686276424 | -32.0562360169 | 18.9811127608 |
| N | -1.2620575732 | -30.6842392083 | 19.2038212090 |
| C | -2.4935062508 | -32.3090259327 | 18.4172147980 |
| C | -2.4388750563 | -30.1691204564 | 18.7630719411 |
| N | -3.2096092193 | -31.1324601353 | 18.2874952779 |
| C | -3.1080190000 | -25.0239970000 | 19.3379980000 |
| C | -3.2788046215 | -26.3825278637 | 18.6579189975 |
| C | -4.1253673116 | -26.3179205890 | 17.3793583577 |
| C | -4.2337883220 | -27.6789312835 | 16.6874438443 |
| O | -3.9851170506 | -27.7818274409 | 15.4776656956 |
| O | -4.5742479806 | -28.6494658629 | 17.4751713490 |
| C | -8.1409660000 | -23.1040170000 | 14.9750030000 |
| C | -8.9935288287 | -24.0765919300 | 15.8133950517 |
| C | -8.4675740229 | -25.5013136294 | 15.8820173580 |
| C | -8.1989616594 | -26.1244728066 | 17.1087854127 |
| C | -8.2781365578 | -26.2609332097 | 14.7184108917 |
| C | -7.7744615401 | -27.4530932008 | 17.1839466947 |
| C | -7.8597097497 | -27.5889794647 | 14.7730638058 |
| C | -7.6136519286 | -28.1915410543 | 16.0112796376 |
| O | -7.2596654270 | -29.5149683120 | 16.1096646972 |
| C | -9.7309990000 | -33.4130130000 | 20.3670160000 |
| C | -9.6624312749 | -31.8771650688 | 20.4966889661 |
| C | -8.3341231449 | -31.3190382531 | 20.0886507561 |



|   |                |                |               |
|---|----------------|----------------|---------------|
| N | -7.2546718602  | -31.1951923848 | 20.9548778527 |
| C | -7.8465724214  | -30.9220430067 | 18.8697482275 |
| C | -6.1856471272  | -30.7375324222 | 20.2448638320 |
| N | -6.5163245312  | -30.5717453215 | 18.9795708535 |
| C | 0.6729850000   | -36.5289920000 | 17.1749980000 |
| C | -0.8406489447  | -36.5749887648 | 17.4502851193 |
| C | -1.6660123164  | -36.1331441914 | 16.2593462220 |
| C | -1.6032787847  | -34.8107186383 | 15.7912008893 |
| C | -2.4900904697  | -37.0267742958 | 15.5634921403 |
| C | -2.3393480271  | -34.3868947192 | 14.6899590522 |
| C | -3.2483425768  | -36.6172647776 | 14.4618052313 |
| C | -3.1878797612  | -35.2872627364 | 14.0191142401 |
| O | -3.9565472875  | -34.9224171339 | 12.9713327784 |
| C | -5.1021183396  | -29.0380932515 | 12.8357735501 |
| C | -5.0129547017  | -30.3693844177 | 12.7277824585 |
| C | -4.9570219815  | -31.2807605756 | 13.9098057415 |
| O | -5.2983028151  | -30.7970812713 | 15.0555168145 |
| O | -4.5998681696  | -32.4679952653 | 13.7362612673 |
| H | -4.7654797763  | -35.7109473360 | 20.2541313990 |
| H | -3.8262051960  | -36.4976055473 | 18.9966879557 |
| H | -5.8124027273  | -33.2188074928 | 19.5139143800 |
| H | -4.9952121594  | -33.4598901635 | 15.4031658533 |
| H | -5.5846084596  | -38.0439415142 | 19.8611408233 |
| H | 0.8162960337   | -32.5102564390 | 19.0732611569 |
| H | -0.2359391575  | -33.8890250433 | 18.8226141365 |
| H | -2.8931779996  | -33.2524359273 | 18.0812562095 |
| H | -2.7062850022  | -29.1242445016 | 18.7653894703 |
| H | 0.7223307847   | -33.9085634131 | 21.1484593724 |
| H | -3.7495604297  | -27.0929280822 | 19.3479183697 |
| H | -2.2858103739  | -26.7876109419 | 18.4099157008 |
| H | -5.1439873685  | -25.9899117697 | 17.6268509534 |
| H | -3.7063407218  | -25.5993248640 | 16.6682376987 |
| H | -2.6169671172  | -24.3059130207 | 18.6708605652 |
| H | -9.0892165445  | -23.6828153991 | 16.8328959946 |
| H | -10.0128178888 | -24.0933735924 | 15.4011944353 |
| H | -8.3271210115  | -25.5603054019 | 18.0306951793 |
| H | -8.4784178234  | -25.8150134385 | 13.7467755226 |
| H | -7.5473084264  | -27.9268330121 | 18.1333144148 |
| H | -7.7301873125  | -28.1674782682 | 13.8622125502 |
| H | -8.0569268382  | -23.4402052909 | 13.9363150544 |
| H | -9.8953697543  | -31.5764168012 | 21.5268760307 |
| H | -10.4323376392 | -31.4225829490 | 19.8641680130 |
| H | -8.3454839044  | -30.8650122174 | 17.9146392818 |
| H | -5.2074416434  | -30.5588078307 | 20.6657742463 |

|    |                |                |               |
|----|----------------|----------------|---------------|
| H  | -10.7178248380 | -33.7851902252 | 20.6601757571 |
| H  | -1.0702175474  | -35.9400125412 | 18.3189250216 |
| H  | -1.1280167617  | -37.5939396507 | 17.7380146654 |
| H  | -2.5490297918  | -38.0635572321 | 15.8898134256 |
| H  | -0.9692769674  | -34.0886170642 | 16.3018875533 |
| H  | -3.8958497813  | -37.3108421809 | 13.9338005428 |
| H  | -2.2921924609  | -33.3594737479 | 14.3456935815 |
| H  | -4.1021845766  | -33.9487402163 | 12.9969558358 |
| H  | 0.9940751159   | -35.5149377181 | 16.9142903899 |
| H  | -5.1023336923  | -28.5513915741 | 13.8070108904 |
| H  | -5.1081285994  | -28.4079072697 | 11.9491747707 |
| H  | -6.7375303797  | -29.8151971813 | 15.3295834893 |
| H  | -4.9248560614  | -30.8676724877 | 11.7655509135 |
| H  | -4.4577596957  | -35.7287409965 | 16.4237650546 |
| H  | -7.2739698248  | -31.3739360083 | 21.9479809082 |
| H  | -0.4920525509  | -30.1499283190 | 19.5783724463 |
| H  | -8.5861606969  | -22.1033260126 | 14.9691033171 |
| H  | -7.1261266817  | -23.0273296305 | 15.3795658690 |
| H  | -4.0802088787  | -24.6001407606 | 19.6170839341 |
| H  | -2.5032178772  | -25.0989135215 | 20.2495677375 |
| H  | 0.9313408210   | -37.1814784461 | 16.3349680659 |
| H  | 1.2473247498   | -36.8520168326 | 18.0507101066 |
| H  | -5.9186796622  | -37.6631928669 | 18.1631666365 |
| H  | -6.8532911078  | -36.8740527142 | 19.4402652035 |
| H  | -9.5370868232  | -33.7180237994 | 19.3344229641 |
| H  | -8.9813112533  | -33.8964225553 | 21.0031419156 |
| S  | -1.3559108492  | -30.5295729172 | 13.7117226183 |
| C  | -1.9733323327  | -30.4947345138 | 15.4268932424 |
| C  | -1.4384437313  | -28.7387243340 | 13.3564825894 |
| H  | -0.7151312000  | -28.1825954791 | 13.9619791138 |
| H  | -1.1966372559  | -28.6043729653 | 12.2984611428 |
| H  | -2.4440177292  | -28.3629787856 | 13.5596267367 |
| H  | -2.8505211602  | -29.8470451023 | 15.4873468759 |
| H  | -2.2569958578  | -31.5105433913 | 15.7049847711 |
| H  | -1.2081287049  | -30.1365341099 | 16.1239609101 |
| H  | -0.0113953983  | -32.3303307646 | 21.4789393027 |
| H  | -1.0440293493  | -33.7400749002 | 21.2037528675 |
| Mn | -5.1469712399  | -30.6068196745 | 17.1709596571 |

### React<sub>Fe(II),V</sub>

|   |               |                |               |
|---|---------------|----------------|---------------|
| C | -5.8569950000 | -37.2389910000 | 19.1709910000 |
| C | -5.1587119644 | -35.8824193760 | 19.3823273018 |
| C | -5.4842756849 | -34.8249361470 | 18.3711446737 |
| N | -5.2013397419 | -34.9475775469 | 17.0200884169 |

|   |               |                |               |
|---|---------------|----------------|---------------|
| C | -5.9583825767 | -33.5426424374 | 18.5077484613 |
| C | -5.4859862268 | -33.7613744953 | 16.4184483252 |
| N | -5.9403528633 | -32.8778795701 | 17.2927159248 |
| C | -0.1150060000 | -33.2509900000 | 20.8939940000 |
| C | -0.6036076846 | -33.2540327254 | 19.4293958239 |
| C | -1.7222000641 | -32.3021863788 | 19.1139971106 |
| N | -1.7365204872 | -30.9754220036 | 19.5272096103 |
| C | -2.8537502346 | -32.4316214528 | 18.3425440353 |
| C | -2.8367765135 | -30.3720747877 | 18.9990338311 |
| N | -3.5343651988 | -31.2299845778 | 18.2765803058 |
| C | -3.1080190000 | -25.0239970000 | 19.3379980000 |
| C | -3.2935146850 | -26.4206574547 | 18.7476165132 |
| C | -3.5758336382 | -26.3785061555 | 17.2460231603 |
| C | -3.8023918046 | -27.7499965961 | 16.6070867052 |
| O | -3.4917707455 | -27.8827186376 | 15.3960216746 |
| O | -4.3258307740 | -28.6349600825 | 17.3543389818 |
| C | -8.1409660000 | -23.1040170000 | 14.9750030000 |
| C | -8.9420804550 | -24.1926807677 | 15.7379328538 |
| C | -8.3472481692 | -25.5967891092 | 15.8212891942 |
| C | -7.5073444598 | -25.9878761900 | 16.8797213342 |
| C | -8.7053004331 | -26.6083534465 | 14.9153660381 |
| C | -7.0440049130 | -27.2962494598 | 17.0302969674 |
| C | -8.2511078961 | -27.9239988509 | 15.0490187558 |
| C | -7.3881747494 | -28.3153022862 | 16.1052767052 |
| O | -6.9595146819 | -29.5698886043 | 16.2021650114 |
| C | -9.7309990000 | -33.4130130000 | 20.3670160000 |
| C | -9.7156710053 | -31.8668567835 | 20.3934798228 |
| C | -8.3842249661 | -31.2664174462 | 20.0547132607 |
| N | -7.3153869587 | -31.2138606942 | 20.9444443735 |
| C | -7.8831543047 | -30.7482509717 | 18.8869928127 |
| C | -6.2399239753 | -30.6871567726 | 20.2875531742 |
| N | -6.5524637810 | -30.4067050944 | 19.0390098562 |
| C | 0.6729850000  | -36.5289920000 | 17.1749980000 |
| C | -0.8145056460 | -36.7813130467 | 17.4744489557 |
| C | -1.7304292368 | -36.2564484739 | 16.3874651760 |
| C | -1.7405838393 | -34.8945964149 | 16.0470751390 |
| C | -2.5761766806 | -37.1075870541 | 15.6653535128 |
| C | -2.5560430135 | -34.3915210080 | 15.0389119589 |
| C | -3.4008909697 | -36.6266299438 | 14.6448087034 |
| C | -3.3972589484 | -35.2611839252 | 14.3186886118 |
| O | -4.2402952961 | -34.8322682008 | 13.3588138689 |
| C | -5.5567773368 | -29.0758342767 | 13.4923353530 |
| C | -5.9479311616 | -30.5457489482 | 13.4794298578 |
| C | -4.8126268893 | -31.4280581350 | 14.0131676018 |

|   |                |                |               |
|---|----------------|----------------|---------------|
| O | -4.4546169209  | -31.2655487018 | 15.2140331847 |
| O | -4.2763256087  | -32.2291476556 | 13.1916409581 |
| H | -5.4172863431  | -35.4837566133 | 20.3700557995 |
| H | -4.0697828295  | -36.0404762762 | 19.3924655785 |
| H | -6.2772087098  | -33.0543539777 | 19.4133716397 |
| H | -5.3198412517  | -33.5863716213 | 15.3705791741 |
| H | -5.5668439102  | -37.9501497472 | 19.9512157796 |
| H | 0.2531042972   | -33.0458465980 | 18.7711952266 |
| H | -0.9481057383  | -34.2574998660 | 19.1614647642 |
| H | -3.2014311080  | -33.3009928297 | 17.8093253704 |
| H | -3.0901441634  | -29.3302036426 | 19.1169770665 |
| H | 0.6768446591   | -33.9930338743 | 21.0323428678 |
| H | -4.1188177785  | -26.9431009173 | 19.2440140560 |
| H | -2.3896198248  | -27.0206502889 | 18.9296435189 |
| H | -4.4955798604  | -25.8049363689 | 17.0607129137 |
| H | -2.7689604046  | -25.8701365048 | 16.7062310753 |
| H | -2.2725125052  | -24.4976391048 | 18.8605947931 |
| H | -9.1145727572  | -23.8300121744 | 16.7602230480 |
| H | -9.9366237597  | -24.2655549066 | 15.2780003338 |
| H | -7.2248681623  | -25.2483775524 | 17.6295049059 |
| H | -9.3875073750  | -26.3715464233 | 14.0988300903 |
| H | -6.3975598442  | -27.5659042642 | 17.8573886815 |
| H | -8.5824169672  | -28.6889309612 | 14.3488920822 |
| H | -7.9898149580  | -23.3904666070 | 13.9279091860 |
| H | -10.0500375806 | -31.5111954144 | 21.3779135633 |
| H | -10.4428604811 | -31.4855247569 | 19.6691197342 |
| H | -8.3580449581  | -30.6138658666 | 17.9272092129 |
| H | -5.2654936448  | -30.5609758314 | 20.7352770358 |
| H | -10.7335467585 | -33.7947686610 | 20.5844885363 |
| H | -1.0685681015  | -36.3191565450 | 18.4399167902 |
| H | -0.9828661415  | -37.8572514351 | 17.6050747907 |
| H | -2.5889983751  | -38.1708965302 | 15.8979380369 |
| H | -1.1068413036  | -34.1997494105 | 16.5931556103 |
| H | -4.0520993978  | -37.2919641198 | 14.0855471804 |
| H | -2.5903454405  | -33.3276075073 | 14.8240762483 |
| H | -4.1930880365  | -33.8394891305 | 13.2693146514 |
| H | 0.8817029837   | -35.4581963709 | 17.0808927216 |
| H | -5.1356528277  | -28.7756835006 | 14.4545847183 |
| H | -6.3897407092  | -28.4210531914 | 13.2261509794 |
| H | -6.7839508742  | -30.6081331757 | 14.1845379673 |
| H | -6.2569730856  | -30.8886160822 | 12.4882616574 |
| H | -4.7554589198  | -35.7307653232 | 16.5554476448 |
| H | -7.3431760487  | -31.4823495878 | 21.9165534647 |
| H | -1.0378618805  | -30.5246586459 | 20.0978907730 |

|    |               |                |               |
|----|---------------|----------------|---------------|
| H  | -8.6737282438 | -22.1467829922 | 14.9956438271 |
| H  | -7.1527323534 | -22.9571126167 | 15.4252619203 |
| H  | -4.0069470378 | -24.4137938329 | 19.1885346623 |
| H  | -2.9062959739 | -25.0582887311 | 20.4152268655 |
| H  | 0.9627766803  | -37.0049438853 | 16.2325885538 |
| H  | 1.3118835072  | -36.9267605796 | 17.9716756296 |
| H  | -5.5858725023 | -37.6764180761 | 18.2034775485 |
| H  | -6.9456591211 | -37.1261386071 | 19.1924937563 |
| H  | -9.4200323366 | -33.7809817418 | 19.3847852964 |
| H  | -9.0409881526 | -33.8287227729 | 21.1101337681 |
| S  | -4.2631719986 | -28.6636985490 | 12.2341680160 |
| C  | -2.7347385640 | -29.3988583401 | 12.9117384175 |
| C  | -4.0125441964 | -26.8995775789 | 12.6219308197 |
| H  | -3.2187578594 | -26.5275909149 | 11.9703208483 |
| H  | -4.9508005640 | -26.3867810983 | 12.3993651790 |
| H  | -3.7530186905 | -26.8257264576 | 13.6844648793 |
| H  | -2.7181962844 | -29.1937496377 | 13.9858909751 |
| H  | -2.7729943402 | -30.4673796964 | 12.6948480083 |
| H  | -1.9034605092 | -28.9225324154 | 12.3867599634 |
| H  | 0.2969690458  | -32.2768192010 | 21.1830672112 |
| H  | -0.9331614534 | -33.4869860139 | 21.5820291201 |
| Fe | -5.3895210061 | -30.4761212946 | 17.0387869343 |

### TS<sub>Fe(II),V</sub>

|   |                |                 |                |
|---|----------------|-----------------|----------------|
| C | -5.8569950000# | -37.2389910000# | 19.1709910000# |
| C | -5.1787990000# | -35.8859580000# | 19.4510650000# |
| C | -5.4967650000# | -34.8032170000# | 18.4662570000# |
| N | -5.3068200000# | -34.9450100000# | 17.1008200000# |
| C | -5.8873670000# | -33.4952920000# | 18.6258760000# |
| C | -5.5617160000# | -33.7496250000# | 16.5086790000# |
| N | -5.9086370000  | -32.8398910000  | 17.4047830000  |
| C | -0.1150060000  | -33.2509900000  | 20.8939940000  |
| C | -0.5141010000  | -33.2062030000  | 19.4070010000  |
| C | -1.6290650000  | -32.2568250000  | 19.0915920000  |
| N | -1.6255110000  | -30.9300390000  | 19.5007720000  |
| C | -2.7903300000  | -32.3917040000  | 18.3677470000  |
| C | -2.7467270000  | -30.3305780000  | 19.0159280000  |
| N | -3.4726100000  | -31.1904110000  | 18.3259740000  |
| C | -3.1080190000  | -25.0239970000  | 19.3379980000  |
| C | -3.2444310000  | -26.4522250000  | 18.8160540000  |
| C | -3.5590120000  | -26.4986750000  | 17.3166430000  |
| C | -3.6804460000  | -27.9253950000  | 16.7902950000  |
| O | -3.0103760000  | -28.2794370000  | 15.8004830000  |
| O | -4.5049690000  | -28.6629950000  | 17.4456840000  |

|   |               |                |               |
|---|---------------|----------------|---------------|
| C | -8.1409660000 | -23.1040170000 | 14.9750030000 |
| C | -8.9225250000 | -24.1742550000 | 15.7712800000 |
| C | -8.3424120000 | -25.5818340000 | 15.7732580000 |
| C | -7.6640590000 | -26.0991120000 | 16.8896430000 |
| C | -8.5299060000 | -26.4563480000 | 14.6926540000 |
| C | -7.1998370000 | -27.4143610000 | 16.9401660000 |
| C | -8.0798240000 | -27.7794790000 | 14.7263580000 |
| C | -7.4071880000 | -28.2959910000 | 15.8581430000 |
| O | -6.9924730000 | -29.5810100000 | 15.8869180000 |
| C | -9.7309990000 | -33.4130130000 | 20.3670160000 |
| C | -9.8561140000 | -31.8973090000 | 20.0960270000 |
| C | -8.5475150000 | -31.2365360000 | 19.7912330000 |
| N | -7.5616080000 | -31.0218310000 | 20.7499300000 |
| C | -7.9829770000 | -30.8135960000 | 18.6148690000 |
| C | -6.4665690000 | -30.5023050000 | 20.1265880000 |
| N | -6.6913640000 | -30.3752750000 | 18.8341230000 |
| C | 0.6729850000  | -36.5289920000 | 17.1749980000 |
| C | -0.8145070000 | -36.7376540000 | 17.5072370000 |
| C | -1.7564780000 | -36.2122650000 | 16.4422670000 |
| C | -1.7797150000 | -34.8528500000 | 16.0912490000 |
| C | -2.6340470000 | -37.0661180000 | 15.7612160000 |
| C | -2.6418810000 | -34.3530030000 | 15.1179070000 |
| C | -3.5009880000 | -36.5902670000 | 14.7747830000 |
| C | -3.5165520000 | -35.2245070000 | 14.4395870000 |
| O | -4.4071410000 | -34.8119720000 | 13.5213880000 |
| C | -5.0699030000 | -28.9081450000 | 13.5672320000 |
| C | -5.7898320000 | -30.1333300000 | 13.6211170000 |
| C | -5.0025770000 | -31.3347450000 | 14.1094640000 |
| O | -4.5503570000 | -31.3313010000 | 15.3017490000 |
| O | -4.8054240000 | -32.2599420000 | 13.2778260000 |
| H | -5.4622590000 | -35.5252120000 | 20.4459160000 |
| H | -4.0893190000 | -36.0350440000 | 19.4781500000 |
| H | -6.1181380000 | -32.9813300000 | 19.5451750000 |
| H | -5.4591340000 | -33.5831480000 | 15.4514630000 |
| H | -5.5854440000 | -37.9736470000 | 19.9351370000 |
| H | 0.3712200000  | -32.9552720000 | 18.8051000000 |
| H | -0.8273500000 | -34.2012390000 | 19.0798710000 |
| H | -3.1646120000 | -33.2654900000 | 17.8605200000 |
| H | -2.9941940000 | -29.2918070000 | 19.1604430000 |
| H | 0.6828110000  | -33.9816840000 | 21.0563690000 |
| H | -4.0387720000 | -26.9832850000 | 19.3527030000 |
| H | -2.3093710000 | -26.9995480000 | 19.0060220000 |
| H | -4.5225410000 | -26.0041400000 | 17.1337510000 |
| H | -2.7901270000 | -25.9725480000 | 16.7425800000 |

|   |                |                |               |
|---|----------------|----------------|---------------|
| H | -2.3038560000  | -24.4889430000 | 18.8200350000 |
| H | -9.0190170000  | -23.8337470000 | 16.8098860000 |
| H | -9.9456410000  | -24.2170100000 | 15.3742290000 |
| H | -7.5068990000  | -25.4577420000 | 17.7559180000 |
| H | -9.0702150000  | -26.1086020000 | 13.8135020000 |
| H | -6.6663410000  | -27.7853830000 | 17.8057470000 |
| H | -8.2788280000  | -28.4422870000 | 13.8885460000 |
| H | -8.0538020000  | -23.3876800000 | 13.9205210000 |
| H | -10.3386850000 | -31.4074460000 | 20.9527370000 |
| H | -10.5157540000 | -31.7327760000 | 19.2383330000 |
| H | -8.3849330000  | -30.8118990000 | 17.6131700000 |
| H | -5.5418170000  | -30.2633690000 | 20.6297830000 |
| H | -10.7147830000 | -33.8590160000 | 20.5417920000 |
| H | -1.0338760000  | -36.2582740000 | 18.4723900000 |
| H | -1.0038630000  | -37.8069720000 | 17.6593070000 |
| H | -2.6398680000  | -38.1272570000 | 16.0022460000 |
| H | -1.1214150000  | -34.1551680000 | 16.6026460000 |
| H | -4.1743150000  | -37.2582720000 | 14.2462860000 |
| H | -2.6887140000  | -33.2876500000 | 14.9129080000 |
| H | -4.4503150000  | -33.8121440000 | 13.4517110000 |
| H | 0.9047410000   | -35.4655100000 | 17.0553250000 |
| H | -4.4595900000  | -28.6447660000 | 14.4273140000 |
| H | -5.5189750000  | -28.0734130000 | 13.0345020000 |
| H | -6.5058560000  | -29.8553220000 | 14.6717150000 |
| H | -6.4066400000  | -30.3657130000 | 12.7523890000 |
| H | -4.9190280000  | -35.7471470000 | 16.6174460000 |
| H | -7.6550300000  | -31.1928090000 | 21.7396160000 |
| H | -0.9025120000  | -30.4775360000 | 20.0382160000 |
| H | -8.6459400000  | -22.1335810000 | 15.0276070000 |
| H | -7.1262100000  | -22.9868050000 | 15.3704190000 |
| H | -4.0341880000  | -24.4601280000 | 19.1770880000 |
| H | -2.8862330000  | -25.0017810000 | 20.4108350000 |
| H | 0.9330620000   | -37.0296630000 | 16.2371610000 |
| H | 1.3156510000   | -36.9265860000 | 17.9681140000 |
| H | -5.5483430000  | -37.6418120000 | 18.2001810000 |
| H | -6.9465720000  | -37.1373350000 | 19.1596280000 |
| H | -9.2621980000  | -33.9159270000 | 19.5160540000 |
| H | -9.1110310000  | -33.6076990000 | 21.2494650000 |
| S | -3.1553830000  | -29.0018740000 | 12.2469540000 |
| C | -2.1849740000  | -30.1567080000 | 13.2771620000 |
| C | -2.4485410000  | -27.4122700000 | 12.7988530000 |
| H | -1.4165700000  | -27.3325860000 | 12.4469690000 |
| H | -3.0452060000  | -26.6153980000 | 12.3479210000 |
| H | -2.4944740000  | -27.3599580000 | 13.8903960000 |

|    |               |                |               |
|----|---------------|----------------|---------------|
| H  | -2.3673860000 | -29.9397620000 | 14.3318730000 |
| H  | -2.5266380000 | -31.1625030000 | 13.0286290000 |
| H  | -1.1278380000 | -30.0438820000 | 13.0232270000 |
| H  | 0.2557220000  | -32.2808170000 | 21.2441800000 |
| H  | -0.9690150000 | -33.5276490000 | 21.5200660000 |
| Fe | -5.3023850000 | -30.4948110000 | 17.0852880000 |

**Prod<sub>Fe(II),V</sub>**

|   |               |                |               |
|---|---------------|----------------|---------------|
| C | -5.8569950000 | -37.2389910000 | 19.1709910000 |
| C | -4.7126384854 | -36.2313678579 | 18.9413290542 |
| C | -5.0238167884 | -35.1118574016 | 17.9924773157 |
| N | -4.8911376944 | -35.2179893813 | 16.6154202915 |
| C | -5.3888032456 | -33.8043483155 | 18.2017736512 |
| C | -5.1376333719 | -34.0026745380 | 16.0620431409 |
| N | -5.4421446855 | -33.1195874026 | 17.0001299171 |
| C | -0.1150060000 | -33.2509900000 | 20.8939940000 |
| C | -0.2090736711 | -33.1110669407 | 19.3605316117 |
| C | -1.3435912573 | -32.2409869262 | 18.9186642110 |
| N | -1.4385136230 | -30.9027975201 | 19.2762586386 |
| C | -2.4744655105 | -32.4819050272 | 18.1779402755 |
| C | -2.5819927209 | -30.3949582297 | 18.7485347078 |
| N | -3.2343735354 | -31.3279513039 | 18.0802105017 |
| C | -3.1080190000 | -25.0239970000 | 19.3379980000 |
| C | -3.1981274653 | -26.4342768780 | 18.7505575850 |
| C | -4.3101427456 | -26.5737881413 | 17.6954713059 |
| C | -4.2518414060 | -27.9573881015 | 17.0515159837 |
| O | -3.5650540782 | -28.1206218846 | 16.0276843577 |
| O | -4.8794289196 | -28.8930368356 | 17.6829588267 |
| C | -8.1409660000 | -23.1040170000 | 14.9750030000 |
| C | -9.0298389976 | -24.2913842367 | 15.3948142618 |
| C | -8.3398104730 | -25.6456314998 | 15.3823944079 |
| C | -8.2231042606 | -26.4216036947 | 16.5437480747 |
| C | -7.8302926315 | -26.1872543992 | 14.1938336433 |
| C | -7.6422604438 | -27.6911055455 | 16.5303604055 |
| C | -7.2488381012 | -27.4538476107 | 14.1583437535 |
| C | -7.1620949288 | -28.2136975617 | 15.3300401769 |
| O | -6.6420895045 | -29.4874267195 | 15.3277445725 |
| C | -9.7309990000 | -33.4130130000 | 20.3670160000 |
| C | -9.9932920492 | -32.1171348735 | 19.5752516856 |
| C | -8.7240988212 | -31.4372827045 | 19.1662332722 |
| N | -8.1062583055 | -30.4433591248 | 19.9144153210 |
| C | -7.8639924415 | -31.6730405440 | 18.1246343827 |
| C | -6.9320864395 | -30.1161918471 | 19.3107074114 |
| N | -6.7599700122 | -30.8545914903 | 18.2303577049 |



|   |                |                |               |
|---|----------------|----------------|---------------|
| C | 0.6729850000   | -36.5289920000 | 17.1749980000 |
| C | -0.8417168510  | -36.7197202477 | 17.3514644563 |
| C | -1.6231719690  | -36.2996533344 | 16.1249741512 |
| C | -1.6081038410  | -34.9646727897 | 15.6924381455 |
| C | -2.3586138813  | -37.2182984634 | 15.3664117379 |
| C | -2.3162446607  | -34.5491422678 | 14.5710090302 |
| C | -3.0788498658  | -36.8208727092 | 14.2360157880 |
| C | -3.0753954310  | -35.4769123021 | 13.8341358353 |
| O | -3.8201005464  | -35.1278223155 | 12.7640396438 |
| C | -4.1117286322  | -29.0589230091 | 13.1063436553 |
| C | -4.3931575377  | -30.3212281851 | 12.7540945644 |
| C | -4.4517845077  | -31.4595848750 | 13.7301709759 |
| O | -4.4097340794  | -31.1783606192 | 14.9805664352 |
| O | -4.5444633709  | -32.6174841005 | 13.2597548186 |
| H | -4.4285322877  | -35.7845608645 | 19.9012211257 |
| H | -3.8231209275  | -36.7631937423 | 18.5765854096 |
| H | -5.5734680450  | -33.2973879129 | 19.1370823024 |
| H | -5.0484836896  | -33.7776689448 | 15.0088778967 |
| H | -5.5528707135  | -38.0158298088 | 19.8800547292 |
| H | 0.7380818559   | -32.7175840492 | 18.9665944542 |
| H | -0.3427162262  | -34.0969473510 | 18.9041853648 |
| H | -2.7855471989  | -33.3981080192 | 17.7046812904 |
| H | -2.9097411850  | -29.3750922719 | 18.8562077230 |
| H | 0.7178227545   | -33.9039632951 | 21.1733601550 |
| H | -3.3774178232  | -27.1592523350 | 19.5575964114 |
| H | -2.2372869657  | -26.7006944649 | 18.2897753599 |
| H | -5.2911668181  | -26.4197605412 | 18.1575916774 |
| H | -4.1717941492  | -25.8217424615 | 16.9124064385 |
| H | -2.8964806582  | -24.2882833498 | 18.5536906752 |
| H | -9.4292326337  | -24.1034227308 | 16.3990674877 |
| H | -9.9015071830  | -24.3302835527 | 14.7264744102 |
| H | -8.5993568773  | -26.0265393250 | 17.4855148428 |
| H | -7.9038535675  | -25.6183002781 | 13.2696293578 |
| H | -7.5304116708  | -28.2782881456 | 17.4333091120 |
| H | -6.8736794496  | -27.8631509577 | 13.2239097069 |
| H | -7.7517995226  | -23.2387189358 | 13.9604303756 |
| H | -10.6135818064 | -31.4315472443 | 20.1670004500 |
| H | -10.5703524885 | -32.3494525873 | 18.6735511930 |
| H | -7.9456141855  | -32.3852807058 | 17.3191677677 |
| H | -6.2598307595  | -29.3330319744 | 19.6247447837 |
| H | -10.6706710424 | -33.9049370417 | 20.6389963887 |
| H | -1.1817500341  | -36.1431411408 | 18.2246682380 |
| H | -1.0546616474  | -37.7708179429 | 17.5823242418 |
| H | -2.3760778799  | -38.2650242193 | 15.6642963824 |

|    |               |                |               |
|----|---------------|----------------|---------------|
| H  | -1.0398618512 | -34.2241544436 | 16.2504765097 |
| H  | -3.6561121807 | -37.5338455485 | 13.6549821829 |
| H  | -2.3248485275 | -33.5041898284 | 14.2800482967 |
| H  | -3.9884419226 | -34.1585288606 | 12.7836714614 |
| H  | 0.9185786274  | -35.4808884550 | 16.9744307148 |
| H  | -3.9106856340 | -28.7842895445 | 14.1405232606 |
| H  | -4.0597643358 | -28.2742625525 | 12.3548450786 |
| H  | -6.0862142792 | -29.6115565550 | 14.5428799765 |
| H  | -4.5665041441 | -30.6073404986 | 11.7190814318 |
| H  | -4.5155314597 | -36.0097543596 | 16.1051499801 |
| H  | -8.4819219294 | -30.0143894570 | 20.7468530543 |
| H  | -0.7566536172 | -30.3828263029 | 19.8077788471 |
| H  | -8.7072912272 | -22.1668986572 | 14.9970348407 |
| H  | -7.2822368660 | -23.0027469623 | 15.6470426139 |
| H  | -4.0510282262 | -24.7341064291 | 19.8167101213 |
| H  | -2.3139492167 | -24.9490417042 | 20.0897524188 |
| H  | 1.0398613585  | -37.1197188025 | 16.3295715182 |
| H  | 1.2213386939  | -36.8372943788 | 18.0724769273 |
| H  | -6.1464333800 | -37.7274023362 | 18.2344540134 |
| H  | -6.7419215111 | -36.7338051700 | 19.5713517433 |
| H  | -9.1364439770 | -34.1106616276 | 19.7691278515 |
| H  | -9.1756834653 | -33.2055983233 | 21.2881410619 |
| S  | 0.2507803564  | -29.6598389102 | 15.4129222413 |
| C  | -1.2694429448 | -30.6693921077 | 15.2624248843 |
| C  | -0.3101836526 | -28.4296544377 | 16.6442806942 |
| H  | -0.4430237907 | -28.8868489562 | 17.6300074643 |
| H  | 0.4660563810  | -27.6617243470 | 16.7106785370 |
| H  | -1.2541837487 | -27.9802675045 | 16.3268327854 |
| H  | -2.1545519286 | -30.0317927777 | 15.2568558513 |
| H  | -1.2102625743 | -31.2071737987 | 14.3126280264 |
| H  | -1.3547251638 | -31.3918467058 | 16.0761857223 |
| H  | 0.0487024502  | -32.2806422947 | 21.3765736407 |
| H  | -1.0382032415 | -33.6746816757 | 21.3018432615 |
| Fe | -5.0325760938 | -30.8095444766 | 16.8570519586 |

### React<sub>Co(II),IV</sub>

|   |               |                |               |
|---|---------------|----------------|---------------|
| C | -5.8569950000 | -37.2389910000 | 19.1709910000 |
| C | -5.2109057219 | -35.8665037996 | 19.4368617118 |
| C | -5.5388594179 | -34.8007895290 | 18.4357277724 |
| N | -5.2522324488 | -34.9126071325 | 17.0851372228 |
| C | -6.0230475864 | -33.5228499406 | 18.5793638629 |
| C | -5.5466327550 | -33.7243990273 | 16.4905852092 |
| N | -6.0100730246 | -32.8504750426 | 17.3688370683 |
| C | -0.1150060000 | -33.2509900000 | 20.8939940000 |

|   |               |                |               |
|---|---------------|----------------|---------------|
| C | -0.6636438874 | -33.2614353328 | 19.4493423977 |
| C | -1.7950399352 | -32.3117991224 | 19.1667657617 |
| N | -1.8170630137 | -30.9985277677 | 19.6199113965 |
| C | -2.9262448255 | -32.4249156611 | 18.3907692575 |
| C | -2.9219683705 | -30.3865413564 | 19.1124903996 |
| N | -3.6161790436 | -31.2258248931 | 18.3651265861 |
| C | -3.1080190000 | -25.0239970000 | 19.3379980000 |
| C | -3.3492355314 | -26.4213815053 | 18.7694215940 |
| C | -3.6602023828 | -26.3836743306 | 17.2741985752 |
| C | -3.9327357534 | -27.7465441471 | 16.6400331316 |
| O | -3.7345981274 | -27.8613661120 | 15.4074567581 |
| O | -4.3700614071 | -28.6527501209 | 17.4238008493 |
| C | -8.1409660000 | -23.1040170000 | 14.9750030000 |
| C | -8.8645318066 | -24.1125294253 | 15.9093267267 |
| C | -8.3340525150 | -25.5435348219 | 15.9751645043 |
| C | -7.5024984829 | -25.9824149801 | 17.0207714743 |
| C | -8.7461852035 | -26.5343042471 | 15.0671159222 |
| C | -7.0822429652 | -27.3083602691 | 17.1492864017 |
| C | -8.3348744948 | -27.8649317763 | 15.1782641182 |
| C | -7.4551918571 | -28.3056780524 | 16.2078265682 |
| O | -7.0429723078 | -29.5643617686 | 16.2505940066 |
| C | -9.7309990000 | -33.4130130000 | 20.3670160000 |
| C | -9.7468066369 | -31.8666541835 | 20.4059859009 |
| C | -8.4238741977 | -31.2420188554 | 20.0784987678 |
| N | -7.3637461352 | -31.1746657457 | 20.9782210812 |
| C | -7.9177953209 | -30.7270798204 | 18.9118168719 |
| C | -6.2856698932 | -30.6475765984 | 20.3298681126 |
| N | -6.5909048870 | -30.3764992942 | 19.0768516249 |
| C | 0.6729850000  | -36.5289920000 | 17.1749980000 |
| C | -0.8088832370 | -36.7842368482 | 17.5014618784 |
| C | -1.7470403063 | -36.2546001480 | 16.4356800226 |
| C | -1.7597545378 | -34.8921597699 | 16.0971781879 |
| C | -2.6103003552 | -37.1018136929 | 15.7300710945 |
| C | -2.5907860795 | -34.3858838640 | 15.1034012107 |
| C | -3.4523294086 | -36.6173416832 | 14.7255065457 |
| C | -3.4477816601 | -35.2524861210 | 14.3986919276 |
| O | -4.3031217380 | -34.8196584497 | 13.4498715179 |
| C | -5.7779959485 | -29.1427150307 | 13.5549120720 |
| C | -6.0867643425 | -30.6301659837 | 13.6139440352 |
| C | -4.8941438204 | -31.4172186480 | 14.1655180428 |
| O | -4.5344618689 | -31.2021930689 | 15.3581935460 |
| O | -4.3087410884 | -32.2056896582 | 13.3651622146 |
| H | -5.5147086867 | -35.4981778820 | 20.4234753052 |
| H | -4.1183099715 | -35.9904049201 | 19.4802505562 |

|   |                |                |               |
|---|----------------|----------------|---------------|
| H | -6.3476186089  | -33.0443032352 | 19.4881765230 |
| H | -5.3809938485  | -33.5470734631 | 15.4432016625 |
| H | -5.5720475282  | -37.9583121811 | 19.9455982183 |
| H | 0.1671634726   | -33.0554288982 | 18.7580793189 |
| H | -1.0140584119  | -34.2674598132 | 19.1997834224 |
| H | -3.2656132842  | -33.2785004272 | 17.8278219165 |
| H | -3.1753309520  | -29.3480686440 | 19.2591332567 |
| H | 0.6790083373   | -33.9954581128 | 21.0024463510 |
| H | -4.1806867305  | -26.9105152138 | 19.2891920367 |
| H | -2.4626351095  | -27.0490925234 | 18.9401250155 |
| H | -4.5678072271  | -25.7886879371 | 17.0995547937 |
| H | -2.8523997946  | -25.8986550797 | 16.7141406346 |
| H | -2.2649634030  | -24.5313636387 | 18.8384944786 |
| H | -8.8585302388  | -23.6955835143 | 16.9251815439 |
| H | -9.9212643275  | -24.1475070826 | 15.6102557147 |
| H | -7.1868489220  | -25.2643487883 | 17.7785530571 |
| H | -9.4347510652  | -26.2652436237 | 14.2655341154 |
| H | -6.4401185432  | -27.6041281983 | 17.9705909640 |
| H | -8.7081327465  | -28.6092472932 | 14.4763477157 |
| H | -8.1642022115  | -23.4480079150 | 13.9345409364 |
| H | -10.0920244407 | -31.5248635666 | 21.3916597328 |
| H | -10.4772185952 | -31.4932873007 | 19.6807920735 |
| H | -8.3794999471  | -30.6023547406 | 17.9443985983 |
| H | -5.3159186445  | -30.5134940778 | 20.7846214160 |
| H | -10.7268370614 | -33.8162041820 | 20.5765244379 |
| H | -1.0448258995  | -36.3282324492 | 18.4743416352 |
| H | -0.9736528686  | -37.8611229719 | 17.6291213316 |
| H | -2.6228408184  | -38.1651678494 | 15.9622404975 |
| H | -1.1131195932  | -34.2000067994 | 16.6313478422 |
| H | -4.1160806173  | -37.2802182297 | 14.1782154035 |
| H | -2.6211769014  | -33.3229095934 | 14.8839060241 |
| H | -4.2569462486  | -33.8279320301 | 13.3709494438 |
| H | 0.8794588764   | -35.4574995087 | 17.0839670337 |
| H | -5.3607613224  | -28.7832445850 | 14.4974333558 |
| H | -6.6503970099  | -28.5470192155 | 13.2784814174 |
| H | -6.9052592751  | -30.6976884933 | 14.3390376691 |
| H | -6.3895572589  | -31.0367059459 | 12.6450916099 |
| H | -4.8026344094  | -35.6907816238 | 16.6160010302 |
| H | -7.3986137745  | -31.4372866126 | 21.9517893066 |
| H | -1.1194355026  | -30.5610122434 | 20.2018223765 |
| H | -8.6216007137  | -22.1204532129 | 15.0215427912 |
| H | -7.0901374851  | -22.9881066690 | 15.2637575312 |
| H | -3.9893449129  | -24.3866921715 | 19.1971099385 |
| H | -2.8873818689  | -25.0513985483 | 20.4116358845 |

|    |               |                |               |
|----|---------------|----------------|---------------|
| H  | 0.9450084179  | -36.9987642941 | 16.2243356713 |
| H  | 1.3266827143  | -36.9315913971 | 17.9570405649 |
| H  | -5.5368350988 | -37.6457932474 | 18.2050882418 |
| H  | -6.9487856168 | -37.1612148267 | 19.1550172318 |
| H  | -9.4075719021 | -33.7667011005 | 19.3835439977 |
| H  | -9.0362669355 | -33.8207229209 | 21.1103453854 |
| S  | -4.5357181400 | -28.6952554943 | 12.2575184122 |
| C  | -2.9529702727 | -29.3387306127 | 12.9022246189 |
| C  | -4.3681290510 | -26.9150802988 | 12.6185921722 |
| H  | -3.6172554840 | -26.5070955529 | 11.9385104345 |
| H  | -5.3398924211 | -26.4560578384 | 12.4246141599 |
| H  | -4.0799647195 | -26.8131723306 | 13.6704548830 |
| H  | -2.9157321464 | -29.1157884343 | 13.9719682052 |
| H  | -2.9425822260 | -30.4120659319 | 12.7073416833 |
| H  | -2.1621868133 | -28.8301037282 | 12.3456717694 |
| H  | 0.3133404268  | -32.2771938055 | 21.1593428105 |
| H  | -0.9042989477 | -33.4802023496 | 21.6170760162 |
| Co | -5.4073159159 | -30.4247536514 | 17.1758533414 |

### TS<sub>Co(II),IV</sub>

|   |                |                 |                |
|---|----------------|-----------------|----------------|
| C | -5.8569950000# | -37.2389910000# | 19.1709910000# |
| C | -5.1508950000# | -35.9010150000# | 19.4508540000# |
| C | -5.4603950000# | -34.8100060000# | 18.4733800000# |
| N | -5.2646190000# | -34.9406940000# | 17.1079120000# |
| C | -5.8519510000# | -33.5032510000# | 18.6417350000# |
| C | -5.5177240000# | -33.7388100000# | 16.5251550000# |
| N | -5.8671930000  | -32.8376370000  | 17.4272000000  |
| C | -0.1150060000  | -33.2509900000  | 20.8939940000  |
| C | -0.5246780000  | -33.1974330000  | 19.4092820000  |
| C | -1.6429130000  | -32.2493340000  | 19.0972220000  |
| N | -1.6412630000  | -30.9197940000  | 19.5001340000  |
| C | -2.8009840000  | -32.3881450000  | 18.3699850000  |
| C | -2.7578770000  | -30.3210060000  | 19.0081550000  |
| N | -3.4822300000  | -31.1859280000  | 18.3204830000  |
| C | -3.1080190000  | -25.0239970000  | 19.3379980000  |
| C | -3.2432240000  | -26.4495900000  | 18.8095230000  |
| C | -3.4983020000  | -26.4904270000  | 17.3001400000  |
| C | -3.6610590000  | -27.9100800000  | 16.7596320000  |
| O | -3.0343680000  | -28.2495380000  | 15.7338390000  |
| O | -4.4763120000  | -28.6398080000  | 17.4261130000  |
| C | -8.1409660000  | -23.1040170000  | 14.9750030000  |
| C | -8.8571780000  | -24.1526610000  | 15.8582110000  |
| C | -8.2831950000  | -25.5637010000  | 15.8569090000  |
| C | -7.5877360000  | -26.0783100000  | 16.9643420000  |

|   |               |                |               |
|---|---------------|----------------|---------------|
| C | -8.5018880000 | -26.4480140000 | 14.7902240000 |
| C | -7.1337250000 | -27.3971430000 | 17.0188660000 |
| C | -8.0616700000 | -27.7745440000 | 14.8283050000 |
| C | -7.3663710000 | -28.2877660000 | 15.9493020000 |
| O | -6.9645830000 | -29.5765430000 | 15.9773130000 |
| C | -9.7309990000 | -33.4130130000 | 20.3670160000 |
| C | -9.8490660000 | -31.9026670000 | 20.0615380000 |
| C | -8.5378900000 | -31.2483290000 | 19.7515200000 |
| N | -7.5641650000 | -30.9981420000 | 20.7141370000 |
| C | -7.9628890000 | -30.8606000000 | 18.5683780000 |
| C | -6.4650570000 | -30.4918090000 | 20.0875980000 |
| N | -6.6771150000 | -30.4078440000 | 18.7893130000 |
| C | 0.6729850000  | -36.5289920000 | 17.1749980000 |
| C | -0.8184310000 | -36.7291590000 | 17.4938950000 |
| C | -1.7467940000 | -36.1865310000 | 16.4258720000 |
| C | -1.7540380000 | -34.8241630000 | 16.0863010000 |
| C | -2.6257000000 | -37.0265310000 | 15.7292870000 |
| C | -2.6034880000 | -34.3080010000 | 15.1106300000 |
| C | -3.4807740000 | -36.5338020000 | 14.7406880000 |
| C | -3.4819970000 | -35.1648190000 | 14.4190560000 |
| O | -4.3627130000 | -34.7341400000 | 13.4994780000 |
| C | -5.1522080000 | -28.8622310000 | 13.5765430000 |
| C | -5.8274210000 | -30.1098460000 | 13.6757680000 |
| C | -4.9846520000 | -31.2782530000 | 14.1483890000 |
| O | -4.5551450000 | -31.2881290000 | 15.3489170000 |
| O | -4.7264030000 | -32.1722270000 | 13.2996260000 |
| H | -5.4185400000 | -35.5395710000 | 20.4498210000 |
| H | -4.0640830000 | -36.0699610000 | 19.4668300000 |
| H | -6.0873270000 | -32.9975950000 | 19.5649390000 |
| H | -5.4102840000 | -33.5628930000 | 15.4699870000 |
| H | -5.5904450000 | -37.9842090000 | 19.9267560000 |
| H | 0.3568060000  | -32.9421380000 | 18.8036880000 |
| H | -0.8376570000 | -34.1914850000 | 19.0788420000 |
| H | -3.1704710000 | -33.2630670000 | 17.8623750000 |
| H | -3.0057830000 | -29.2807910000 | 19.1413200000 |
| H | 0.6869550000  | -33.9795940000 | 21.0439180000 |
| H | -4.0657350000 | -26.9695120000 | 19.3133780000 |
| H | -2.3244230000 | -27.0105150000 | 19.0370440000 |
| H | -4.4345350000 | -25.9593520000 | 17.0792580000 |
| H | -2.6906460000 | -25.9926560000 | 16.7545180000 |
| H | -2.2787760000 | -24.4981090000 | 18.8509530000 |
| H | -8.8735190000 | -23.7837540000 | 16.8914150000 |
| H | -9.9082920000 | -24.2025570000 | 15.5428660000 |
| H | -7.4077150000 | -25.4307470000 | 17.8215640000 |

|   |                |                |               |
|---|----------------|----------------|---------------|
| H | -9.0598380000  | -26.1059950000 | 13.9198270000 |
| H | -6.5856320000  | -27.7634890000 | 17.8764340000 |
| H | -8.2863690000  | -28.4431320000 | 14.0016600000 |
| H | -8.1356720000  | -23.4146580000 | 13.9245690000 |
| H | -10.3370370000 | -31.3929200000 | 20.9034220000 |
| H | -10.5022540000 | -31.7558160000 | 19.1957360000 |
| H | -8.3519540000  | -30.8909660000 | 17.5627680000 |
| H | -5.5481820000  | -30.2299300000 | 20.5935190000 |
| H | -10.7178740000 | -33.8511060000 | 20.5440820000 |
| H | -1.0417410000  | -36.2566600000 | 18.4616160000 |
| H | -1.0174990000  | -37.7982390000 | 17.6347010000 |
| H | -2.6424680000  | -38.0898340000 | 15.9600860000 |
| H | -1.0922740000  | -34.1374130000 | 16.6078640000 |
| H | -4.1562070000  | -37.1907470000 | 14.2011780000 |
| H | -2.6362030000  | -33.2411120000 | 14.9113880000 |
| H | -4.3951700000  | -33.7335420000 | 13.4438270000 |
| H | 0.9142890000   | -35.4663260000 | 17.0676560000 |
| H | -4.5202900000  | -28.5632040000 | 14.4089400000 |
| H | -5.6457320000  | -28.0551110000 | 13.0412500000 |
| H | -6.5112430000  | -29.8484080000 | 14.7462690000 |
| H | -6.4644720000  | -30.3758220000 | 12.8313060000 |
| H | -4.8759430000  | -35.7390360000 | 16.6191060000 |
| H | -7.6693320000  | -31.1328450000 | 21.7081250000 |
| H | -0.9200120000  | -30.4643590000 | 20.0376410000 |
| H | -8.6426440000  | -22.1327880000 | 15.0415180000 |
| H | -7.0988210000  | -22.9765470000 | 15.2872060000 |
| H | -4.0205180000  | -24.4485420000 | 19.1433860000 |
| H | -2.9260280000  | -25.0044980000 | 20.4184770000 |
| H | 0.9361310000   | -37.0223430000 | 16.2341590000 |
| H | 1.3066100000   | -36.9396070000 | 17.9687610000 |
| H | -5.5684220000  | -37.6406200000 | 18.1935630000 |
| H | -6.9445170000  | -37.1167050000 | 19.1735980000 |
| H | -9.2580770000  | -33.9360150000 | 19.5305810000 |
| H | -9.1181840000  | -33.5902920000 | 21.2580380000 |
| S | -3.2729570000  | -28.9079570000 | 12.1889530000 |
| C | -2.2308930000  | -30.0345290000 | 13.1789850000 |
| C | -2.6039920000  | -27.2986750000 | 12.7318690000 |
| H | -1.5925390000  | -27.1731430000 | 12.3365330000 |
| H | -3.2510330000  | -26.5199320000 | 12.3203580000 |
| H | -2.6041900000  | -27.2634130000 | 13.8252600000 |
| H | -2.3853990000  | -29.8264150000 | 14.2401950000 |
| H | -2.5486050000  | -31.0494380000 | 12.9364850000 |
| H | -1.1868620000  | -29.8842520000 | 12.8920820000 |
| H | 0.2541540000   | -32.2817510000 | 21.2484630000 |

|    |               |                |               |
|----|---------------|----------------|---------------|
| H  | -0.9630930000 | -33.5362290000 | 21.5242150000 |
| Co | -5.2555130000 | -30.5048960000 | 17.1302080000 |

**Prod<sub>Co(m),IV</sub>**

|   |               |                |               |
|---|---------------|----------------|---------------|
| C | -5.8569950000 | -37.2389910000 | 19.1709910000 |
| C | -4.5956625813 | -36.3724658527 | 18.9913517376 |
| C | -4.8324688340 | -35.1471171352 | 18.1674209277 |
| N | -4.9856290851 | -35.1851130502 | 16.7909526978 |
| C | -4.9691214319 | -33.8220899930 | 18.4947289218 |
| C | -5.1741978451 | -33.9199563481 | 16.3397764364 |
| N | -5.1723895719 | -33.0662653143 | 17.3501413001 |
| C | -0.1150060000 | -33.2509900000 | 20.8939940000 |
| C | -0.0407952245 | -32.8221644095 | 19.4161818661 |
| C | -1.2153634372 | -31.9926269514 | 19.0104737657 |
| N | -1.4576274557 | -30.7218492374 | 19.5206093104 |
| C | -2.2926713450 | -32.2561160499 | 18.2063658671 |
| C | -2.6309191845 | -30.2693391874 | 19.0119477418 |
| N | -3.1614385143 | -31.1807524912 | 18.2173637824 |
| C | -3.1080190000 | -25.0239970000 | 19.3379980000 |
| C | -3.2294944270 | -26.4576303463 | 18.8132229277 |
| C | -4.1805158558 | -26.5922988904 | 17.6079415348 |
| C | -4.1205422569 | -28.0223219878 | 17.0669683131 |
| O | -3.2518809305 | -28.3138415585 | 16.2301789021 |
| O | -4.9487139583 | -28.8536161315 | 17.6143789811 |
| C | -8.1409660000 | -23.1040170000 | 14.9750030000 |
| C | -9.1175624211 | -24.2043690184 | 14.5256819373 |
| C | -8.6658668721 | -25.6140390185 | 14.8598210495 |
| C | -9.4241926430 | -26.4509277790 | 15.6875448386 |
| C | -7.4858569941 | -26.1436878403 | 14.3161103283 |
| C | -9.0447354668 | -27.7692690015 | 15.9414603433 |
| C | -7.0880000374 | -27.4558027731 | 14.5603511204 |
| C | -7.8808197214 | -28.2894776178 | 15.3633152849 |
| O | -7.5937135265 | -29.5959230468 | 15.5871804472 |
| C | -9.7309990000 | -33.4130130000 | 20.3670160000 |
| C | -9.9512641151 | -31.9174491396 | 20.1056589094 |
| C | -8.7710977719 | -31.2955348211 | 19.4278115662 |
| N | -8.6485048695 | -29.9313369381 | 19.1921385857 |
| C | -7.6167301559 | -31.8385535328 | 18.9294204983 |
| C | -7.4620392712 | -29.7016113329 | 18.5801318037 |
| N | -6.8097009267 | -30.8403801804 | 18.4134894324 |
| C | 0.6729850000  | -36.5289920000 | 17.1749980000 |
| C | -0.8446792138 | -36.6884069919 | 17.3712754857 |
| C | -1.6574296665 | -36.2407272944 | 16.1726432801 |
| C | -1.6149131092 | -34.9049616513 | 15.7439079188 |



|   |                |                |               |
|---|----------------|----------------|---------------|
| C | -2.4732566517  | -37.1215630939 | 15.4523582572 |
| C | -2.3814377922  | -34.4506264047 | 14.6775329248 |
| C | -3.2507931814  | -36.6855037325 | 14.3729174564 |
| C | -3.2290304981  | -35.3363548342 | 13.9906830726 |
| O | -4.0394163369  | -34.9325659220 | 12.9857978657 |
| C | -4.0454009262  | -29.0098983122 | 13.1929263044 |
| C | -4.4788732210  | -30.2554593458 | 12.9660714240 |
| C | -4.7851598746  | -31.2223090751 | 14.0644991315 |
| O | -5.1653116408  | -30.7328081384 | 15.1986886056 |
| O | -4.6462140763  | -32.4420854273 | 13.8232971782 |
| H | -4.2195687622  | -36.0587030900 | 19.9715392051 |
| H | -3.7975869214  | -36.9685385889 | 18.5278825764 |
| H | -4.9045130686  | -33.3579246927 | 19.4677690209 |
| H | -5.2506777358  | -33.6338345824 | 15.3000229824 |
| H | -5.6405979639  | -38.1251519291 | 19.7764318100 |
| H | 0.8942208335   | -32.2769216753 | 19.2294853875 |
| H | -0.0140962474  | -33.7072900234 | 18.7715523344 |
| H | -2.5052008287  | -33.1400020782 | 17.6292301916 |
| H | -3.0625040516  | -29.3036026207 | 19.2165493132 |
| H | 0.7479830370   | -33.8669628684 | 21.1662414964 |
| H | -3.5868456800  | -27.1117196901 | 19.6216616604 |
| H | -2.2372434599  | -26.8237025002 | 18.5157572670 |
| H | -5.2040543534  | -26.3400455394 | 17.9052663187 |
| H | -3.8653865280  | -25.9072987586 | 16.8143503142 |
| H | -2.7236116363  | -24.3547996399 | 18.5598967353 |
| H | -10.0998539789 | -24.0234447652 | 14.9795230720 |
| H | -9.2669679016  | -24.1213658836 | 13.4399064207 |
| H | -10.3435295527 | -26.0707052518 | 16.1294977439 |
| H | -6.8698872713  | -25.5235527995 | 13.6678435625 |
| H | -9.6541276194  | -28.4238978285 | 16.5587601029 |
| H | -6.1826575196  | -27.8535978905 | 14.1131812082 |
| H | -7.1574334833  | -23.2330890737 | 14.5111965093 |
| H | -10.1457510000 | -31.4011865996 | 21.0567104707 |
| H | -10.8533184223 | -31.7777306922 | 19.4930509097 |
| H | -7.3152770449  | -32.8716315232 | 18.8991994648 |
| H | -7.1059712830  | -28.7402938165 | 18.2479375455 |
| H | -10.5975155252 | -33.8510622345 | 20.8701440330 |
| H | -1.1539769466  | -36.1109753442 | 18.2556601748 |
| H | -1.0746626398  | -37.7367230613 | 17.5985956728 |
| H | -2.5115811359  | -38.1705696072 | 15.7405433319 |
| H | -0.9691670886  | -34.1964045575 | 16.2582560439 |
| H | -3.8853719171  | -37.3732316316 | 13.8213713770 |
| H | -2.3646866987  | -33.4075461623 | 14.3867107861 |
| H | -4.1598502318  | -33.9587790186 | 13.0357983870 |

|    |               |                |               |
|----|---------------|----------------|---------------|
| H  | 0.9410570354  | -35.4849167033 | 16.9807058798 |
| H  | -3.9223208629 | -28.6357839111 | 14.2060770830 |
| H  | -3.7576074316 | -28.3621880028 | 12.3682341369 |
| H  | -6.6948031723 | -29.8412337378 | 15.2721420274 |
| H  | -4.5362280525 | -30.6720840890 | 11.9629487066 |
| H  | -4.7798718117 | -35.9747317890 | 16.1899938237 |
| H  | -9.3369111634 | -29.2254189405 | 19.4059821179 |
| H  | -0.8477694105 | -30.2036354490 | 20.1352735046 |
| H  | -8.5134029050 | -22.1108117652 | 14.7009298366 |
| H  | -7.9984155415 | -23.1284070786 | 16.0608775225 |
| H  | -4.0825964011 | -24.6359438002 | 19.6565055033 |
| H  | -2.4278872442 | -24.9662780637 | 20.1954382293 |
| H  | 1.0176109394  | -37.1198499246 | 16.3204074788 |
| H  | 1.2231616403  | -36.8580326427 | 18.0634669930 |
| H  | -6.2432178661 | -37.5757384842 | 18.2031895672 |
| H  | -6.6495180078 | -36.6681977304 | 19.6653652553 |
| H  | -9.5756816744 | -33.9533686311 | 19.4281976338 |
| H  | -8.8513318019 | -33.5711526742 | 20.9985274112 |
| S  | 0.1081425643  | -29.9021022168 | 15.0262283372 |
| C  | -1.4593684357 | -30.8430307536 | 15.0464437488 |
| C  | -0.0691580446 | -29.0024210041 | 16.6088630824 |
| H  | -0.0396047148 | -29.6935765943 | 17.4572093301 |
| H  | 0.7746266725  | -28.3100544030 | 16.6837688332 |
| H  | -1.0106745419 | -28.4480714675 | 16.6154704239 |
| H  | -2.2847642032 | -30.1875323212 | 15.3311269378 |
| H  | -1.6274063918 | -31.2142283992 | 14.0330625040 |
| H  | -1.4016622628 | -31.6851777097 | 15.7396806057 |
| H  | -0.1292550337 | -32.3826626744 | 21.5625162565 |
| H  | -1.0249718317 | -33.8299522233 | 21.0808590247 |
| Co | -5.0241837169 | -30.8511369898 | 17.2471102927 |

### React<sub>Zn(II),I</sub>

|   |               |                |               |
|---|---------------|----------------|---------------|
| C | -5.8569950000 | -37.2389910000 | 19.1709910000 |
| C | -5.1777408150 | -35.8828040527 | 19.4224552841 |
| C | -5.5277407557 | -34.8253780687 | 18.4240564735 |
| N | -5.2213916265 | -34.9237667495 | 17.0773641900 |
| C | -6.0846569406 | -33.5773036037 | 18.5608581435 |
| C | -5.5751947296 | -33.7533195391 | 16.4792733876 |
| N | -6.0962593227 | -32.9066056278 | 17.3511780288 |
| C | -0.1150060000 | -33.2509900000 | 20.8939940000 |
| C | -0.6396968655 | -33.2706699949 | 19.4415332955 |
| C | -1.7490728455 | -32.3044907349 | 19.1369698361 |
| N | -1.7138731672 | -30.9660962628 | 19.5059428252 |
| C | -2.9195023933 | -32.4305440372 | 18.4234754281 |

|   |               |                |               |
|---|---------------|----------------|---------------|
| C | -2.8268995431 | -30.3554372872 | 19.0092213928 |
| N | -3.5780757856 | -31.2171590851 | 18.3481794929 |
| C | -3.1080190000 | -25.0239970000 | 19.3379980000 |
| C | -3.3319489830 | -26.4218340794 | 18.7687716675 |
| C | -3.7285280961 | -26.3784593179 | 17.2942114747 |
| C | -4.0158895782 | -27.7438565610 | 16.6775588893 |
| O | -3.8005087471 | -27.8884792553 | 15.4498018204 |
| O | -4.4941028651 | -28.6243401060 | 17.4650210866 |
| C | -8.1409660000 | -23.1040170000 | 14.9750030000 |
| C | -9.0003436757 | -24.0881269629 | 15.8087356139 |
| C | -8.4987277832 | -25.5229668473 | 15.9170477859 |
| C | -7.6462123909 | -25.9359183160 | 16.9554465440 |
| C | -8.9334421414 | -26.5300691241 | 15.0401096848 |
| C | -7.2324292250 | -27.2599886901 | 17.1077505272 |
| C | -8.5302877782 | -27.8605741228 | 15.1763442085 |
| C | -7.6394987036 | -28.2777165775 | 16.2033461680 |
| O | -7.2432526792 | -29.5384199654 | 16.2853183850 |
| C | -9.7309990000 | -33.4130130000 | 20.3670160000 |
| C | -9.7063411209 | -31.8822944837 | 20.5773766681 |
| C | -8.4000923644 | -31.2640872184 | 20.1842388327 |
| N | -7.2824454782 | -31.2381925416 | 21.0137626345 |
| C | -7.9565748902 | -30.7531802120 | 18.9916942243 |
| C | -6.2326361247 | -30.7384937032 | 20.3028681246 |
| N | -6.6127832282 | -30.4461620985 | 19.0753397555 |
| C | 0.6729850000  | -36.5289920000 | 17.1749980000 |
| C | -0.8160618739 | -36.7686670789 | 17.4801554955 |
| C | -1.7380207117 | -36.2236135777 | 16.4075314666 |
| C | -1.7685512033 | -34.8534460672 | 16.1028245701 |
| C | -2.5754835631 | -37.0670895814 | 15.6664499967 |
| C | -2.5957483629 | -34.3363129878 | 15.1101166476 |
| C | -3.4104759501 | -36.5716824276 | 14.6620429946 |
| C | -3.4272735413 | -35.1986097725 | 14.3709692246 |
| O | -4.2788868282 | -34.7602229105 | 13.4222331932 |
| C | -5.8953233870 | -29.0643683988 | 13.5900709207 |
| C | -6.2248272896 | -30.5493251509 | 13.6162955411 |
| C | -5.0513144037 | -31.3724437684 | 14.1584442473 |
| O | -4.7010649972 | -31.1935081933 | 15.3623485055 |
| O | -4.4736851208 | -32.1513724926 | 13.3478458340 |
| H | -5.4493700964 | -35.5079602016 | 20.4158779595 |
| H | -4.0864117638 | -36.0222393200 | 19.4347221711 |
| H | -6.4527024315 | -33.1231187063 | 19.4656659433 |
| H | -5.4072486455 | -33.5664730957 | 15.4339691046 |
| H | -5.5668322546 | -37.9705792284 | 19.9325470298 |
| H | 0.2045595224  | -33.0896939362 | 18.7594165691 |

|   |                |                |               |
|---|----------------|----------------|---------------|
| H | -1.0062789584  | -34.2727796896 | 19.1998704942 |
| H | -3.3096107959  | -33.3108153466 | 17.9395133939 |
| H | -3.0489622349  | -29.3049851839 | 19.1138061714 |
| H | 0.6684354079   | -34.0031912373 | 21.0261205767 |
| H | -4.1153326289  | -26.9451763403 | 19.3276132036 |
| H | -2.4146574545  | -27.0181123147 | 18.8812383461 |
| H | -4.6558522280  | -25.7990619816 | 17.1777685110 |
| H | -2.9624344838  | -25.8771413844 | 16.6923221114 |
| H | -2.3139132615  | -24.4956485788 | 18.7965106165 |
| H | -9.1050569667  | -23.6751422468 | 16.8211508019 |
| H | -10.0137615497 | -24.1002661644 | 15.3854977589 |
| H | -7.3103466262  | -25.1989505049 | 17.6858106809 |
| H | -9.6318657279  | -26.2733432368 | 14.2431713033 |
| H | -6.5732959891  | -27.5398815283 | 17.9216053877 |
| H | -8.9184067143  | -28.6206571597 | 14.5000561042 |
| H | -8.0529157238  | -23.4459506625 | 13.9371880120 |
| H | -9.9401339722  | -31.6440532206 | 21.6239455769 |
| H | -10.4942708204 | -31.4189773086 | 19.9744138723 |
| H | -8.4765771430  | -30.5988787680 | 18.0585089130 |
| H | -5.2306487777  | -30.6372828042 | 20.6905609304 |
| H | -10.7081157863 | -33.8277437314 | 20.6351708701 |
| H | -1.0594509743  | -36.3164845701 | 18.4527283947 |
| H | -0.9939610928  | -37.8444649847 | 17.5991066191 |
| H | -2.5751060409  | -38.1357950308 | 15.8731215984 |
| H | -1.1437521016  | -34.1640347105 | 16.6654333575 |
| H | -4.0572669750  | -37.2306615393 | 14.0904835926 |
| H | -2.6444048809  | -33.2677789288 | 14.9214266158 |
| H | -4.2767889336  | -33.7657503033 | 13.3763206832 |
| H | 0.8903837095   | -35.4591397365 | 17.0885771023 |
| H | -5.4630577554  | -28.7297565283 | 14.5348223948 |
| H | -6.7637321789  | -28.4515054248 | 13.3388175031 |
| H | -7.0515463225  | -30.6214440230 | 14.3319226347 |
| H | -6.5279251398  | -30.9290186459 | 12.6367652878 |
| H | -4.7299113753  | -35.6796318795 | 16.6142493895 |
| H | -7.2613525809  | -31.5176255737 | 21.9830210229 |
| H | -0.9791762697  | -30.5146882545 | 20.0286541002 |
| H | -8.5867160131  | -22.1027242595 | 14.9691149266 |
| H | -7.1279364352  | -23.0263656729 | 15.3860771017 |
| H | -4.0183269286  | -24.4179219637 | 19.2560535487 |
| H | -2.8241386788  | -25.0529746418 | 20.3966417569 |
| H | 0.9534890845   | -36.9998980945 | 16.2272945877 |
| H | 1.3113498727   | -36.9395425525 | 17.9654470498 |
| H | -5.5744720320  | -37.6461895497 | 18.1936234951 |
| H | -6.9468538879  | -37.1377419055 | 19.1863432755 |

|    |               |                |               |
|----|---------------|----------------|---------------|
| H  | -9.5202437408 | -33.6576561961 | 19.3219992184 |
| H  | -8.9707237685 | -33.9078980976 | 20.9818421636 |
| S  | -4.6593071549 | -28.6064860107 | 12.2912736465 |
| C  | -3.0831017280 | -29.3036094007 | 12.8955572479 |
| C  | -4.4454774959 | -26.8411020921 | 12.6968668256 |
| H  | -3.6940551594 | -26.4331463941 | 12.0173327375 |
| H  | -5.4085791417 | -26.3544098099 | 12.5286407746 |
| H  | -4.1404578162 | -26.7754915667 | 13.7470167465 |
| H  | -3.0236675487 | -29.1101911076 | 13.9698396231 |
| H  | -3.1005715076 | -30.3713778233 | 12.6727565104 |
| H  | -2.2884786775 | -28.7990953766 | 12.3407666848 |
| H  | 0.3182560015  | -32.2785563579 | 21.1563754137 |
| H  | -0.9198599745 | -33.4619871781 | 21.6052937681 |
| Zn | -5.5553444328 | -30.3732565334 | 17.1255380460 |

### TS<sub>Zn(II),I</sub>

|   |                |                 |                |
|---|----------------|-----------------|----------------|
| C | -5.8569950000# | -37.2389910000# | 19.1709910000# |
| C | -5.1490050000# | -35.8974320000# | 19.4230110000# |
| C | -5.4778580000# | -34.8270630000# | 18.4309630000# |
| N | -5.2412060000# | -34.9582490000# | 17.0720570000# |
| C | -5.9444320000# | -33.5426340000# | 18.5774270000# |
| C | -5.5457670000# | -33.7752870000# | 16.4732970000# |
| N | -5.9678520000# | -32.8883510000  | 17.3577660000  |
| C | -0.1150060000  | -33.2509900000  | 20.8939940000  |
| C | -0.5855080000  | -33.2601350000  | 19.4263410000  |
| C | -1.6857250000  | -32.2932000000  | 19.1047560000  |
| N | -1.6566920000  | -30.9583320000  | 19.4870950000  |
| C | -2.8464870000  | -32.4178370000  | 18.3780840000  |
| C | -2.7616440000  | -30.3442590000  | 18.9860000000  |
| N | -3.5041440000  | -31.2033480000  | 18.3095480000  |
| C | -3.1080190000  | -25.0239970000  | 19.3379980000  |
| C | -3.2340340000  | -26.4406620000  | 18.7871020000  |
| C | -3.5167720000  | -26.4597470000  | 17.2825630000  |
| C | -3.7099030000  | -27.8693790000  | 16.7286840000  |
| O | -3.1625570000  | -28.1853900000  | 15.6515940000  |
| O | -4.4637550000  | -28.6223650000  | 17.4409440000  |
| C | -8.1409660000  | -23.1040170000  | 14.9750030000  |
| C | -8.9517520000  | -24.1795530000  | 15.7346110000  |
| C | -8.3720190000  | -25.5872260000  | 15.7487680000  |
| C | -7.6374860000  | -26.0723030000  | 16.8439490000  |
| C | -8.6124890000  | -26.4920690000  | 14.7044650000  |
| C | -7.1676460000  | -27.3850480000  | 16.9071060000  |
| C | -8.1586330000  | -27.8135010000  | 14.7528870000  |
| C | -7.4268870000  | -28.2960350000  | 15.8616800000  |

|   |               |                |               |
|---|---------------|----------------|---------------|
| O | -7.0113130000 | -29.5821850000 | 15.9030420000 |
| C | -9.7309990000 | -33.4130130000 | 20.3670160000 |
| C | -9.8439410000 | -31.8950580000 | 20.1017120000 |
| C | -8.5350030000 | -31.2452950000 | 19.7740840000 |
| N | -7.5351060000 | -31.0253140000 | 20.7173090000 |
| C | -7.9852600000 | -30.8365520000 | 18.5862680000 |
| C | -6.4470110000 | -30.5154430000 | 20.0754600000 |
| N | -6.6899830000 | -30.3990240000 | 18.7849120000 |
| C | 0.6729850000  | -36.5289920000 | 17.1749980000 |
| C | -0.8194260000 | -36.7396600000 | 17.4819940000 |
| C | -1.7413580000 | -36.1949250000 | 16.4097090000 |
| C | -1.7596190000 | -34.8291270000 | 16.0846020000 |
| C | -2.5999520000 | -37.0380090000 | 15.6915800000 |
| C | -2.5982540000 | -34.3133930000 | 15.0991560000 |
| C | -3.4447730000 | -36.5451830000 | 14.6945840000 |
| C | -3.4548310000 | -35.1736300000 | 14.3845510000 |
| O | -4.3232990000 | -34.7457470000 | 13.4521870000 |
| C | -5.2299020000 | -28.8864660000 | 13.4965200000 |
| C | -5.8725360000 | -30.1479260000 | 13.6099250000 |
| C | -5.0035450000 | -31.2940940000 | 14.0999970000 |
| O | -4.5708890000 | -31.2754600000 | 15.2982770000 |
| O | -4.7282550000 | -32.1899600000 | 13.2597230000 |
| H | -5.4064630000 | -35.5206260000 | 20.4189080000 |
| H | -4.0615200000 | -36.0622720000 | 19.4283130000 |
| H | -6.2313060000 | -33.0462920000 | 19.4911220000 |
| H | -5.4199910000 | -33.6011180000 | 15.4193330000 |
| H | -5.5792090000 | -37.9758630000 | 19.9311330000 |
| H | 0.2785700000  | -33.0681550000 | 18.7739340000 |
| H | -0.9426350000 | -34.2591080000 | 19.1619820000 |
| H | -3.2325280000 | -33.2936480000 | 17.8841130000 |
| H | -2.9862650000 | -29.2964600000 | 19.1020870000 |
| H | 0.6648350000  | -34.0019280000 | 21.0497250000 |
| H | -4.0405000000 | -26.9784030000 | 19.2970280000 |
| H | -2.3057460000 | -26.9957470000 | 18.9880880000 |
| H | -4.4507940000 | -25.9156690000 | 17.0834780000 |
| H | -2.7168400000 | -25.9628910000 | 16.7248390000 |
| H | -2.2959550000 | -24.4764880000 | 18.8456110000 |
| H | -9.0849520000 | -23.8453470000 | 16.7713570000 |
| H | -9.9595840000 | -24.2199190000 | 15.3008010000 |
| H | -7.4405480000 | -25.4077580000 | 17.6841260000 |
| H | -9.1989310000 | -26.1702480000 | 13.8453240000 |
| H | -6.5928350000 | -27.7295930000 | 17.7569590000 |
| H | -8.4002890000 | -28.5005650000 | 13.9464680000 |
| H | -8.0199000000 | -23.3778840000 | 13.9213270000 |

|    |                |                |               |
|----|----------------|----------------|---------------|
| H  | -10.3055760000 | -31.4018870000 | 20.9679450000 |
| H  | -10.5175230000 | -31.7216080000 | 19.2567320000 |
| H  | -8.4023560000  | -30.8430780000 | 17.5913180000 |
| H  | -5.5152390000  | -30.2741710000 | 20.5639950000 |
| H  | -10.7170330000 | -33.8477930000 | 20.5565100000 |
| H  | -1.0518360000  | -36.2746770000 | 18.4509060000 |
| H  | -1.0137290000  | -37.8107270000 | 17.6140660000 |
| H  | -2.6084960000  | -38.1035660000 | 15.9120660000 |
| H  | -1.1156790000  | -34.1402890000 | 16.6253070000 |
| H  | -4.1058410000  | -37.2037470000 | 14.1396460000 |
| H  | -2.6387850000  | -33.2451860000 | 14.9081350000 |
| H  | -4.3685420000  | -33.7458560000 | 13.4040470000 |
| H  | 0.9080530000   | -35.4642140000 | 17.0749510000 |
| H  | -4.6038850000  | -28.5586560000 | 14.3236650000 |
| H  | -5.7379510000  | -28.1006500000 | 12.9435380000 |
| H  | -6.5649750000  | -29.8742920000 | 14.6779440000 |
| H  | -6.5050340000  | -30.4396820000 | 12.7706850000 |
| H  | -4.8061340000  | -35.7425410000 | 16.5996600000 |
| H  | -7.6142600000  | -31.1893640000 | 21.7093510000 |
| H  | -0.9279860000  | -30.5109010000 | 20.0211650000 |
| H  | -8.6444890000  | -22.1325210000 | 15.0211570000 |
| H  | -7.1395460000  | -22.9941160000 | 15.4050280000 |
| H  | -4.0319710000  | -24.4578890000 | 19.1716540000 |
| H  | -2.9055470000  | -25.0210760000 | 20.4150230000 |
| H  | 0.9458100000   | -37.0155980000 | 16.2333860000 |
| H  | 1.3035950000   | -36.9399910000 | 17.9710050000 |
| H  | -5.5837920000  | -37.6508650000 | 18.1934760000 |
| H  | -6.9443360000  | -37.1165420000 | 19.1883530000 |
| H  | -9.2816660000  | -33.9191540000 | 19.5076270000 |
| H  | -9.0993970000  | -33.6168850000 | 21.2390630000 |
| S  | -3.3274700000  | -28.9043760000 | 12.1096290000 |
| C  | -2.2715940000  | -29.9936760000 | 13.1259020000 |
| C  | -2.7025430000  | -27.2727200000 | 12.6383240000 |
| H  | -1.6880250000  | -27.1298550000 | 12.2567900000 |
| H  | -3.3601490000  | -26.5150060000 | 12.2048900000 |
| H  | -2.7204090000  | -27.2194650000 | 13.7307420000 |
| H  | -2.4402110000  | -29.7744040000 | 14.1824570000 |
| H  | -2.5667470000  | -31.0185130000 | 12.8965310000 |
| H  | -1.2277700000  | -29.8274250000 | 12.8471230000 |
| H  | 0.3068000000   | -32.2804220000 | 21.1796340000 |
| H  | -0.9445150000  | -33.4686130000 | 21.5739360000 |
| Zn | -5.3070520000  | -30.4538760000 | 17.0508160000 |

**Prod<sub>Zn(II),I</sub>**

|   |               |                |               |
|---|---------------|----------------|---------------|
| C | -5.8569950000 | -37.2389910000 | 19.1709910000 |
| C | -4.8143094729 | -36.1117489391 | 19.2956289138 |
| C | -5.0667706431 | -34.9295829360 | 18.4108944714 |
| N | -4.8363451722 | -34.9416300862 | 17.0440695374 |
| C | -5.4956558404 | -33.6525765695 | 18.6778228313 |
| C | -5.1053672715 | -33.7084337331 | 16.5491755181 |
| N | -5.5047059607 | -32.8968876278 | 17.5178158308 |
| C | -0.1150060000 | -33.2509900000 | 20.8939940000 |
| C | -0.1345779148 | -32.9277753749 | 19.3863663056 |
| C | -1.2642808742 | -32.0291981426 | 18.9915495087 |
| N | -1.2843092447 | -30.6668059731 | 19.2661710618 |
| C | -2.4709399030 | -32.2785639062 | 18.3885373797 |
| C | -2.4588961811 | -30.1518900273 | 18.8197122202 |
| N | -3.2017141698 | -31.1087988122 | 18.2888408612 |
| C | -3.1080190000 | -25.0239970000 | 19.3379980000 |
| C | -3.3435422516 | -26.3963011842 | 18.7153847831 |
| C | -4.3557465584 | -26.3682481962 | 17.5618483651 |
| C | -4.4824016425 | -27.7458737024 | 16.9152406255 |
| O | -4.2599885852 | -27.8879376886 | 15.7045118026 |
| O | -4.7827269053 | -28.6913337264 | 17.7481722910 |
| C | -8.1409660000 | -23.1040170000 | 14.9750030000 |
| C | -9.1222244626 | -23.9847460353 | 15.7726355193 |
| C | -8.6946241275 | -25.4359334226 | 15.9060054636 |
| C | -8.4462778321 | -26.0199869482 | 17.1551708051 |
| C | -8.5604218369 | -26.2516953083 | 14.7731137894 |
| C | -8.0802076496 | -27.3621482092 | 17.2788748156 |
| C | -8.2031843123 | -27.5938732974 | 14.8786059925 |
| C | -7.9563861578 | -28.1569451601 | 16.1372503532 |
| O | -7.6483337390 | -29.4814434160 | 16.2867860134 |
| C | -9.7309990000 | -33.4130130000 | 20.3670160000 |
| C | -9.6316706744 | -31.9035602874 | 20.6664130758 |
| C | -8.3152422164 | -31.3335032574 | 20.2381844578 |
| N | -7.2362136102 | -31.1560687411 | 21.0938153304 |
| C | -7.8357558913 | -30.9993570668 | 18.9978530787 |
| C | -6.1722010395 | -30.7289366091 | 20.3578530820 |
| N | -6.5089404480 | -30.6375603750 | 19.0862354925 |
| C | 0.6729850000  | -36.5289920000 | 17.1749980000 |
| C | -0.8469204867 | -36.5784949999 | 17.4071727418 |
| C | -1.6442574035 | -36.0540620320 | 16.2303339008 |
| C | -1.5296362320 | -34.7146689056 | 15.8253203493 |
| C | -2.5069668608 | -36.8787375617 | 15.4965485826 |
| C | -2.2622783363 | -34.2056337930 | 14.7592029482 |
| C | -3.2620438829 | -36.3826805258 | 14.4279697011 |
| C | -3.1601886153 | -35.0329118764 | 14.0600675002 |



|   |                |                |               |
|---|----------------|----------------|---------------|
| O | -3.9391965708  | -34.5739441106 | 13.0569378488 |
| C | -5.4977709015  | -28.9216888445 | 13.0640771684 |
| C | -5.2824684561  | -30.2406221511 | 12.9959345003 |
| C | -5.0806722826  | -31.0937697383 | 14.2034582727 |
| O | -5.5432161836  | -30.6635003138 | 15.3289642002 |
| O | -4.4727306915  | -32.1798539316 | 14.0694722572 |
| H | -4.7824017925  | -35.7551302476 | 20.3313988775 |
| H | -3.8147124093  | -36.5139803291 | 19.0781632364 |
| H | -5.7779318763  | -33.2298436053 | 19.6297755803 |
| H | -4.9532865778  | -33.4038908894 | 15.5220888995 |
| H | -5.6135664656  | -38.0703074913 | 19.8404757720 |
| H | 0.8225251576   | -32.4781066382 | 19.0896142803 |
| H | -0.2256698003  | -33.8556160202 | 18.8124215087 |
| H | -2.8462824391  | -33.2145565906 | 18.0082088613 |
| H | -2.7478161217  | -29.1138981594 | 18.8654744679 |
| H | 0.7227703838   | -33.9111510557 | 21.1397597865 |
| H | -3.7054863383  | -27.0975996621 | 19.4769148368 |
| H | -2.3868446624  | -26.7922450716 | 18.3417675052 |
| H | -5.3425379739  | -26.0696991721 | 17.9381073179 |
| H | -4.0529447860  | -25.6486544020 | 16.7952290238 |
| H | -2.7224767231  | -24.3140439050 | 18.5968822692 |
| H | -9.2602622637  | -23.5563347135 | 16.7730280538 |
| H | -10.1073520811 | -23.9426239368 | 15.2866965539 |
| H | -8.5398147615  | -25.4131029666 | 18.0539219919 |
| H | -8.7572684314  | -25.8356233096 | 13.7871353591 |
| H | -7.8685767330  | -27.8072778671 | 18.2460215444 |
| H | -8.1224707620  | -28.2182399643 | 13.9933824259 |
| H | -8.0078262105  | -23.4825584190 | 13.9562918691 |
| H | -9.7921898770  | -31.7182464959 | 21.7364306054 |
| H | -10.4324096661 | -31.3726254978 | 20.1399985679 |
| H | -8.3417437699  | -30.9798950120 | 18.0455677043 |
| H | -5.1983281771  | -30.5086558635 | 20.7683854210 |
| H | -10.7028532110 | -33.8109281768 | 20.6770731033 |
| H | -1.0927001308  | -35.9971655628 | 18.3088947502 |
| H | -1.1490727915  | -37.6107102097 | 17.6232406083 |
| H | -2.6016656112  | -37.9287051035 | 15.7679656794 |
| H | -0.8583445555  | -34.0461666202 | 16.3602047302 |
| H | -3.9423973993  | -37.0223220113 | 13.8736681314 |
| H | -2.1779153173  | -33.1647607053 | 14.4677864421 |
| H | -4.0586772347  | -33.6008471541 | 13.1610590362 |
| H | 1.0109473105   | -35.5038175471 | 16.9900883508 |
| H | -5.5284276868  | -28.4099664959 | 14.0203097364 |
| H | -5.5819606229  | -28.3240036375 | 12.1592289122 |
| H | -7.0062521745  | -29.7884683080 | 15.6034831798 |

|    |               |                |               |
|----|---------------|----------------|---------------|
| H  | -5.1565668678 | -30.7569121871 | 12.0475239841 |
| H  | -4.4282596280 | -35.6948679168 | 16.5001190830 |
| H  | -7.2537767361 | -31.2785987917 | 22.0952252314 |
| H  | -0.5325241490 | -30.1363532198 | 19.6808976789 |
| H  | -8.5056862914 | -22.0732068798 | 14.9072500405 |
| H  | -7.1553626610 | -23.0899448763 | 15.4521298493 |
| H  | -4.0414875353 | -24.6074822048 | 19.7354618848 |
| H  | -2.3861507757 | -25.0680724261 | 20.1624325915 |
| H  | 0.9494206512  | -37.1281866661 | 16.3016642943 |
| H  | 1.2202631004  | -36.9135708184 | 18.0429663807 |
| H  | -5.8956247468 | -37.6285033033 | 18.1481753857 |
| H  | -6.8563156826 | -36.8714125240 | 19.4244285776 |
| H  | -9.6069435213 | -33.5984303158 | 19.2962284845 |
| H  | -8.9485992112 | -33.9699094377 | 20.8937630203 |
| S  | -1.4642978730 | -30.1355438551 | 13.7384811867 |
| C  | -2.0140992527 | -30.2864368802 | 15.4704567650 |
| C  | -1.7236373838 | -28.3388725307 | 13.5215075578 |
| H  | -1.0386664104 | -27.7616567104 | 14.1517127429 |
| H  | -1.5226066239 | -28.1064445481 | 12.4719670911 |
| H  | -2.7536819919 | -28.0759474080 | 13.7724102292 |
| H  | -2.9577426193 | -29.7544422155 | 15.6071401801 |
| H  | -2.1629170470 | -31.3449247207 | 15.6851222595 |
| H  | -1.2683770694 | -29.8819963505 | 16.1640622052 |
| H  | -0.0148134882 | -32.3405094251 | 21.4954146188 |
| H  | -1.0442883766 | -33.7467536688 | 21.1920085920 |
| Zn | -5.1561255624 | -30.6378566112 | 17.3569213261 |

### React<sub>Cu(II),II</sub>

|   |               |                |               |
|---|---------------|----------------|---------------|
| C | -5.8569950000 | -37.2389910000 | 19.1709910000 |
| C | -6.4848756052 | -37.5340268738 | 17.7974643509 |
| C | -7.4006097284 | -36.4390400414 | 17.3304159688 |
| N | -7.2872268572 | -35.8539810749 | 16.0845647393 |
| C | -8.4452319838 | -35.7727376944 | 17.9309523751 |
| C | -8.2175157318 | -34.8709352472 | 15.9928390700 |
| N | -8.9491190983 | -34.7920694553 | 17.0939336535 |
| C | -0.1150060000 | -33.2509900000 | 20.8939940000 |
| C | -1.6554866200 | -33.2727860225 | 20.8252750086 |
| C | -2.2408512866 | -32.1282417145 | 20.0510176210 |
| N | -1.7126528157 | -30.8448433204 | 20.1202917167 |
| C | -3.3165671075 | -32.0151924052 | 19.2008373351 |
| C | -2.4496843088 | -30.0259438506 | 19.3311022315 |
| N | -3.4288498678 | -30.7073347487 | 18.7665795196 |
| C | -3.1080190000 | -25.0239970000 | 19.3379980000 |
| C | -2.9422066850 | -26.3580447669 | 18.6096755457 |

|   |               |                |               |
|---|---------------|----------------|---------------|
| C | -3.1388018635 | -26.2401605949 | 17.0941586696 |
| C | -2.8574744436 | -27.5390429371 | 16.3445637904 |
| O | -2.3360043865 | -27.5004187088 | 15.2165839970 |
| O | -3.1488199227 | -28.6425696316 | 16.9627400368 |
| C | -8.1437350000 | -23.1303020000 | 14.9325590000 |
| C | -7.0295149205 | -23.5519802899 | 15.9120279119 |
| C | -6.7507854347 | -25.0437370188 | 15.9380639784 |
| C | -7.0166479486 | -25.8300960193 | 17.0694906263 |
| C | -6.1875857212 | -25.6907943637 | 14.8254604416 |
| C | -6.7302959925 | -27.1946519041 | 17.0998305869 |
| C | -5.8843960041 | -27.0481994311 | 14.8434282256 |
| C | -6.1458726580 | -27.8395011891 | 15.9864862595 |
| O | -5.8496936258 | -29.1358193099 | 15.9895618615 |
| C | -9.7309990000 | -33.4130130000 | 20.3670160000 |
| C | -8.1963135289 | -33.2426340718 | 20.4451770353 |
| C | -7.6056115687 | -32.2787670116 | 19.4538722268 |
| N | -7.9809965155 | -32.2707965039 | 18.1214950868 |
| C | -6.6068960901 | -31.3364476820 | 19.5459922137 |
| C | -7.2214596804 | -31.3682791910 | 17.4653630490 |
| N | -6.3754012887 | -30.7769856757 | 18.2986770812 |
| C | 0.6729850000  | -36.5289920000 | 17.1749980000 |
| C | -0.6200204021 | -36.6400690586 | 18.0026882018 |
| C | -1.8380908771 | -36.3237460494 | 17.1642344791 |
| C | -2.4883781981 | -35.0880644706 | 17.2488795796 |
| C | -2.2950756753 | -37.2356681062 | 16.2023087595 |
| C | -3.5495636691 | -34.7537117943 | 16.4055226121 |
| C | -3.3395059317 | -36.9183314354 | 15.3379286370 |
| C | -3.9627955171 | -35.6667822531 | 15.4246938316 |
| O | -4.9673481830 | -35.3969127527 | 14.5430569587 |
| C | -3.7332594122 | -30.0622576291 | 13.9160274247 |
| C | -4.8999500417 | -31.0204465851 | 13.7582988845 |
| C | -5.0950017451 | -31.9854095097 | 14.9357109287 |
| O | -4.4763092583 | -31.7410089440 | 16.0107141763 |
| O | -5.8678243887 | -32.9646145655 | 14.7326903814 |
| H | -5.6842216161 | -37.6651318217 | 17.0602403265 |
| H | -7.0274356952 | -38.4883381603 | 17.8401179045 |
| H | -8.8651574383 | -35.9433567541 | 18.9120898938 |
| H | -8.2788403995 | -34.2171871943 | 15.1345443202 |
| H | -5.2121345940 | -38.0644438016 | 19.4903166649 |
| H | -1.9954237405 | -34.2042849532 | 20.3604479538 |
| H | -2.0605832465 | -33.2772509272 | 21.8471455195 |
| H | -4.0092185417 | -32.7703110673 | 18.8623768527 |
| H | -2.2478949814 | -28.9830138580 | 19.1537003064 |
| H | 0.2551830142  | -34.1335841519 | 21.4236867932 |

|   |                |                |               |
|---|----------------|----------------|---------------|
| H | -3.6603473223  | -27.0898563146 | 18.9978035658 |
| H | -1.9376586465  | -26.7578826648 | 18.8147392245 |
| H | -4.1756521137  | -25.9548583691 | 16.8785109433 |
| H | -2.4976867721  | -25.4602140997 | 16.6699101858 |
| H | -2.3782917642  | -24.2855025777 | 18.9854253482 |
| H | -6.1069931948  | -23.0177235844 | 15.6441353130 |
| H | -7.2923000009  | -23.2157340579 | 16.9227015928 |
| H | -7.4532407137  | -25.3615730198 | 17.9502431842 |
| H | -5.9574710008  | -25.1099930585 | 13.9338158444 |
| H | -6.9336115316  | -27.7940197384 | 17.9839533851 |
| H | -5.4194254081  | -27.5238235371 | 13.9845015433 |
| H | -9.0945310837  | -23.6051471435 | 15.1971768508 |
| H | -7.7287485457  | -34.2257785698 | 20.2936918586 |
| H | -7.9065231465  | -32.9144458180 | 21.4496409293 |
| H | -6.0403848356  | -31.0303677682 | 20.4127503053 |
| H | -7.2734602545  | -31.1715013706 | 16.4076744340 |
| H | -10.0688039012 | -34.1309139018 | 21.1210375800 |
| H | -0.5676649064  | -35.9556812777 | 18.8597522777 |
| H | -0.6978078051  | -37.6531959572 | 18.4183252712 |
| H | -1.8117774937  | -38.2071359879 | 16.1165732977 |
| H | -2.1588372738  | -34.3567050552 | 17.9846850774 |
| H | -3.6768080861  | -37.6181243510 | 14.5788580061 |
| H | -4.0419860833  | -33.7896829203 | 16.4913377891 |
| H | -5.2779918981  | -34.4460878744 | 14.6387950925 |
| H | 0.7879317978   | -35.5157029732 | 16.7740604635 |
| H | -3.8096075377  | -29.4542632632 | 14.8132888507 |
| H | -3.6204251296  | -29.4057424146 | 13.0481281442 |
| H | -5.8022160232  | -30.4001457148 | 13.7119141570 |
| H | -4.8470267013  | -31.5999147052 | 12.8306012646 |
| H | -6.5290541372  | -35.9891706948 | 15.4145079738 |
| H | -8.5872415116  | -32.9800726870 | 17.6891060475 |
| H | -0.9016307361  | -30.5683266653 | 20.6519953060 |
| H | -8.2869153655  | -22.0440768292 | 14.9435272137 |
| H | -7.8988140646  | -23.4298376476 | 13.9080033277 |
| H | -4.1077094636  | -24.6089099905 | 19.1629926746 |
| H | -2.9760588316  | -25.1346910356 | 20.4204631593 |
| H | 0.6486916431   | -37.2180842696 | 16.3244022502 |
| H | 1.5592995432   | -36.7623996185 | 17.7768409449 |
| H | -6.6279662769  | -37.0960134255 | 19.9349909866 |
| H | -5.2507895676  | -36.3285610931 | 19.1230763906 |
| H | -10.2409118608 | -32.4609994066 | 20.5470395153 |
| H | -10.0389022413 | -33.7825223743 | 19.3843644629 |
| S | -2.1003427550  | -30.9466889666 | 13.9951975845 |
| C | -1.6548261317  | -31.0738500026 | 15.7598005032 |

|    |               |                |               |
|----|---------------|----------------|---------------|
| C  | -0.9819535447 | -29.6008542740 | 13.4859226805 |
| H  | 0.0417631509  | -29.9482419761 | 13.6411188070 |
| H  | -1.1522854861 | -29.4177964026 | 12.4229315063 |
| H  | -1.2298364334 | -28.7212837751 | 14.0924965301 |
| H  | -1.9741428332 | -30.1573681943 | 16.2670704696 |
| H  | -2.1875775919 | -31.9335633645 | 16.1604604176 |
| H  | -0.5719982452 | -31.2230075778 | 15.7823240058 |
| H  | 0.3245064010  | -33.2470611516 | 19.8911543687 |
| H  | 0.2596644816  | -32.3738594341 | 21.4345559006 |
| Cu | -4.7199245740 | -29.8421088116 | 17.3875227080 |

### TS<sub>Cu(II),II</sub>

|   |                |                 |                |
|---|----------------|-----------------|----------------|
| C | -5.8569950000# | -37.2389910000# | 19.1709910000# |
| C | -5.7636830000# | -36.8493940000# | 17.6949590000# |
| C | -7.0470560000# | -36.2912390000# | 17.1621080000# |
| N | -7.1595810000# | -35.7514740000# | 15.8962860000# |
| C | -8.3003690000# | -36.1474420000# | 17.7173340000# |
| C | -8.4355120000# | -35.3041250000# | 15.7483410000# |
| N | -9.1626030000  | -35.5154250000  | 16.8369690000  |
| C | -0.1150060000  | -33.2509900000  | 20.8939940000  |
| C | -1.5974750000  | -33.5063610000  | 20.5590980000  |
| C | -2.2785230000  | -32.3681290000  | 19.8576150000  |
| N | -2.0457240000  | -31.0389700000  | 20.1867350000  |
| C | -3.2307400000  | -32.3191460000  | 18.8667650000  |
| C | -2.8258640000  | -30.2530070000  | 19.4051270000  |
| N | -3.5556690000  | -31.0028190000  | 18.6001970000  |
| C | -3.1080190000  | -25.0239970000  | 19.3379980000  |
| C | -2.9804920000  | -26.4663150000  | 18.8612200000  |
| C | -2.6594940000  | -26.5875390000  | 17.3647010000  |
| C | -2.8260280000  | -28.0178360000  | 16.8481310000  |
| O | -1.9969770000  | -28.5358000000  | 16.0823330000  |
| O | -3.9085020000  | -28.5646700000  | 17.2816130000  |
| C | -8.1437350000  | -23.1303020000  | 14.9325590000  |
| C | -6.8036520000  | -23.6395670000  | 15.4978010000  |
| C | -6.6995500000  | -25.1495560000  | 15.6075770000  |
| C | -6.5802690000  | -25.7948680000  | 16.8478020000  |
| C | -6.7018370000  | -25.9590570000  | 14.4633820000  |
| C | -6.4399900000  | -27.1784410000  | 16.9466600000  |
| C | -6.5672270000  | -27.3452750000  | 14.5438590000  |
| C | -6.4148160000  | -27.9791450000  | 15.7931100000  |
| O | -6.2545950000  | -29.3248260000  | 15.8759310000  |
| C | -9.7309990000  | -33.4130130000  | 20.3670160000  |
| C | -8.1993000000  | -33.5305850000  | 20.3228580000  |
| C | -7.5708920000  | -32.7764700000  | 19.1954210000  |

|   |               |                |               |
|---|---------------|----------------|---------------|
| N | -7.9108420000 | -32.9794740000 | 17.8694690000 |
| C | -6.5819650000 | -31.8263440000 | 19.1656610000 |
| C | -7.1347100000 | -32.1905410000 | 17.0955690000 |
| N | -6.3195820000 | -31.4745300000 | 17.8559660000 |
| C | 0.6729850000  | -36.5289920000 | 17.1749980000 |
| C | -0.7138590000 | -36.8611140000 | 17.7492170000 |
| C | -1.8331670000 | -36.4143630000 | 16.8357470000 |
| C | -2.2305460000 | -35.0709980000 | 16.7941160000 |
| C | -2.4670000000 | -37.3062460000 | 15.9610670000 |
| C | -3.2369500000 | -34.6230020000 | 15.9375430000 |
| C | -3.4660170000 | -36.8802860000 | 15.0871150000 |
| C | -3.8662290000 | -35.5377210000 | 15.0770810000 |
| O | -4.8990210000 | -35.1899720000 | 14.2621800000 |
| C | -3.9983250000 | -29.5083170000 | 13.7873780000 |
| C | -5.1147610000 | -30.3882690000 | 13.7644240000 |
| C | -4.9679000000 | -31.6968950000 | 14.4972920000 |
| O | -4.3286730000 | -31.6758860000 | 15.5984110000 |
| O | -5.5114510000 | -32.7192340000 | 13.9889110000 |
| H | -4.9620410000 | -36.1141620000 | 17.5581210000 |
| H | -5.4587970000 | -37.7185180000 | 17.0986190000 |
| H | -8.6290940000 | -36.4536660000 | 18.7002160000 |
| H | -8.7785790000 | -34.8259200000 | 14.8409800000 |
| H | -4.9037510000 | -37.6456290000 | 19.5210800000 |
| H | -1.6895680000 | -34.3914380000 | 19.9214610000 |
| H | -2.1381240000 | -33.7430780000 | 21.4861050000 |
| H | -3.6998680000 | -33.1263840000 | 18.3274720000 |
| H | -2.8389220000 | -29.1765510000 | 19.4293950000 |
| H | 0.3264620000  | -34.1360110000 | 21.3601090000 |
| H | -3.9202580000 | -26.9945410000 | 19.0474190000 |
| H | -2.1989510000 | -26.9780910000 | 19.4427540000 |
| H | -3.3732480000 | -25.9721940000 | 16.8001870000 |
| H | -1.6507970000 | -26.2329560000 | 17.1335060000 |
| H | -2.1868380000 | -24.4557600000 | 19.1633290000 |
| H | -5.9907270000 | -23.2681160000 | 14.8586990000 |
| H | -6.6373950000 | -23.1949100000 | 16.4864690000 |
| H | -6.5843670000 | -25.2002390000 | 17.7592970000 |
| H | -6.8103100000 | -25.4991360000 | 13.4832130000 |
| H | -6.3107400000 | -27.6572470000 | 17.9108860000 |
| H | -6.5891490000 | -27.9453190000 | 13.6402370000 |
| H | -8.9780520000 | -23.4389050000 | 15.5709140000 |
| H | -7.9215010000 | -34.5899310000 | 20.2427760000 |
| H | -7.7638530000 | -33.1615150000 | 21.2576650000 |
| H | -6.0343400000 | -31.3865230000 | 19.9845200000 |
| H | -7.1539410000 | -32.1846430000 | 16.0170800000 |

|    |                |                |               |
|----|----------------|----------------|---------------|
| H  | -10.1358920000 | -33.9619330000 | 21.2227840000 |
| H  | -0.8191990000  | -36.3805840000 | 18.7317720000 |
| H  | -0.7874470000  | -37.9408210000 | 17.9266440000 |
| H  | -2.1758140000  | -38.3544620000 | 15.9644190000 |
| H  | -1.7471960000  | -34.3505760000 | 17.4514860000 |
| H  | -3.9600390000  | -37.5756100000 | 14.4153940000 |
| H  | -3.5569930000  | -33.5842130000 | 15.9427260000 |
| H  | -5.0595920000  | -34.1864330000 | 14.2317030000 |
| H  | 0.7766690000   | -35.4500920000 | 17.0162170000 |
| H  | -3.4853290000  | -29.3605070000 | 14.7332610000 |
| H  | -4.0372270000  | -28.6225550000 | 13.1561680000 |
| H  | -5.8046010000  | -29.7650210000 | 14.7544930000 |
| H  | -5.6786020000  | -30.4629840000 | 12.8353570000 |
| H  | -6.4005740000  | -35.6444710000 | 15.2123110000 |
| H  | -8.5681620000  | -33.6792280000 | 17.5221110000 |
| H  | -1.3782570000  | -30.7074640000 | 20.8658880000 |
| H  | -8.1500720000  | -22.0374080000 | 14.8618840000 |
| H  | -8.3274050000  | -23.5348310000 | 13.9317950000 |
| H  | -3.9165450000  | -24.5135760000 | 18.8019030000 |
| H  | -3.3323940000  | -24.9724040000 | 20.4089680000 |
| H  | 0.8171410000   | -37.0187840000 | 16.2065530000 |
| H  | 1.4753690000   | -36.8542300000 | 17.8468400000 |
| H  | -6.6293660000  | -37.9972260000 | 19.3373380000 |
| H  | -6.1025290000  | -36.3695940000 | 19.7911890000 |
| H  | -10.0411280000 | -32.3667980000 | 20.4500510000 |
| H  | -10.1823180000 | -33.8301370000 | 19.4606650000 |
| S  | -2.0816530000  | -30.3440130000 | 12.8772640000 |
| C  | -1.4991920000  | -31.2999370000 | 14.3204120000 |
| C  | -1.0602870000  | -28.8431060000 | 13.0594290000 |
| H  | -0.0082970000  | -29.1017510000 | 12.9134420000 |
| H  | -1.3693310000  | -28.1413530000 | 12.2810280000 |
| H  | -1.2203190000  | -28.4185920000 | 14.0537850000 |
| H  | -1.6108010000  | -30.6892260000 | 15.2184490000 |
| H  | -2.1268890000  | -32.1869970000 | 14.4008150000 |
| H  | -0.4577120000  | -31.5849330000 | 14.1506210000 |
| H  | 0.4587080000   | -33.0166590000 | 19.9921100000 |
| H  | 0.0073140000   | -32.4221600000 | 21.6009490000 |
| Cu | -4.8790810000  | -30.2261420000 | 17.1884650000 |

### **Prod<sub>Cu(II),II</sub>**

|   |               |                |               |
|---|---------------|----------------|---------------|
| C | -5.8569950000 | -37.2389910000 | 19.1709910000 |
| C | -5.7576121669 | -37.0720983786 | 17.6521877888 |
| C | -7.0124974882 | -36.5108969223 | 17.0563328527 |
| N | -7.0732615602 | -36.0025450883 | 15.7734506973 |

|   |               |                |               |
|---|---------------|----------------|---------------|
| C | -8.2794552042 | -36.3267631068 | 17.5655868078 |
| C | -8.3328281530 | -35.5300423594 | 15.5736643271 |
| N | -9.0983659228 | -35.6986223336 | 16.6424080455 |
| C | -0.1150060000 | -33.2509900000 | 20.8939940000 |
| C | -1.6320212786 | -33.4381076026 | 20.6912835766 |
| C | -2.2765658986 | -32.3640610281 | 19.8662918367 |
| N | -1.9441897172 | -31.0215546210 | 19.9933105448 |
| C | -3.2641195036 | -32.3881895581 | 18.9107871135 |
| C | -2.7015981268 | -30.2969927100 | 19.1363307043 |
| N | -3.5121391668 | -31.1011542878 | 18.4711269242 |
| C | -3.1080190000 | -25.0239970000 | 19.3379980000 |
| C | -3.1168114588 | -26.4219705188 | 18.7076178211 |
| C | -3.4180797231 | -26.4137371497 | 17.1997656152 |
| C | -3.4554714597 | -27.8130841430 | 16.5783514162 |
| O | -2.9003224816 | -28.0630485846 | 15.5056474697 |
| O | -4.1280843708 | -28.6673896967 | 17.2966594340 |
| C | -8.1437350000 | -23.1303020000 | 14.9325590000 |
| C | -7.1964280369 | -23.7060462925 | 16.0022693809 |
| C | -6.9700947402 | -25.2000694978 | 15.8698985655 |
| C | -7.4107467258 | -26.1058699015 | 16.8451381155 |
| C | -6.2953144644 | -25.7189873635 | 14.7561281111 |
| C | -7.1849774628 | -27.4778130969 | 16.7253494744 |
| C | -6.0597669538 | -27.0843710147 | 14.6189303682 |
| C | -6.5105627173 | -27.9615215479 | 15.6076736984 |
| O | -6.2822681330 | -29.3214066284 | 15.5228742267 |
| C | -9.7309990000 | -33.4130130000 | 20.3670160000 |
| C | -8.2063175688 | -33.5658761721 | 20.1827588721 |
| C | -7.5947654827 | -32.8532472803 | 19.0103886615 |
| N | -7.8801864801 | -33.1647163666 | 17.6907013868 |
| C | -6.5913853529 | -31.9174983976 | 18.9385973771 |
| C | -7.0561748832 | -32.4609938548 | 16.8844130848 |
| N | -6.2615687506 | -31.6863560458 | 17.6136420609 |
| C | 0.6729850000  | -36.5289920000 | 17.1749980000 |
| C | -0.7007778296 | -36.6222133801 | 17.8590482740 |
| C | -1.8204803657 | -36.2777565149 | 16.9032455917 |
| C | -2.2768187438 | -34.9609806992 | 16.7700369551 |
| C | -2.3733374734 | -37.2485798005 | 16.0580149318 |
| C | -3.2703298774 | -34.6114165292 | 15.8532000616 |
| C | -3.3535306036 | -36.9214527679 | 15.1248951084 |
| C | -3.8158162294 | -35.6038250587 | 15.0257346380 |
| O | -4.8307492702 | -35.3616916797 | 14.1467004610 |
| C | -4.0777986710 | -29.7611012453 | 13.0608051012 |
| C | -4.8734830598 | -30.8388442433 | 13.0050496168 |
| C | -4.9620533678 | -31.8364647343 | 14.1245719863 |



|   |                |                |               |
|---|----------------|----------------|---------------|
| O | -4.3970220891  | -31.5570503862 | 15.2319748959 |
| O | -5.6039692577  | -32.8989443257 | 13.8918612554 |
| H | -4.9165022785  | -36.4135421922 | 17.4102814417 |
| H | -5.5157173736  | -38.0367758241 | 17.1856653104 |
| H | -8.6467274920  | -36.5986316440 | 18.5454423856 |
| H | -8.6346505173  | -35.0649709797 | 14.6449075442 |
| H | -4.9239950440  | -37.6426904584 | 19.5755330327 |
| H | -1.8278893335  | -34.3949944149 | 20.1969541254 |
| H | -2.1229420427  | -33.4949490385 | 21.6732053064 |
| H | -3.8005110409  | -33.2297227134 | 18.5016008525 |
| H | -2.6543374812  | -29.2288401049 | 19.0073107054 |
| H | 0.2973738101   | -34.0882888041 | 21.4640158398 |
| H | -3.8657373531  | -27.0488967205 | 19.2043707942 |
| H | -2.1388865360  | -26.8982672285 | 18.8757491068 |
| H | -4.4054838208  | -25.9656709833 | 17.0259198435 |
| H | -2.6820307907  | -25.8199955901 | 16.6490932849 |
| H | -2.3491476624  | -24.3826623326 | 18.8748620420 |
| H | -6.2295599844  | -23.1885929474 | 15.9367414307 |
| H | -7.5949772970  | -23.4848101066 | 16.9996142523 |
| H | -7.9342013726  | -25.7318398204 | 17.7220842003 |
| H | -5.9282742563  | -25.0425599329 | 13.9878986620 |
| H | -7.5108526611  | -28.1770685299 | 17.4891212438 |
| H | -5.5056971323  | -27.4680487025 | 13.7681264972 |
| H | -9.1320008629  | -23.5977560614 | 14.9955828606 |
| H | -7.9673811596  | -34.6344417965 | 20.0901311577 |
| H | -7.6898697746  | -33.2116389362 | 21.0816350375 |
| H | -6.0659174052  | -31.4202349558 | 19.7393812878 |
| H | -7.0126702200  | -32.5617964776 | 15.8093818464 |
| H | -10.0626644356 | -33.9690547339 | 21.2492265725 |
| H | -0.7227599059  | -35.9425925046 | 18.7218180234 |
| H | -0.8446884852  | -37.6349975991 | 18.2569203696 |
| H | -2.0305975513  | -38.2788545000 | 16.1309680577 |
| H | -1.8444668222  | -34.1851974979 | 17.3978988427 |
| H | -3.7855926630  | -37.6744192350 | 14.4724163985 |
| H | -3.6239237106  | -33.5866122070 | 15.7732334013 |
| H | -5.0524890616  | -34.3848667845 | 14.0909559039 |
| H | 0.8458948905   | -35.5171820368 | 16.7926238027 |
| H | -3.4788921272  | -29.5410760713 | 13.9401912721 |
| H | -4.0055472910  | -29.0757799085 | 12.2190659504 |
| H | -5.8454931719  | -29.5200713326 | 14.6741421551 |
| H | -5.4636203128  | -31.0781050191 | 12.1237454084 |
| H | -6.2956509715  | -35.9132020103 | 15.1092785470 |
| H | -8.5324779916  | -33.8834024026 | 17.3692013775 |
| H | -1.2310249987  | -30.6453625930 | 20.5994963147 |

|    |                |                |               |
|----|----------------|----------------|---------------|
| H  | -8.2668529602  | -22.0494802846 | 15.0593070403 |
| H  | -7.7558120163  | -23.3102482295 | 13.9246113868 |
| H  | -4.0795865011  | -24.5326357706 | 19.2087931128 |
| H  | -2.8964370848  | -25.0711579756 | 20.4119482190 |
| H  | 0.7267379582   | -37.2153220846 | 16.3234258139 |
| H  | 1.4860324126   | -36.7786891369 | 17.8669882211 |
| H  | -6.6671780275  | -37.9213746017 | 19.4491905023 |
| H  | -6.0492225856  | -36.2751288574 | 19.6546217333 |
| H  | -10.0083457718 | -32.3619400754 | 20.4955086135 |
| H  | -10.2735443222 | -33.8033692472 | 19.4992083763 |
| S  | -0.6253006451  | -31.2017034610 | 14.3542428628 |
| C  | -1.3320138326  | -31.0712950812 | 16.0289491215 |
| C  | -0.0975675046  | -29.4632321471 | 14.1450318171 |
| H  | 0.7111959498   | -29.2092975094 | 14.8391983143 |
| H  | 0.2725089791   | -29.3557509564 | 13.1215440124 |
| H  | -0.9418469713  | -28.7884237185 | 14.3058136654 |
| H  | -2.0627305395  | -30.2626591879 | 16.0563703394 |
| H  | -1.8434232268  | -32.0100214589 | 16.2407933294 |
| H  | -0.5523093566  | -30.9007386478 | 16.7810583090 |
| H  | 0.4073858995   | -33.2014022706 | 19.9333873889 |
| H  | 0.1138736666   | -32.3371425513 | 21.4547260162 |
| Cu | -4.7644628211  | -30.4464186766 | 16.9543473775 |

### React<sub>M-Fe(III),VI</sub>

|   |               |                |               |
|---|---------------|----------------|---------------|
| C | -5.8569950000 | -37.2389910000 | 19.1709910000 |
| C | -5.2078650532 | -35.8632805845 | 19.4255907800 |
| C | -5.5005051916 | -34.7992538993 | 18.4072247958 |
| N | -5.2727302359 | -34.9572532073 | 17.0505585763 |
| C | -5.8800696089 | -33.4860991282 | 18.5398629362 |
| C | -5.4938883707 | -33.7702768948 | 16.4340464399 |
| N | -5.8575569027 | -32.8426879522 | 17.3098790993 |
| C | -0.1150060000 | -33.2509900000 | 20.8939940000 |
| C | -0.6101520729 | -33.2771361094 | 19.4290217537 |
| C | -1.7316021150 | -32.3281322924 | 19.1024612882 |
| N | -1.7971905042 | -31.0388111769 | 19.6114828856 |
| C | -2.8141747216 | -32.4183488831 | 18.2565125078 |
| C | -2.8727944427 | -30.4116549794 | 19.0721574190 |
| N | -3.5131588242 | -31.2213441488 | 18.2434814061 |
| C | -3.1080190000 | -25.0239970000 | 19.3379980000 |
| C | -3.3063532069 | -26.4665327506 | 18.8724525462 |
| C | -3.5801580436 | -26.5419144511 | 17.3659357535 |
| C | -3.7232844360 | -27.9626439315 | 16.8403759111 |
| O | -3.0943372949 | -28.3089490863 | 15.8200127423 |
| O | -4.5300139741 | -28.7176112493 | 17.5034815007 |

|   |               |                |               |
|---|---------------|----------------|---------------|
| C | -8.1409660000 | -23.1040170000 | 14.9750030000 |
| C | -8.7592906234 | -24.1717929105 | 15.9171055107 |
| C | -8.1478251184 | -25.5683890523 | 15.9222332128 |
| C | -7.5692813589 | -26.1086128484 | 17.0888142521 |
| C | -8.2428505621 | -26.4270816114 | 14.8046520360 |
| C | -7.1112870479 | -27.4201671041 | 17.1571110112 |
| C | -7.7947705618 | -27.7416303330 | 14.8495479704 |
| C | -7.1951821807 | -28.2813194550 | 16.0267121897 |
| O | -6.7425442771 | -29.5196905885 | 16.0364788802 |
| C | -9.7309990000 | -33.4130130000 | 20.3670160000 |
| C | -9.8016481165 | -31.8788044984 | 20.1896254626 |
| C | -8.4878023037 | -31.2578725002 | 19.8210799319 |
| N | -7.4733363787 | -31.0046898109 | 20.7382572980 |
| C | -7.9518997188 | -30.8986754650 | 18.6112510905 |
| C | -6.3906978733 | -30.5258402098 | 20.0707503922 |
| N | -6.6510712390 | -30.4599606556 | 18.7771858716 |
| C | 0.6729850000  | -36.5289920000 | 17.1749980000 |
| C | -0.7936652658 | -36.8363736289 | 17.5213468534 |
| C | -1.7602098733 | -36.3560128060 | 16.4577508443 |
| C | -1.7519720498 | -35.0204967223 | 16.0290443248 |
| C | -2.6655540400 | -37.2267263796 | 15.8374877286 |
| C | -2.6046909044 | -34.5632275844 | 15.0296104448 |
| C | -3.5328991560 | -36.7898248012 | 14.8320233117 |
| C | -3.5069452277 | -35.4505195391 | 14.4182659957 |
| O | -4.3955685007 | -35.0545160637 | 13.4759981266 |
| C | -4.8796470954 | -28.9555070487 | 13.4223226568 |
| C | -5.5610569420 | -30.3137910611 | 13.3108424164 |
| C | -4.7808122655 | -31.4113505309 | 14.0387409966 |
| O | -4.5560560295 | -31.2603610838 | 15.2915753816 |
| O | -4.3565410207 | -32.3647512679 | 13.3555855725 |
| H | -5.5236291358 | -35.4788545309 | 20.4019450376 |
| H | -4.1173044972 | -35.9931599294 | 19.4878437844 |
| H | -6.1286591686 | -32.9643937116 | 19.4486389257 |
| H | -5.3539310911 | -33.6245529110 | 15.3779109742 |
| H | -5.5927277839 | -37.9376851778 | 19.9698964751 |
| H | 0.2416300564  | -33.0693974763 | 18.7654428818 |
| H | -0.9484520055 | -34.2852065826 | 19.1710528782 |
| H | -3.1190829864 | -33.2522481767 | 17.6452227672 |
| H | -3.1517477816 | -29.3910509004 | 19.2777616542 |
| H | 0.6705140506  | -33.9976701781 | 21.0364541449 |
| H | -4.1411075926 | -26.9350224606 | 19.4073773651 |
| H | -2.4072072341 | -27.0542999845 | 19.1068614266 |
| H | -4.5213525531 | -26.0203962652 | 17.1428704297 |
| H | -2.7816618909 | -26.0463309484 | 16.8050188866 |

|   |                |                |               |
|---|----------------|----------------|---------------|
| H | -2.2586389511  | -24.5570526087 | 18.8269105851 |
| H | -8.7404192320  | -23.7843845195 | 16.9421715831 |
| H | -9.8214623226  | -24.2785187616 | 15.6565254511 |
| H | -7.4978291305  | -25.4844723363 | 17.9770561513 |
| H | -8.7097130971  | -26.0596463536 | 13.8933664726 |
| H | -6.6701025903  | -27.8158828912 | 18.0624033568 |
| H | -7.9157589270  | -28.3903586562 | 13.9865823989 |
| H | -8.1768048372  | -23.4266092000 | 13.9291310507 |
| H | -10.1889980299 | -31.4146382963 | 21.1060102046 |
| H | -10.5178958037 | -31.6354787370 | 19.3982062366 |
| H | -8.3897945591  | -30.9507734766 | 17.6274158706 |
| H | -5.4528334929  | -30.2667625925 | 20.5374054097 |
| H | -10.7198987218 | -33.8168258167 | 20.6018198505 |
| H | -1.0403145387  | -36.3794364280 | 18.4915527535 |
| H | -0.9167353411  | -37.9163665197 | 17.6627518510 |
| H | -2.6896961998  | -38.2726512711 | 16.1357629716 |
| H | -1.0653781926  | -34.3126006151 | 16.4870730490 |
| H | -4.2245258518  | -37.4723825708 | 14.3473165737 |
| H | -2.6068665627  | -33.5192930860 | 14.7340966002 |
| H | -4.3334734729  | -34.0822695415 | 13.3500459898 |
| H | 0.8503509131   | -35.4517264356 | 17.0907180544 |
| H | -4.6242643312  | -28.7155626815 | 14.4546759488 |
| H | -5.4813738106  | -28.1581721989 | 12.9774899787 |
| H | -6.5228696609  | -30.2060316537 | 13.8195495440 |
| H | -5.7263643717  | -30.6126830248 | 12.2730697420 |
| H | -4.9003750395  | -35.7790737665 | 16.5853488006 |
| H | -7.5433003690  | -31.1245917668 | 21.7387250738 |
| H | -1.1466158290  | -30.6300696450 | 20.2657305871 |
| H | -8.6981347285  | -22.1672937814 | 15.0615106878 |
| H | -7.0949891463  | -22.9093357178 | 15.2329579325 |
| H | -3.9960215790  | -24.4175053374 | 19.1250495843 |
| H | -2.9186466413  | -24.9695064143 | 20.4152237039 |
| H | 0.9472871502   | -36.9848111942 | 16.2186601061 |
| H | 1.3485634074   | -36.9170255362 | 17.9449361406 |
| H | -5.5128767322  | -37.6716459841 | 18.2248853026 |
| H | -6.9475113084  | -37.1591829084 | 19.1277768061 |
| H | -9.3666848887  | -33.8894448239 | 19.4518636760 |
| H | -9.0508448484  | -33.6878797278 | 21.1808723871 |
| S | -3.2890812168  | -28.8757605564 | 12.4734477481 |
| C | -2.1480642678  | -29.9595072707 | 13.4029772420 |
| C | -2.6912664618  | -27.2283334191 | 12.9760928728 |
| H | -1.7133094876  | -27.0821330933 | 12.5127144804 |
| H | -3.3974244298  | -26.4927533861 | 12.5850802007 |
| H | -2.6387896447  | -27.2050960260 | 14.0688067308 |

|    |               |                |               |
|----|---------------|----------------|---------------|
| H  | -2.3099852365 | -29.7986911233 | 14.4708239606 |
| H  | -2.3618354951 | -30.9855091221 | 13.1026049335 |
| H  | -1.1403110202 | -29.6734093063 | 13.0936853757 |
| H  | 0.3120820911  | -32.2780075954 | 21.1634414496 |
| H  | -0.9291135538 | -33.4711321398 | 21.5917166202 |
| Fe | -5.3344198997 | -30.5217519888 | 17.0128323959 |

### T<sub>SM-Fe(III),VI</sub>

|   |                |                 |                |
|---|----------------|-----------------|----------------|
| C | -5.8569950000# | -37.2389910000# | 19.1709910000# |
| C | -5.2210220000# | -35.8762240000# | 19.5071520000# |
| C | -5.4805850000# | -34.7716530000# | 18.5243540000# |
| N | -5.2957690000# | -34.9114540000# | 17.1578680000# |
| C | -5.7846420000# | -33.4432750000# | 18.6964720000# |
| C | -5.4662200000# | -33.7066710000# | 16.5678020000# |
| N | -5.7571220000  | -32.7814520000  | 17.4751810000  |
| C | -0.1150060000  | -33.2509900000  | 20.8939940000  |
| C | -0.4859270000  | -33.1028040000  | 19.4063680000  |
| C | -1.6508960000  | -32.1974860000  | 19.1433630000  |
| N | -1.7547310000  | -30.9281630000  | 19.6969580000  |
| C | -2.7638940000  | -32.3220400000  | 18.3484850000  |
| C | -2.8783930000  | -30.3388010000  | 19.2268840000  |
| N | -3.5154100000  | -31.1602780000  | 18.4061980000  |
| C | -3.1080190000  | -25.0239970000  | 19.3379980000  |
| C | -3.2579820000  | -26.4863660000  | 18.9215610000  |
| C | -3.5162180000  | -26.6311770000  | 17.4136680000  |
| C | -3.5608690000  | -28.0863250000  | 16.9815690000  |
| O | -2.7305960000  | -28.5508220000  | 16.1906630000  |
| O | -4.5319950000  | -28.7665870000  | 17.5265180000  |
| C | -8.1409660000  | -23.1040170000  | 14.9750030000  |
| C | -8.7380090000  | -24.1345570000  | 15.9631210000  |
| C | -8.1621650000  | -25.5459280000  | 15.9379970000  |
| C | -7.5894810000  | -26.1222640000  | 17.0828980000  |
| C | -8.2718570000  | -26.3709250000  | 14.8060680000  |
| C | -7.1410000000  | -27.4468390000  | 17.1136880000  |
| C | -7.8340790000  | -27.6972600000  | 14.8159300000  |
| C | -7.2505230000  | -28.2500830000  | 15.9714160000  |
| O | -6.7945220000  | -29.5549440000  | 15.9491630000  |
| C | -9.7309990000  | -33.4130130000  | 20.3670160000  |
| C | -9.8829900000  | -31.9137200000  | 20.0234790000  |
| C | -8.5830550000  | -31.2448840000  | 19.6971060000  |
| N | -7.6371670000  | -30.9035280000  | 20.6584170000  |
| C | -7.9922450000  | -30.9234900000  | 18.5029810000  |
| C | -6.5373370000  | -30.4126590000  | 20.0338730000  |
| N | -6.7226650000  | -30.4210530000  | 18.7238830000  |

|   |                |                |               |
|---|----------------|----------------|---------------|
| C | 0.6729850000   | -36.5289920000 | 17.1749980000 |
| C | -0.8017160000  | -36.7064170000 | 17.5753430000 |
| C | -1.7756450000  | -36.2358320000 | 16.5136460000 |
| C | -1.7797120000  | -34.9054890000 | 16.0669850000 |
| C | -2.6877730000  | -37.1175630000 | 15.9176960000 |
| C | -2.6563300000  | -34.4612900000 | 15.0786090000 |
| C | -3.5731870000  | -36.6956450000 | 14.9226840000 |
| C | -3.5670200000  | -35.3587510000 | 14.4934680000 |
| O | -4.4741800000  | -34.9917110000 | 13.5616280000 |
| C | -4.8323130000  | -28.7967060000 | 13.7345060000 |
| C | -5.5986760000  | -30.0432280000 | 13.6591150000 |
| C | -5.0095110000  | -31.2490060000 | 14.2450460000 |
| O | -4.5284840000  | -31.1127950000 | 15.4791190000 |
| O | -4.9976410000  | -32.3492950000 | 13.6672540000 |
| H | -5.5680770000  | -35.5342650000 | 20.4880890000 |
| H | -4.1332620000  | -36.0083460000 | 19.5976340000 |
| H | -5.9822510000  | -32.9212090000 | 19.6184570000 |
| H | -5.3595140000  | -33.5328830000 | 15.5106230000 |
| H | -5.6211300000  | -37.9683550000 | 19.9502450000 |
| H | 0.3891520000   | -32.7400000000 | 18.8498250000 |
| H | -0.7279560000  | -34.0815420000 | 18.9839270000 |
| H | -3.0569660000  | -33.1526920000 | 17.7278620000 |
| H | -3.1880390000  | -29.3356830000 | 19.4689080000 |
| H | 0.7208710000   | -33.9459540000 | 21.0082790000 |
| H | -4.0860630000  | -26.9562110000 | 19.4663900000 |
| H | -2.3437360000  | -27.0367780000 | 19.1852110000 |
| H | -4.4817120000  | -26.1729380000 | 17.1661780000 |
| H | -2.7305950000  | -26.1257400000 | 16.8445780000 |
| H | -2.2684670000  | -24.5511750000 | 18.8174310000 |
| H | -8.6445670000  | -23.7402170000 | 16.9815760000 |
| H | -9.8168710000  | -24.2072390000 | 15.7704080000 |
| H | -7.5011680000  | -25.5249520000 | 17.9877030000 |
| H | -8.7355920000  | -25.9813930000 | 13.9029530000 |
| H | -6.6885170000  | -27.8597160000 | 18.0041250000 |
| H | -7.9618160000  | -28.3177380000 | 13.9342550000 |
| H | -8.2492260000  | -23.4377710000 | 13.9377280000 |
| H | -10.3752570000 | -31.3892060000 | 20.8521790000 |
| H | -10.5404110000 | -31.8007530000 | 19.1561530000 |
| H | -8.3675300000  | -31.0354580000 | 17.4983570000 |
| H | -5.6429060000  | -30.0869490000 | 20.5414740000 |
| H | -10.7090380000 | -33.8609220000 | 20.5617560000 |
| H | -0.9862120000  | -36.1698860000 | 18.5176140000 |
| H | -0.9920920000  | -37.7627670000 | 17.7961250000 |
| H | -2.7028770000  | -38.1593550000 | 16.2291760000 |

|    |               |                |               |
|----|---------------|----------------|---------------|
| H  | -1.0816440000 | -34.1926590000 | 16.4991080000 |
| H  | -4.2688830000 | -37.3862360000 | 14.4562670000 |
| H  | -2.6635360000 | -33.4190120000 | 14.7742520000 |
| H  | -4.5389210000 | -34.0147210000 | 13.5014200000 |
| H  | 0.9115990000  | -35.4763650000 | 16.9899610000 |
| H  | -4.4077110000 | -28.5933100000 | 14.7135500000 |
| H  | -5.3475310000 | -27.9257470000 | 13.3278910000 |
| H  | -6.4513090000 | -29.7807580000 | 14.8597340000 |
| H  | -6.1157560000 | -30.2356380000 | 12.7204120000 |
| H  | -4.9741260000 | -35.7403830000 | 16.6680200000 |
| H  | -7.7647080000 | -30.9747840000 | 21.6577130000 |
| H  | -1.0911740000 | -30.5050620000 | 20.3288560000 |
| H  | -8.6541670000 | -22.1436130000 | 15.0758060000 |
| H  | -7.0744290000 | -22.9467090000 | 15.1664880000 |
| H  | -4.0117900000 | -24.4533940000 | 19.0970700000 |
| H  | -2.9299530000 | -24.9290490000 | 20.4137680000 |
| H  | 0.8934340000  | -37.0828230000 | 16.2576410000 |
| H  | 1.3404500000  | -36.8911620000 | 17.9634930000 |
| H  | -5.4745460000 | -37.6339400000 | 18.2234690000 |
| H  | -6.9450870000 | -37.1599300000 | 19.0893980000 |
| H  | -9.2580550000 | -33.9507810000 | 19.5400390000 |
| H  | -9.1109700000 | -33.5558020000 | 21.2587450000 |
| S  | -3.1756460000 | -28.7884400000 | 12.6300580000 |
| C  | -2.2298620000 | -30.1309980000 | 13.4189120000 |
| C  | -2.3240640000 | -27.3191690000 | 13.2919730000 |
| H  | -1.3517680000 | -27.2334800000 | 12.8023990000 |
| H  | -2.9372590000 | -26.4516970000 | 13.0374440000 |
| H  | -2.2222650000 | -27.4292020000 | 14.3747570000 |
| H  | -2.3114500000 | -30.0357200000 | 14.5034810000 |
| H  | -2.6577650000 | -31.0712870000 | 13.0687070000 |
| H  | -1.1958320000 | -30.0463410000 | 13.0782980000 |
| H  | 0.1960300000  | -32.2970370000 | 21.3346970000 |
| H  | -0.9602960000 | -33.6315790000 | 21.4752460000 |
| Fe | -5.2427980000 | -30.5563890000 | 17.1463680000 |

### **Prod<sub>M-Fe(III),VI</sub>**

|   |               |                |               |
|---|---------------|----------------|---------------|
| C | -5.8569950000 | -37.2389910000 | 19.1709910000 |
| C | -4.7687149547 | -36.1497208994 | 19.2043845021 |
| C | -4.9919320228 | -35.0223895819 | 18.2446222779 |
| N | -4.8852027051 | -35.1669064596 | 16.8680580331 |
| C | -5.2671954271 | -33.6933277265 | 18.4342268136 |
| C | -5.0613001306 | -33.9650395824 | 16.2821426108 |
| N | -5.2921842304 | -33.0404726922 | 17.2097938681 |
| C | -0.1150060000 | -33.2509900000 | 20.8939940000 |

|   |                |                |               |
|---|----------------|----------------|---------------|
| C | -0.2019598978  | -33.0140950802 | 19.3713560717 |
| C | -1.3729521985  | -32.1699450719 | 18.9733221269 |
| N | -1.5826808635  | -30.9003775217 | 19.4996490286 |
| C | -2.4306817529  | -32.3740430308 | 18.1249571957 |
| C | -2.7160084340  | -30.3886142490 | 18.9762335702 |
| N | -3.2593711776  | -31.2604975184 | 18.1378277417 |
| C | -3.1080190000  | -25.0239970000 | 19.3379980000 |
| C | -3.1070271520  | -26.4410084414 | 18.7608392603 |
| C | -4.3342566456  | -26.7260832222 | 17.8711447653 |
| C | -4.1790367529  | -28.0761643251 | 17.1929501580 |
| O | -3.3725882557  | -28.2294024514 | 16.2767036273 |
| O | -4.8961045024  | -29.0534339887 | 17.7083234921 |
| C | -8.1409660000  | -23.1040170000 | 14.9750030000 |
| C | -8.4797609708  | -24.1789021408 | 16.0197471446 |
| C | -7.9101018587  | -25.5718592626 | 15.7843271109 |
| C | -8.4855585821  | -26.6718648486 | 16.4455794715 |
| C | -6.8131065916  | -25.8247630777 | 14.9516723299 |
| C | -7.9951822286  | -27.9666097181 | 16.2945653126 |
| C | -6.2992800914  | -27.1150519937 | 14.7946858262 |
| C | -6.8948321199  | -28.1836370380 | 15.4645490484 |
| O | -6.4277409435  | -29.4790038123 | 15.3185588714 |
| C | -9.7309990000  | -33.4130130000 | 20.3670160000 |
| C | -10.0596845579 | -32.3254380521 | 19.3227555858 |
| C | -8.8407161329  | -31.5701151151 | 18.8945703152 |
| N | -8.3517709439  | -30.4586570316 | 19.5726989734 |
| C | -7.9079873734  | -31.8225774687 | 17.9237808984 |
| C | -7.1819054323  | -30.0785013883 | 19.0125230726 |
| N | -6.8816082798  | -30.8988970390 | 18.0140872737 |
| C | 0.6729850000   | -36.5289920000 | 17.1749980000 |
| C | -0.8402267402  | -36.6479399132 | 17.4214618130 |
| C | -1.6641771062  | -36.2576250087 | 16.2119864208 |
| C | -1.5714945569  | -34.9682837187 | 15.6674050873 |
| C | -2.5180199896  | -37.1683040163 | 15.5747816359 |
| C | -2.3178478023  | -34.5864439299 | 14.5567296686 |
| C | -3.2847685877  | -36.8008429436 | 14.4642888240 |
| C | -3.2023990941  | -35.4970047359 | 13.9551727543 |
| O | -3.9937840995  | -35.1727740878 | 12.9048144674 |
| C | -3.2303077691  | -29.3023918190 | 13.3435072294 |
| C | -3.7247464278  | -30.5053089742 | 13.0119315624 |
| C | -4.2504329845  | -31.4777533796 | 13.9953715382 |
| O | -4.2795622028  | -31.0913445958 | 15.2590528907 |
| O | -4.6441928691  | -32.5925749587 | 13.6323007160 |
| H | -4.7006907428  | -35.7237200249 | 20.2111237586 |
| H | -3.7896530320  | -36.6014472950 | 18.9924814035 |



|   |                |                |               |
|---|----------------|----------------|---------------|
| H | -5.4150627169  | -33.1571863977 | 19.3588056677 |
| H | -5.0003411981  | -33.7701360302 | 15.2217596139 |
| H | -5.6297479323  | -38.0304231203 | 19.8908155484 |
| H | 0.7269483090   | -32.5468183313 | 19.0167451817 |
| H | -0.2819038602  | -33.9702581827 | 18.8453814361 |
| H | -2.6405619722  | -33.2269129365 | 17.5011771546 |
| H | -3.1191539834  | -29.4199066937 | 19.2135469086 |
| H | 0.7409497334   | -33.8883676401 | 21.1316623766 |
| H | -3.0777312325  | -27.1682894253 | 19.5860773055 |
| H | -2.2010347340  | -26.6003854258 | 18.1637906106 |
| H | -5.2588279979  | -26.6929699924 | 18.4551623044 |
| H | -4.4009261925  | -25.9703199825 | 17.0822918968 |
| H | -3.0866907516  | -24.2774423864 | 18.5366158681 |
| H | -8.1444505697  | -23.8324459516 | 17.0083265740 |
| H | -9.5707416808  | -24.2677797957 | 16.0989900299 |
| H | -9.3505117421  | -26.5088406141 | 17.0849934416 |
| H | -6.3422656381  | -25.0107808497 | 14.4096378685 |
| H | -8.4625422518  | -28.8125501840 | 16.7876994914 |
| H | -5.4377977893  | -27.2889152977 | 14.1545757110 |
| H | -8.4461563734  | -23.4186366648 | 13.9718965138 |
| H | -10.8084893375 | -31.6303865056 | 19.7224077687 |
| H | -10.5096466322 | -32.7857535336 | 18.4372641749 |
| H | -7.8876500436  | -32.6103536897 | 17.1888334564 |
| H | -6.5932753380  | -29.2223778070 | 19.2986393685 |
| H | -10.6358099730 | -33.9543127059 | 20.6579920417 |
| H | -1.1217544526  | -36.0178938007 | 18.2791358576 |
| H | -1.0829852535  | -37.6765948991 | 17.7128193868 |
| H | -2.5891575833  | -38.1867994291 | 15.9507865829 |
| H | -0.8946076005  | -34.2428918921 | 16.1134952632 |
| H | -3.9455801339  | -37.5095088594 | 13.9742822841 |
| H | -2.2312594131  | -33.5824444673 | 14.1541367219 |
| H | -4.0820249686  | -34.2037688408 | 12.8418250791 |
| H | 0.9586833505   | -35.5022670310 | 16.9224524795 |
| H | -3.1910424159  | -28.9666192071 | 14.3742477504 |
| H | -2.8441074138  | -28.6355149189 | 12.5787307364 |
| H | -5.7322001163  | -29.4818866800 | 14.6433814309 |
| H | -3.7551490507  | -30.8574950278 | 11.9846682946 |
| H | -4.5826686330  | -35.9968679046 | 16.3655640728 |
| H | -8.8063420766  | -29.9975071608 | 20.3484137169 |
| H | -0.9821576877  | -30.4300995240 | 20.1618408950 |
| H | -8.6608662133  | -22.1714814202 | 15.2115139629 |
| H | -7.0684544832  | -22.8846354755 | 14.9488488060 |
| H | -4.0041669687  | -24.8392715299 | 19.9411227192 |
| H | -2.2344244989  | -24.8549501522 | 19.9756705585 |

|    |               |                |               |
|----|---------------|----------------|---------------|
| H  | 0.9794841215  | -37.1695828279 | 16.3426077711 |
| H  | 1.2414385977  | -36.8265262587 | 18.0623966798 |
| H  | -5.9303660329 | -37.6979254960 | 18.1792089832 |
| H  | -6.8369218028 | -36.8190943947 | 19.4189237666 |
| H  | -9.0151150925 | -34.1326828127 | 19.9577361775 |
| H  | -9.2917494763 | -32.9763437222 | 21.2702798491 |
| S  | -0.0559170776 | -29.3975423155 | 14.6627582193 |
| C  | -0.9278582720 | -30.6523750541 | 15.6575549828 |
| C  | -0.0720415935 | -28.0244659748 | 15.8680445546 |
| H  | 0.4895019139  | -28.2917856589 | 16.7701830935 |
| H  | 0.4195221405  | -27.1714080467 | 15.3931817215 |
| H  | -1.0999202225 | -27.7581233509 | 16.1251787790 |
| H  | -1.9093983945 | -30.2899688741 | 15.9670267370 |
| H  | -1.0600700808 | -31.5369337677 | 15.0289812045 |
| H  | -0.3393549486 | -30.9353254205 | 16.5363791276 |
| H  | 0.0134600477  | -32.3123756111 | 21.4444429960 |
| H  | -1.0213569807 | -33.7387176801 | 21.2654300191 |
| Fe | -5.0313884397 | -30.8697283296 | 16.9596236719 |

### React<sub>B-Fe(III),VI</sub>

|   |               |                |               |
|---|---------------|----------------|---------------|
| C | -5.8570000000 | -37.2390000000 | 19.1710000000 |
| C | -4.7017448353 | -36.3975323428 | 18.6038469385 |
| C | -5.1238431685 | -35.0605369700 | 18.0822061609 |
| N | -6.0057780762 | -34.8996418126 | 17.0249748001 |
| C | -4.7613431898 | -33.7818637677 | 18.4244683517 |
| C | -6.1282724225 | -33.5728852234 | 16.7607514015 |
| N | -5.3745475111 | -32.8687114354 | 17.5867476078 |
| C | -0.1150000000 | -33.2510000000 | 20.8940000000 |
| C | 0.1187707540  | -32.4039268893 | 19.6276380015 |
| C | -1.0934656696 | -31.6124468179 | 19.2551802820 |
| N | -1.4868308977 | -30.4591118484 | 19.9186136546 |
| C | -2.0965946336 | -31.8556459355 | 18.3517335648 |
| C | -2.6796779114 | -30.0539401698 | 19.4086206357 |
| N | -3.0804087502 | -30.8901695969 | 18.4663965049 |
| C | -3.1080000000 | -25.0240000000 | 19.3380000000 |
| C | -3.4484009532 | -26.4005017451 | 18.7532305181 |
| C | -4.1701534728 | -26.3199021058 | 17.4009391501 |
| C | -4.4372183687 | -27.6788464071 | 16.7448614388 |
| O | -4.3795236796 | -27.7705888883 | 15.4993456075 |
| O | -4.7223750182 | -28.6384338146 | 17.5502271325 |
| C | -8.1410000000 | -23.1040000000 | 14.9750000000 |
| C | -7.1063000514 | -24.2287764995 | 15.1873098810 |
| C | -7.5424553509 | -25.5535838177 | 14.6104801210 |
| C | -7.6924154511 | -26.7040138502 | 15.4196207121 |

|   |               |                |               |
|---|---------------|----------------|---------------|
| C | -7.8117980566 | -25.6606905851 | 13.2182311361 |
| C | -8.0806767396 | -27.9142899886 | 14.8858848930 |
| C | -8.2076164933 | -26.8493654808 | 12.6550498155 |
| C | -8.3391927201 | -28.0484349997 | 13.4640095570 |
| O | -8.6019703957 | -29.1636489048 | 12.9368907546 |
| C | -9.7310000000 | -33.4130000000 | 20.3670000000 |
| C | -9.7419009839 | -31.8801868381 | 20.2013440751 |
| C | -8.3730816567 | -31.3330562763 | 19.9506931290 |
| N | -7.3952769628 | -31.2735235915 | 20.9343980171 |
| C | -7.7405364181 | -30.9159503427 | 18.8073903514 |
| C | -6.2397793346 | -30.8386338308 | 20.3663659400 |
| N | -6.4192767472 | -30.6158127600 | 19.0791535191 |
| C | 0.6730000000  | -36.5290000000 | 17.1750000000 |
| C | -0.4126373244 | -37.0461391488 | 16.2138979724 |
| C | -1.1273988678 | -35.9186042147 | 15.4999414981 |
| C | -0.8077133244 | -35.5546527056 | 14.1850532780 |
| C | -2.1038696553 | -35.1635252494 | 16.1615442618 |
| C | -1.4220974724 | -34.4736493232 | 13.5520019376 |
| C | -2.7383552097 | -34.0890772220 | 15.5416336736 |
| C | -2.3862718956 | -33.7282936158 | 14.2343906185 |
| O | -2.9709524636 | -32.6632546798 | 13.6079383768 |
| C | -5.4711298202 | -29.2678620599 | 13.0165570251 |
| C | -5.8520880635 | -30.6990282136 | 13.4250267667 |
| C | -5.5885502712 | -30.8804315732 | 14.9113359953 |
| O | -6.5138902653 | -30.6755403634 | 15.7427849872 |
| O | -4.4037313503 | -31.1738494667 | 15.2943242303 |
| H | -3.9476975596 | -36.2273781216 | 19.3802064563 |
| H | -4.1950121491 | -36.9527308543 | 17.8023321328 |
| H | -4.0789426893 | -33.4631511271 | 19.1967136149 |
| H | -6.7539898878 | -33.1585552629 | 15.9853276113 |
| H | -5.4886710946 | -38.1991659949 | 19.5439725625 |
| H | 0.9788179496  | -31.7376902414 | 19.7737603414 |
| H | 0.3711102212  | -33.0566536928 | 18.7853367981 |
| H | -2.1638443971 | -32.6526053432 | 17.6286819205 |
| H | -3.2023431547 | -29.1550463518 | 19.6966383146 |
| H | 0.7798688992  | -33.8265058143 | 21.1493402400 |
| H | -4.0828163767 | -26.9613301243 | 19.4496903888 |
| H | -2.5265433530 | -26.9856571650 | 18.6288489939 |
| H | -5.1441592436 | -25.8263039422 | 17.5341299590 |
| H | -3.6060485744 | -25.7071283906 | 16.6899084204 |
| H | -2.4493489042 | -24.4599086527 | 18.6677980070 |
| H | -6.1577099260 | -23.9335156681 | 14.7159770016 |
| H | -6.8970577701 | -24.3436936212 | 16.2565023248 |
| H | -7.4718632898 | -26.6335271360 | 16.4822282352 |

|   |                |                |               |
|---|----------------|----------------|---------------|
| H | -7.7024315490  | -24.7775266435 | 12.5931490021 |
| H | -8.1390939414  | -28.8146503597 | 15.4886180352 |
| H | -8.4217620659  | -26.9407727442 | 11.5936119541 |
| H | -9.0954478400  | -23.3589142973 | 15.4460600929 |
| H | -10.1828989154 | -31.4104038785 | 21.0904396724 |
| H | -10.3802800718 | -31.6012776233 | 19.3569789554 |
| H | -8.1241753383  | -30.8371800265 | 17.8014463437 |
| H | -5.3120746474  | -30.7124561762 | 20.9043281053 |
| H | -10.7423748280 | -33.7945983425 | 20.5365793192 |
| H | -1.1382556043  | -37.6459447127 | 16.7793914695 |
| H | 0.0418928516   | -37.7223174433 | 15.4804780414 |
| H | -2.3768526838  | -35.4156349688 | 17.1841240205 |
| H | -0.0577029333  | -36.1261245330 | 13.6427807790 |
| H | -3.5035703470  | -33.5212437015 | 16.0567896201 |
| H | -1.1643891768  | -34.1982617220 | 12.5337224265 |
| H | -3.5156782655  | -32.1628146463 | 14.2661724208 |
| H | 0.2362110864   | -35.8694738649 | 17.9345659170 |
| H | -5.5797344214  | -28.5728382213 | 13.8515921910 |
| H | -6.0768498817  | -28.9429143302 | 12.1675706707 |
| H | -6.9261389349  | -30.7873541692 | 13.2440271309 |
| H | -5.3197647039  | -31.4549537788 | 12.8381648553 |
| H | -6.4531218230  | -35.6446690757 | 16.5107053587 |
| H | -7.5295260167  | -31.4923919427 | 21.9108128039 |
| H | -0.9578708645  | -29.9812015486 | 20.6337523672 |
| H | -7.7817157528  | -22.1681640648 | 15.4140369257 |
| H | -8.3293474447  | -22.9245411822 | 13.9121657174 |
| H | -4.0133153517  | -24.4255111687 | 19.4924699787 |
| H | -2.6007761304  | -25.1147580812 | 20.3043865098 |
| H | 1.4292625615   | -35.9528830292 | 16.6313501586 |
| H | 1.1766669658   | -37.3535748548 | 17.6907423210 |
| H | -6.6133020105  | -37.4512789484 | 18.4065016875 |
| H | -6.3533806304  | -36.7171497177 | 19.9952390327 |
| H | -9.3261229243  | -33.8925648745 | 19.4701383416 |
| H | -9.1102595581  | -33.7171938695 | 21.2171762405 |
| S | -3.7571678202  | -29.0114201078 | 12.3680517924 |
| C | -2.5620958488  | -29.4468792962 | 13.6735132707 |
| C | -3.7202252464  | -27.1902943597 | 12.4823169339 |
| H | -2.7592627867  | -26.8534483000 | 12.0889761267 |
| H | -4.5322881173  | -26.8068629271 | 11.8616504031 |
| H | -3.8576606135  | -26.9181114029 | 13.5326081985 |
| H | -2.3709599820  | -30.5169097953 | 13.6002538158 |
| H | -1.6590891099  | -28.8805135143 | 13.4297933311 |
| H | -2.9816607594  | -29.1580066181 | 14.6376929760 |
| H | -0.3674018717  | -32.6211852664 | 21.7540964249 |

|    |               |                |               |
|----|---------------|----------------|---------------|
| H  | -0.9410726542 | -33.9523136031 | 20.7385503553 |
| Fe | -4.9908909506 | -30.6316652590 | 17.4280253292 |

**TS<sub>B-Fe(III),VI</sub>**

|   |                |                 |                |
|---|----------------|-----------------|----------------|
| C | -5.8570000000# | -37.2390000000# | 19.1710000000# |
| C | -4.6876500000# | -36.3768980000# | 18.6655600000# |
| C | -5.0900830000# | -35.0493270000# | 18.1048330000# |
| N | -5.9221860000# | -34.9054470000# | 17.0053270000# |
| C | -4.7325040000# | -33.7654960000# | 18.4347580000# |
| C | -6.0221570000# | -33.5846270000# | 16.7060510000# |
| N | -5.3026640000  | -32.8670160000  | 17.5513130000  |
| C | -0.1150000000  | -33.2510000000  | 20.8940000000  |
| C | 0.1337430000   | -32.3556730000  | 19.6649020000  |
| C | -1.0818980000  | -31.5725320000  | 19.2872120000  |
| N | -1.5021240000  | -30.4369920000  | 19.9640940000  |
| C | -2.0707070000  | -31.8163290000  | 18.3676690000  |
| C | -2.6940700000  | -30.0407590000  | 19.4447980000  |
| N | -3.0692800000  | -30.8667210000  | 18.4827120000  |
| C | -3.1080000000  | -25.0240000000  | 19.3380000000  |
| C | -3.3778590000  | -26.4205410000  | 18.7654750000  |
| C | -3.9320470000  | -26.3805100000  | 17.3350300000  |
| C | -4.1336770000  | -27.7560990000  | 16.6979430000  |
| O | -3.7843140000  | -27.9281730000  | 15.5112600000  |
| O | -4.6729130000  | -28.6502500000  | 17.4491770000  |
| C | -8.1410000000  | -23.1040000000  | 14.9750000000  |
| C | -6.8533970000  | -23.9485420000  | 15.0281870000  |
| C | -7.0732330000  | -25.3531640000  | 14.5200090000  |
| C | -7.2151770000  | -26.4378960000  | 15.4038360000  |
| C | -7.1867010000  | -25.5966250000  | 13.1375340000  |
| C | -7.4536430000  | -27.7241180000  | 14.9394500000  |
| C | -7.4152360000  | -26.8763950000  | 12.6519540000  |
| C | -7.5585350000  | -27.9575290000  | 13.5506130000  |
| O | -7.7723860000  | -29.1904200000  | 13.0674670000  |
| C | -9.7310000000  | -33.4130000000  | 20.3670000000  |
| C | -9.7394740000  | -31.8938570000  | 20.1062850000  |
| C | -8.3689880000  | -31.3491280000  | 19.8608540000  |
| N | -7.4018690000  | -31.2742150000  | 20.8539710000  |
| C | -7.7287120000  | -30.9317990000  | 18.7217760000  |
| C | -6.2449370000  | -30.8330920000  | 20.2951130000  |
| N | -6.4117010000  | -30.6197480000  | 19.0037760000  |
| C | 0.6730000000   | -36.5290000000  | 17.1750000000  |
| C | -0.4827120000  | -37.0905420000  | 16.3296300000  |
| C | -1.2057380000  | -36.0077690000  | 15.5598870000  |
| C | -0.9819310000  | -35.7958280000  | 14.1927650000  |

|   |                |                |               |
|---|----------------|----------------|---------------|
| C | -2.0904160000  | -35.1417720000 | 16.2151060000 |
| C | -1.6082560000  | -34.7596160000 | 13.4990050000 |
| C | -2.7292380000  | -34.1040030000 | 15.5395110000 |
| C | -2.4829820000  | -33.9041440000 | 14.1742090000 |
| O | -3.0843720000  | -32.8886650000 | 13.4819630000 |
| C | -4.7815210000  | -29.2505300000 | 12.9911430000 |
| C | -5.5682830000  | -30.4522830000 | 13.3786420000 |
| C | -5.4393380000  | -30.8319180000 | 14.8296010000 |
| O | -6.4030970000  | -30.6969300000 | 15.6294040000 |
| O | -4.2885190000  | -31.2208200000 | 15.2258350000 |
| H | -3.9849290000  | -36.1884020000 | 19.4840230000 |
| H | -4.1236900000  | -36.9287930000 | 17.9013450000 |
| H | -4.0830130000  | -33.4338670000 | 19.2292060000 |
| H | -6.6063280000  | -33.1828060000 | 15.8930290000 |
| H | -5.4887850000  | -38.1861320000 | 19.5744450000 |
| H | 0.9771860000   | -31.6805220000 | 19.8558910000 |
| H | 0.4191080000   | -32.9741440000 | 18.8078510000 |
| H | -2.1194720000  | -32.6061480000 | 17.6353630000 |
| H | -3.2312010000  | -29.1543240000 | 19.7436040000 |
| H | 0.7834910000   | -33.8202450000 | 21.1493190000 |
| H | -4.0918000000  | -26.9596500000 | 19.3993020000 |
| H | -2.4463200000  | -27.0037410000 | 18.7711410000 |
| H | -4.9073030000  | -25.8754560000 | 17.3376340000 |
| H | -3.2764280000  | -25.7993850000 | 16.6795760000 |
| H | -2.3788940000  | -24.4810030000 | 18.7267440000 |
| H | -6.0779570000  | -23.4594560000 | 14.4254800000 |
| H | -6.4769660000  | -23.9820720000 | 16.0569050000 |
| H | -7.1327020000  | -26.2670330000 | 16.4737530000 |
| H | -7.0900120000  | -24.7658790000 | 12.4429480000 |
| H | -7.5252810000  | -28.5693670000 | 15.6139300000 |
| H | -7.5042920000  | -27.0735570000 | 11.5878160000 |
| H | -8.9261090000  | -23.5516630000 | 15.5922870000 |
| H | -10.2078760000 | -31.3734540000 | 20.9517500000 |
| H | -10.3538030000 | -31.6699480000 | 19.2289140000 |
| H | -8.1084150000  | -30.8574170000 | 17.7135430000 |
| H | -5.3249120000  | -30.6973820000 | 20.8430270000 |
| H | -10.7466130000 | -33.7850750000 | 20.5291690000 |
| H | -1.1892350000  | -37.6123960000 | 16.9884500000 |
| H | -0.0942650000  | -37.8444030000 | 15.6356520000 |
| H | -2.2878690000  | -35.2770780000 | 17.2762610000 |
| H | -0.3023620000  | -36.4540140000 | 13.6569160000 |
| H | -3.4192090000  | -33.4459560000 | 16.0523420000 |
| H | -1.4312610000  | -34.6048480000 | 12.4394030000 |
| H | -3.5743800000  | -32.3213540000 | 14.1226030000 |

|    |               |                |               |
|----|---------------|----------------|---------------|
| H  | 0.3033740000  | -35.7927160000 | 17.8985900000 |
| H  | -4.7901680000 | -28.4981280000 | 13.7830610000 |
| H  | -5.1398260000 | -28.8328480000 | 12.0450160000 |
| H  | -6.9062210000 | -29.8681790000 | 13.2817190000 |
| H  | -5.6095320000 | -31.2793570000 | 12.6680210000 |
| H  | -6.3469620000 | -35.6589560000 | 16.4849270000 |
| H  | -7.5435570000 | -31.4922930000 | 21.8292490000 |
| H  | -0.9901590000 | -29.9641070000 | 20.6946110000 |
| H  | -7.9556650000 | -22.0884430000 | 15.3379490000 |
| H  | -8.5210200000 | -23.0358710000 | 13.9508270000 |
| H  | -4.0258080000 | -24.4259190000 | 19.3668060000 |
| H  | -2.7143610000 | -25.0783150000 | 20.3581690000 |
| H  | 1.4095570000  | -36.0268220000 | 16.5395050000 |
| H  | 1.1841120000  | -37.3222490000 | 17.7303830000 |
| H  | -6.5604010000 | -37.4764490000 | 18.3653410000 |
| H  | -6.4135720000 | -36.7220030000 | 19.9584520000 |
| H  | -9.2986720000 | -33.9466660000 | 19.5149970000 |
| H  | -9.1377530000 | -33.6621740000 | 21.2535310000 |
| S  | -2.9311480000 | -29.4228380000 | 12.5616250000 |
| C  | -1.9852830000 | -29.8801750000 | 14.0531180000 |
| C  | -2.5730550000 | -27.6333840000 | 12.5166580000 |
| H  | -1.5210190000 | -27.5084190000 | 12.2541640000 |
| H  | -3.2012550000 | -27.1869720000 | 11.7436200000 |
| H  | -2.7994570000 | -27.2179900000 | 13.5023280000 |
| H  | -1.9331790000 | -30.9650350000 | 14.0770410000 |
| H  | -0.9919210000 | -29.4496000000 | 13.9003110000 |
| H  | -2.4881590000 | -29.4591430000 | 14.9241130000 |
| H  | -0.3972530000 | -32.6566780000 | 21.7694510000 |
| H  | -0.9248210000 | -33.9594400000 | 20.6939940000 |
| Fe | -4.9477570000 | -30.6462100000 | 17.3876530000 |

### **Prod<sub>B-Fe(III),VI</sub>**

|   |               |                |               |
|---|---------------|----------------|---------------|
| C | -5.8570000000 | -37.2390000000 | 19.1710000000 |
| C | -4.7287761880 | -36.4027293041 | 18.5399340592 |
| C | -5.1495768706 | -35.0505383624 | 18.0511324939 |
| N | -6.0230737488 | -34.8536648947 | 16.9921594168 |
| C | -4.7808998140 | -33.7834939697 | 18.4299565371 |
| C | -6.1365413065 | -33.5189563910 | 16.7647486727 |
| N | -5.3878349817 | -32.8426143131 | 17.6185659562 |
| C | -0.1150000000 | -33.2510000000 | 20.8940000000 |
| C | 0.1226619756  | -32.2873135209 | 19.7166956591 |
| C | -1.1206713271 | -31.5271875028 | 19.3918579841 |
| N | -1.5567993481 | -30.4339389267 | 20.1256973570 |
| C | -2.1327424581 | -31.7809185781 | 18.5020938832 |

|   |               |                |               |
|---|---------------|----------------|---------------|
| C | -2.7828769578 | -30.0694913464 | 19.6686490964 |
| N | -3.1612094010 | -30.8774955125 | 18.6933874709 |
| C | -3.1080000000 | -25.0240000000 | 19.3380000000 |
| C | -3.4920717067 | -26.4216319167 | 18.8345115391 |
| C | -3.7160777464 | -26.4676777692 | 17.3202220733 |
| C | -4.2215381892 | -27.7997795820 | 16.7552159052 |
| O | -4.1735773441 | -27.9783062846 | 15.5202404775 |
| O | -4.6965303960 | -28.6408760107 | 17.6041436275 |
| C | -8.1410000000 | -23.1040000000 | 14.9750000000 |
| C | -6.9965613532 | -24.0098903740 | 14.4970257605 |
| C | -7.3982618878 | -25.4674024993 | 14.5125068134 |
| C | -7.1063855991 | -26.2878475876 | 15.6069222278 |
| C | -8.1444498021 | -26.0239971404 | 13.4614107115 |
| C | -7.4929717911 | -27.6265150302 | 15.6453365651 |
| C | -8.5458479774 | -27.3591727002 | 13.4823607735 |
| C | -8.1972632410 | -28.1758191090 | 14.5661471848 |
| O | -8.5093130019 | -29.5042359503 | 14.5035786493 |
| C | -9.7310000000 | -33.4130000000 | 20.3670000000 |
| C | -9.7601782272 | -31.8736910923 | 20.2900447387 |
| C | -8.3959566275 | -31.3163843520 | 20.0437932457 |
| N | -7.3951379245 | -31.3403035497 | 21.0049070405 |
| C | -7.7800208638 | -30.8430443401 | 18.9137172541 |
| C | -6.2431131657 | -30.8992084002 | 20.4386969167 |
| N | -6.4454476741 | -30.5921226729 | 19.1713341997 |
| C | 0.6730000000  | -36.5290000000 | 17.1750000000 |
| C | -0.4231906281 | -36.9618088853 | 16.1847260299 |
| C | -1.0316160727 | -35.7652044715 | 15.4895704809 |
| C | -0.4963754942 | -35.2629858884 | 14.2957315922 |
| C | -2.0875792221 | -35.0594124311 | 16.0752308230 |
| C | -0.9713325889 | -34.0860649220 | 13.7193614982 |
| C | -2.5887579452 | -33.8897138209 | 15.5065234805 |
| C | -2.0096552950 | -33.3824700338 | 14.3342459319 |
| O | -2.4346008221 | -32.2087857195 | 13.7746784042 |
| C | -5.6694948803 | -29.2846237815 | 12.9749123107 |
| C | -5.3081264155 | -30.6069626332 | 13.5058194440 |
| C | -5.2662097865 | -30.7942808785 | 14.9740572469 |
| O | -6.3061878954 | -30.5991048808 | 15.6771885700 |
| O | -4.1631656901 | -31.1299247187 | 15.5051136884 |
| H | -3.9276278144 | -36.2509817626 | 19.2713050759 |
| H | -4.2778651242 | -36.9599793085 | 17.7074183088 |
| H | -4.0991854866 | -33.4900476934 | 19.2124683026 |
| H | -6.7487877913 | -33.0791196549 | 15.9923306837 |
| H | -5.4739296130 | -38.2055865158 | 19.5104359843 |
| H | 0.9448290920  | -31.5984046540 | 19.9482761026 |



|   |                |                |               |
|---|----------------|----------------|---------------|
| H | 0.4266116803   | -32.8499427058 | 18.8281028440 |
| H | -2.1811958644  | -32.5438394487 | 17.7406772745 |
| H | -3.3408825749  | -29.2126578160 | 20.0136674491 |
| H | 0.7962713611   | -33.8059905394 | 21.1372903787 |
| H | -4.4032565614  | -26.7693551027 | 19.3349390259 |
| H | -2.7020694243  | -27.1387384742 | 19.0957679441 |
| H | -4.4506483813  | -25.7052601947 | 17.0258682282 |
| H | -2.7979734171  | -26.2111391235 | 16.7777079212 |
| H | -2.1867175441  | -24.6674453807 | 18.8622599943 |
| H | -6.6989266492  | -23.7131113029 | 13.4828036000 |
| H | -6.1172576329  | -23.8612202394 | 15.1363011951 |
| H | -6.5554873137  | -25.8773217974 | 16.4484160738 |
| H | -8.4148187346  | -25.4011009960 | 12.6109037653 |
| H | -7.2005453654  | -28.2553082204 | 16.4802656766 |
| H | -9.1091599378  | -27.7927944488 | 12.6610655843 |
| H | -8.4417720770  | -23.3664231454 | 15.9947345185 |
| H | -10.1841227150 | -31.4578337182 | 21.2133752407 |
| H | -10.4159264117 | -31.5507803675 | 19.4754650654 |
| H | -8.1950090841  | -30.6854253073 | 17.9296417991 |
| H | -5.2991789289  | -30.8331246602 | 20.9581616705 |
| H | -10.7351436732 | -33.8156259008 | 20.5309550057 |
| H | -1.2011821111  | -37.5194434668 | 16.7220763052 |
| H | 0.0017310060   | -37.6524617639 | 15.4470521465 |
| H | -2.5254759376  | -35.4216072247 | 17.0021985287 |
| H | 0.3206818278   | -35.7954145893 | 13.8139573458 |
| H | -3.4162623635  | -33.3615633564 | 15.9661514029 |
| H | -0.5400292341  | -33.6947106207 | 12.8031256503 |
| H | -3.0174557182  | -31.7564285478 | 14.4294449475 |
| H | 0.2619470605   | -35.8531387998 | 17.9343335435 |
| H | -5.9723709380  | -28.6014380371 | 13.7670282591 |
| H | -6.4215462844  | -29.3124327515 | 12.1805177654 |
| H | -7.8399673720  | -29.9966217320 | 15.0265981564 |
| H | -4.9144210372  | -31.3921875989 | 12.8668757379 |
| H | -6.4699025885  | -35.5811921751 | 16.4529102091 |
| H | -7.5132751468  | -31.6166728400 | 21.9688717553 |
| H | -1.0339451530  | -29.9664594444 | 20.8523087944 |
| H | -7.8469826487  | -22.0487809814 | 14.9662981810 |
| H | -9.0197972924  | -23.2176338796 | 14.3316433205 |
| H | -3.8967283819  | -24.2953179875 | 19.1169292922 |
| H | -2.9465880179  | -25.0197506310 | 20.4212603636 |
| H | 1.4743294573   | -35.9936985869 | 16.6548050584 |
| H | 1.1151536971   | -37.3899879844 | 17.6883779982 |
| H | -6.6615141460  | -37.4348788630 | 18.4532600922 |
| H | -6.2946130264  | -36.7209246086 | 20.0298347742 |

|    |               |                |               |
|----|---------------|----------------|---------------|
| H  | -9.3367569883 | -33.8357299466 | 19.4374304890 |
| H  | -9.0931122079 | -33.7588265304 | 21.1880244846 |
| S  | -4.2029581033 | -28.4181372889 | 12.1252711241 |
| C  | -2.7488737747 | -28.9975334452 | 13.0602274401 |
| C  | -4.4324827319 | -26.7214009080 | 12.7596594541 |
| H  | -3.6922492534 | -26.0844897237 | 12.2710404041 |
| H  | -5.4443309368 | -26.4130112857 | 12.4863263644 |
| H  | -4.3167769008 | -26.7529685666 | 13.8474691431 |
| H  | -2.5517822909 | -30.0313210955 | 12.7709882839 |
| H  | -1.9184328503 | -28.3587653229 | 12.7501811730 |
| H  | -2.9570795686 | -28.8992748337 | 14.1280463876 |
| H  | -0.4305369351 | -32.7106829877 | 21.7931728215 |
| H  | -0.8988024321 | -33.9730964532 | 20.6439844120 |
| Fe | -4.9863205254 | -30.6179776426 | 17.5702308531 |

### React<sub>Mg(II),I</sub>

|   |               |                |               |
|---|---------------|----------------|---------------|
| C | -5.8569950000 | -37.2389910000 | 19.1709910000 |
| C | -5.1437657503 | -35.8947631817 | 19.3933304566 |
| C | -5.4908263338 | -34.8309163886 | 18.3996175955 |
| N | -5.2340826086 | -34.9454701707 | 17.0439565942 |
| C | -5.9846663716 | -33.5584546866 | 18.5499318823 |
| C | -5.5514914304 | -33.7614969390 | 16.4539547682 |
| N | -6.0011178958 | -32.8877593717 | 17.3390694009 |
| C | -0.1150060000 | -33.2509900000 | 20.8939940000 |
| C | -0.6217446554 | -33.2597594996 | 19.4359032869 |
| C | -1.7310662784 | -32.2950910036 | 19.1277809584 |
| N | -1.7233179087 | -30.9693299117 | 19.5410821211 |
| C | -2.8721258081 | -32.4091633201 | 18.3684497819 |
| C | -2.8202059571 | -30.3519916371 | 19.0231311782 |
| N | -3.5383033045 | -31.1985745652 | 18.3070346808 |
| C | -3.1080190000 | -25.0239970000 | 19.3379980000 |
| C | -3.2932819515 | -26.4231867796 | 18.7499358637 |
| C | -3.5930982429 | -26.3801778560 | 17.2513862320 |
| C | -3.8047253026 | -27.7459981241 | 16.5990954238 |
| O | -3.4799780993 | -27.8663294758 | 15.3908778832 |
| O | -4.3300497296 | -28.6507259930 | 17.3226481063 |
| C | -8.1409660000 | -23.1040170000 | 14.9750030000 |
| C | -8.9562884136 | -24.1306449809 | 15.8008158525 |
| C | -8.3972514896 | -25.5448368814 | 15.8978291656 |
| C | -7.5280691983 | -25.9310048765 | 16.9331687045 |
| C | -8.7944248716 | -26.5625316736 | 15.0161791905 |
| C | -7.0682886302 | -27.2396349147 | 17.0798977239 |
| C | -8.3453269327 | -27.8791330188 | 15.1476574027 |
| C | -7.4433320699 | -28.2711353919 | 16.1752739205 |

|   |               |                |               |
|---|---------------|----------------|---------------|
| O | -7.0005380470 | -29.5113834551 | 16.2631553207 |
| C | -9.7309990000 | -33.4130130000 | 20.3670160000 |
| C | -9.7181526142 | -31.8663229812 | 20.3795055485 |
| C | -8.3855916506 | -31.2672700120 | 20.0435707871 |
| N | -7.3216339715 | -31.2067817354 | 20.9391120686 |
| C | -7.8770506402 | -30.7651405078 | 18.8728818760 |
| C | -6.2406129609 | -30.6972568233 | 20.2822125714 |
| N | -6.5439450839 | -30.4318374768 | 19.0275790760 |
| C | 0.6729850000  | -36.5289920000 | 17.1749980000 |
| C | -0.8153625276 | -36.7773150166 | 17.4760774732 |
| C | -1.7388635368 | -36.2436468472 | 16.3992826245 |
| C | -1.7622801785 | -34.8782119545 | 16.0753362684 |
| C | -2.5839933280 | -37.0918939465 | 15.6732449538 |
| C | -2.5906106710 | -34.3697511434 | 15.0799203262 |
| C | -3.4207679782 | -36.6053931011 | 14.6657308853 |
| C | -3.4314286971 | -35.2364762079 | 14.3566424211 |
| O | -4.2864551487 | -34.8033583146 | 13.4084490945 |
| C | -5.6913215304 | -29.0302607867 | 13.5569247401 |
| C | -6.0864424517 | -30.4994113736 | 13.5647812949 |
| C | -4.9608691349 | -31.3810307678 | 14.1174300211 |
| O | -4.6196235542 | -31.2144052753 | 15.3248953487 |
| O | -4.4193462958 | -32.1927705429 | 13.3145567968 |
| H | -5.3803242966 | -35.5085858257 | 20.3910617680 |
| H | -4.0561386554 | -36.0590805978 | 19.3788126017 |
| H | -6.2960233853 | -33.0834761150 | 19.4650653390 |
| H | -5.4080025232 | -33.5835357615 | 15.4032800038 |
| H | -5.5610231338 | -37.9683041919 | 19.9319327417 |
| H | 0.2294669023  | -33.0680236735 | 18.7661376741 |
| H | -0.9809349126 | -34.2607542236 | 19.1794935568 |
| H | -3.2384679350 | -33.2759900165 | 17.8436684496 |
| H | -3.0543368252 | -29.3067086540 | 19.1480670549 |
| H | 0.6685034928  | -34.0022173868 | 21.0286207330 |
| H | -4.1093978107 | -26.9488993342 | 19.2579396372 |
| H | -2.3835979523 | -27.0167357227 | 18.9219937345 |
| H | -4.5224285525 | -25.8190118444 | 17.0794298764 |
| H | -2.7996655423 | -25.8570072121 | 16.7069656046 |
| H | -2.2799269976 | -24.4955653163 | 18.8510198381 |
| H | -9.0772128805 | -23.7306021505 | 16.8164435609 |
| H | -9.9689603479 | -24.1808670596 | 15.3790858711 |
| H | -7.2166619471 | -25.1849793596 | 17.6649217896 |
| H | -9.5011180548 | -26.3273356875 | 14.2201537299 |
| H | -6.3989298073 | -27.5013450541 | 17.8914309723 |
| H | -8.7077805409 | -28.6482016409 | 14.4674036384 |
| H | -8.0389767287 | -23.4334802500 | 13.9347275168 |

|    |                |                |               |
|----|----------------|----------------|---------------|
| H  | -10.0600426522 | -31.5026140889 | 21.3582172674 |
| H  | -10.4409921810 | -31.4923864119 | 19.6473334859 |
| H  | -8.3468324085  | -30.6312102511 | 17.9111737201 |
| H  | -5.2684925326  | -30.5709758475 | 20.7341133147 |
| H  | -10.7355201498 | -33.7927658164 | 20.5773870313 |
| H  | -1.0640805346  | -36.3224811387 | 18.4460448675 |
| H  | -0.9864858322  | -37.8533685690 | 17.6001907064 |
| H  | -2.5880442300  | -38.1575356378 | 15.8937461984 |
| H  | -1.1286740206  | -34.1856477680 | 16.6237838845 |
| H  | -4.0723473584  | -37.2687401473 | 14.1051144789 |
| H  | -2.6327669506  | -33.3040540737 | 14.8764122199 |
| H  | -4.2702770645  | -33.8093900580 | 13.3499422640 |
| H  | 0.8852479400   | -35.4581877682 | 17.0902625389 |
| H  | -5.2416225903  | -28.7261954756 | 14.5033392323 |
| H  | -6.5337844427  | -28.3761683080 | 13.3213587535 |
| H  | -6.9224489944  | -30.5450059695 | 14.2711729157 |
| H  | -6.3944030620  | -30.8559101370 | 12.5781567562 |
| H  | -4.7837874769  | -35.7195959809 | 16.5695941292 |
| H  | -7.3548334742  | -31.4648149494 | 21.9136714659 |
| H  | -1.0125737569  | -30.5281107063 | 20.1035764603 |
| H  | -8.6299556030  | -22.1232782390 | 14.9778248190 |
| H  | -7.1321305736  | -22.9860468436 | 15.3861898626 |
| H  | -4.0111952501  | -24.4186644262 | 19.1974655342 |
| H  | -2.8948086084  | -25.0578899067 | 20.4126775089 |
| H  | 0.9587637338   | -36.9978525825 | 16.2280538824 |
| H  | 1.3105193656   | -36.9364816841 | 17.9672927193 |
| H  | -5.6073687982  | -37.6603268708 | 18.1908578757 |
| H  | -6.9436001426  | -37.1158236057 | 19.2137787681 |
| H  | -9.4087297990  | -33.7897317980 | 19.3920034431 |
| H  | -9.0490588017  | -33.8204280370 | 21.1219607328 |
| S  | -4.4475752553  | -28.6232190576 | 12.2548616407 |
| C  | -2.9037900711  | -29.3851335422 | 12.8595361939 |
| C  | -4.1578765305  | -26.8672852534 | 12.6492714979 |
| H  | -3.3939035817  | -26.4959506873 | 11.9629609034 |
| H  | -5.1005846817  | -26.3422843228 | 12.4812286716 |
| H  | -3.8432926812  | -26.8084605016 | 13.6975641956 |
| H  | -2.8319464503  | -29.1786690575 | 13.9313433493 |
| H  | -2.9714606924  | -30.4529980640 | 12.6470431939 |
| H  | -2.0896434581  | -28.9242506007 | 12.2956123614 |
| H  | 0.3138431066   | -32.2804357531 | 21.1692103042 |
| H  | -0.9273900283  | -33.4699495342 | 21.5938430449 |
| Mg | -5.3680995016  | -30.4019965974 | 17.0801433874 |

**TS<sub>Mg(II),I</sub>**

|   |             |              |             |
|---|-------------|--------------|-------------|
| C | -5.85699500 | -37.23899100 | 19.17099100 |
| C | -5.19212100 | -35.87902000 | 19.44856600 |
| C | -5.51373900 | -34.79873900 | 18.46196400 |
| N | -5.28462800 | -34.92188100 | 17.10100300 |
| C | -5.93557900 | -33.50060800 | 18.62321000 |
| C | -5.54885000 | -33.72390900 | 16.51559300 |
| N | -5.93664800 | -32.82992100 | 17.41038900 |
| C | -0.11500600 | -33.25099000 | 20.89399400 |
| C | -0.56842600 | -33.23500000 | 19.42177700 |
| C | -1.67318800 | -32.27085000 | 19.11205300 |
| N | -1.64089400 | -30.93444000 | 19.48876700 |
| C | -2.84578500 | -32.40108100 | 18.40744900 |
| C | -2.75529900 | -30.32568200 | 19.00298200 |
| N | -3.50918900 | -31.18833000 | 18.34350100 |
| C | -3.10801900 | -25.02399700 | 19.33799800 |
| C | -3.23866800 | -26.44169400 | 18.78499500 |
| C | -3.53456600 | -26.45598000 | 17.28285000 |
| C | -3.67824200 | -27.86334200 | 16.70445000 |
| O | -3.10138400 | -28.13301200 | 15.62841000 |
| O | -4.41591700 | -28.66022900 | 17.38150700 |
| C | -8.14096600 | -23.10401700 | 14.97500300 |
| C | -8.91602500 | -24.17094900 | 15.78461700 |
| C | -8.33122000 | -25.57732500 | 15.80645900 |
| C | -7.58654700 | -26.05100800 | 16.89998400 |
| C | -8.57999900 | -26.49430800 | 14.77468900 |
| C | -7.10995300 | -27.36116200 | 16.97028000 |
| C | -8.11988700 | -27.81361600 | 14.83126200 |
| C | -7.37150000 | -28.28236400 | 15.93463400 |
| O | -6.93563600 | -29.56309400 | 15.97767500 |
| C | -9.73099900 | -33.41301300 | 20.36701600 |
| C | -9.83719200 | -31.88809800 | 20.13754200 |
| C | -8.52665100 | -31.23170700 | 19.82763000 |
| N | -7.53084500 | -31.02586000 | 20.77792000 |
| C | -7.97261900 | -30.79923000 | 18.65008000 |
| C | -6.44162400 | -30.50272600 | 20.14780500 |
| N | -6.67626600 | -30.36410100 | 18.85767200 |
| C | 0.67298500  | -36.52899200 | 17.17499800 |
| C | -0.81649000 | -36.73294200 | 17.50123900 |
| C | -1.75007600 | -36.18435900 | 16.44084500 |
| C | -1.76029300 | -34.81991900 | 16.10934900 |
| C | -2.62680000 | -37.02249400 | 15.73921500 |
| C | -2.60672500 | -34.30135100 | 15.13229700 |
| C | -3.48022700 | -36.52685800 | 14.75070400 |
| C | -3.48007800 | -35.15707000 | 14.43296600 |

|   |              |              |             |
|---|--------------|--------------|-------------|
| O | -4.35544400  | -34.72432100 | 13.50882300 |
| C | -5.21869900  | -28.85772200 | 13.51650600 |
| C | -5.85456600  | -30.11731600 | 13.64707100 |
| C | -4.98455300  | -31.26142500 | 14.14716500 |
| O | -4.57702800  | -31.23270600 | 15.35096600 |
| O | -4.70275100  | -32.15965400 | 13.31135700 |
| H | -5.48238100  | -35.51835400 | 20.44147800 |
| H | -4.10139700  | -36.01820900 | 19.48066200 |
| H | -6.19967500  | -33.00410900 | 19.54319800 |
| H | -5.42152300  | -33.54501200 | 15.46281100 |
| H | -5.57838000  | -37.96954700 | 19.93657200 |
| H | 0.30031700   | -33.02229100 | 18.78214500 |
| H | -0.91522200  | -34.23096800 | 19.13368400 |
| H | -3.23564600  | -33.28050700 | 17.92301000 |
| H | -2.97736100  | -29.27706300 | 19.11518400 |
| H | 0.67218100   | -33.99545900 | 21.04446500 |
| H | -4.03796100  | -26.98329700 | 19.30314600 |
| H | -2.30656400  | -26.99390200 | 18.97591000 |
| H | -4.48739400  | -25.94068700 | 17.09768700 |
| H | -2.75581600  | -25.92430700 | 16.72741800 |
| H | -2.29842400  | -24.47810900 | 18.84009500 |
| H | -9.01320100  | -23.81733300 | 16.81886400 |
| H | -9.93897500  | -24.22409200 | 15.38904800 |
| H | -7.38447500  | -25.37861400 | 17.73259900 |
| H | -9.17653200  | -26.18396900 | 13.91832100 |
| H | -6.52610100  | -27.69612000 | 17.81788600 |
| H | -8.36596200  | -28.50770800 | 14.03233700 |
| H | -8.05662800  | -23.39674600 | 13.92284400 |
| H | -10.29929400 | -31.41462400 | 21.01444800 |
| H | -10.50907600 | -31.69273300 | 19.29594800 |
| H | -8.38939800  | -30.78984400 | 17.65489200 |
| H | -5.51296400  | -30.26943000 | 20.64633400 |
| H | -10.71948000 | -33.84722900 | 20.54449100 |
| H | -1.03438600  | -36.26731400 | 18.47328200 |
| H | -1.01370600  | -37.80318900 | 17.63565500 |
| H | -2.64200600  | -38.08691300 | 15.96485600 |
| H | -1.10246900  | -34.13422600 | 16.63704600 |
| H | -4.15322600  | -37.18241600 | 14.20652400 |
| H | -2.63746500  | -33.23420500 | 14.93389200 |
| H | -4.38165200  | -33.72431600 | 13.45218200 |
| H | 0.91227200   | -35.46530900 | 17.07361600 |
| H | -4.57138000  | -28.52434100 | 14.32467800 |
| H | -5.72564600  | -28.07820600 | 12.95414600 |
| H | -6.52004500  | -29.84242200 | 14.73265800 |

|    |             |              |             |
|----|-------------|--------------|-------------|
| H  | -6.50331200 | -30.41617200 | 12.82284400 |
| H  | -4.87362900 | -35.71298900 | 16.61840400 |
| H  | -7.61249700 | -31.20700400 | 21.76678000 |
| H  | -0.90221500 | -30.48130600 | 20.00395400 |
| H  | -8.65084800 | -22.13597700 | 15.02187000 |
| H  | -7.12548700 | -22.97864900 | 15.36584600 |
| H  | -4.03233600 | -24.45673800 | 19.17770600 |
| H  | -2.89861500 | -25.02263500 | 20.41369700 |
| H  | 0.93106600  | -37.01551300 | 16.22921600 |
| H  | 1.31164600  | -36.94438300 | 17.96221600 |
| H  | -5.54486300 | -37.64005500 | 18.20055400 |
| H  | -6.94747900 | -37.14781300 | 19.15929500 |
| H  | -9.28233200 | -33.90076100 | 19.49677800 |
| H  | -9.10177500 | -33.64001000 | 21.23502600 |
| S  | -3.30326100 | -28.88951100 | 12.09333900 |
| C  | -2.24681400 | -29.96854400 | 13.12016900 |
| C  | -2.67593600 | -27.25289000 | 12.60525200 |
| H  | -1.66048300 | -27.11551100 | 12.22389700 |
| H  | -3.33126400 | -26.49873400 | 12.16211500 |
| H  | -2.69437000 | -27.18634800 | 13.69694400 |
| H  | -2.40453500 | -29.72713000 | 14.17393400 |
| H  | -2.55207100 | -30.99510900 | 12.91254800 |
| H  | -1.20361600 | -29.81686800 | 12.83055600 |
| H  | 0.29032500  | -32.28110400 | 21.20457100 |
| H  | -0.95005600 | -33.49233400 | 21.55895800 |
| Mg | -5.30131100 | -30.45798500 | 17.09021300 |

**The optimizations without any aotm constraints**

**React<sub>Ni(II),III,nofix</sub>**

|   |               |                |               |
|---|---------------|----------------|---------------|
| C | -7.3695605555 | -36.8552245474 | 17.3955954538 |
| C | -5.9477761639 | -36.3345432849 | 17.6711825292 |
| C | -5.6867151161 | -34.9855203784 | 17.0856325335 |
| N | -5.5612042137 | -34.7748007425 | 15.7225864364 |
| C | -5.5418203676 | -33.7413600558 | 17.6458068553 |
| C | -5.3118985223 | -33.4559976021 | 15.5163428839 |
| N | -5.3046586402 | -32.8023736461 | 16.6611139781 |
| C | 0.3518412081  | -32.5997073424 | 21.0507156955 |
| C | -0.6130023328 | -33.4177330700 | 20.1735977021 |
| C | -1.3478943739 | -32.5922797506 | 19.1668808462 |
| N | -0.7142569910 | -31.9277692546 | 18.1241607218 |
| C | -2.6791291533 | -32.3004259296 | 19.0008835720 |
| C | -1.6552123432 | -31.2854484747 | 17.3826081749 |
| N | -2.8524978902 | -31.4984388511 | 17.8924574580 |
| C | -3.4088227508 | -25.3515231345 | 19.9638590031 |

|   |                |                |               |
|---|----------------|----------------|---------------|
| C | -3.4796234964  | -26.7206302407 | 19.2798760859 |
| C | -2.7029937742  | -26.7649292768 | 17.9627501376 |
| C | -2.8066406936  | -28.0781545615 | 17.1635166297 |
| O | -1.9120486810  | -28.2872330902 | 16.3014930488 |
| O | -3.8250399611  | -28.7997819737 | 17.3949869791 |
| C | -10.5015143579 | -25.3739725650 | 16.0155610161 |
| C | -10.3167639166 | -26.4689858473 | 17.0819481776 |
| C | -9.2090690598  | -27.4459563877 | 16.7461362568 |
| C | -7.8836392182  | -27.2168377566 | 17.1455890090 |
| C | -9.4551254389  | -28.6034587783 | 15.9916061118 |
| C | -6.8516994262  | -28.0960915230 | 16.8270145283 |
| C | -8.4392377084  | -29.4981171221 | 15.6649099828 |
| C | -7.1007146828  | -29.2819882054 | 16.0840538568 |
| O | -6.1602469307  | -30.1507878461 | 15.7777451724 |
| C | -9.6536538465  | -28.8435356671 | 20.1887968309 |
| C | -8.9916621182  | -30.2129807627 | 20.4349120097 |
| C | -7.5964325295  | -30.2855021918 | 19.9020914030 |
| N | -6.5415551896  | -29.5537631298 | 20.4351177330 |
| C | -7.0564325363  | -30.9310222715 | 18.8208712014 |
| C | -5.4382361419  | -29.7686112759 | 19.6716256317 |
| N | -5.7212765261  | -30.6043795356 | 18.6928390025 |
| C | -0.9758847422  | -37.2322145552 | 18.3170296101 |
| C | -2.4298300685  | -37.0204924365 | 17.8636282697 |
| C | -2.5342451153  | -36.3306447494 | 16.5194556950 |
| C | -2.2822474225  | -34.9546095988 | 16.4101721679 |
| C | -2.8760566440  | -37.0210837157 | 15.3515110086 |
| C | -2.3757513135  | -34.2826629813 | 15.1965598722 |
| C | -2.9840948784  | -36.3651043826 | 14.1216311360 |
| C | -2.7470895619  | -34.9849862863 | 14.0345442377 |
| O | -2.9349027505  | -34.3790328124 | 12.8431000896 |
| C | -4.5090102879  | -28.6469067910 | 13.9761125020 |
| C | -4.6894029519  | -30.0218285613 | 13.3404754116 |
| C | -3.6369563496  | -31.0352686954 | 13.8153446486 |
| O | -3.4051781408  | -31.1044158232 | 15.0588498256 |
| O | -3.0724519706  | -31.7332848711 | 12.9293170407 |
| H | -5.7741143731  | -36.2775655156 | 18.7513550917 |
| H | -5.2093397063  | -37.0428043825 | 17.2744382585 |
| H | -5.6018080355  | -33.4556880763 | 18.6844927504 |
| H | -5.1177138454  | -33.0315902325 | 14.5463018030 |
| H | -7.5147825443  | -37.8483713701 | 17.8333498759 |
| H | -0.0586840652  | -34.2193447448 | 19.6654104282 |
| H | -1.3571286744  | -33.9169943971 | 20.8027319834 |
| H | -3.5199871500  | -32.6241990319 | 19.5939018028 |
| H | -1.4631812127  | -30.6628603582 | 16.5223675451 |



|   |                |                |               |
|---|----------------|----------------|---------------|
| H | 0.8623306572   | -33.2417062208 | 21.7756824913 |
| H | -4.5220630905  | -26.9934747239 | 19.0835941491 |
| H | -3.0772033695  | -27.4887762938 | 19.9555393987 |
| H | -3.0765320313  | -25.9698336714 | 17.2970141301 |
| H | -1.6400872269  | -26.5484477182 | 18.1202825323 |
| H | -2.3727699936  | -25.0678547296 | 20.1849719800 |
| H | -10.1088588456 | -25.9936827429 | 18.0504081700 |
| H | -11.2641548121 | -27.0110261043 | 17.2048245988 |
| H | -7.6568005759  | -26.3276034191 | 17.7354885470 |
| H | -10.4731498839 | -28.8138331831 | 15.6635311480 |
| H | -5.8387643993  | -27.9278091706 | 17.1756784780 |
| H | -8.6532086107  | -30.4028787603 | 15.1004357922 |
| H | -10.7428886743 | -25.8188324624 | 15.0437852973 |
| H | -9.5763496357  | -30.9968564189 | 19.9423390314 |
| H | -9.0014234114  | -30.4483550224 | 21.5089612552 |
| H | -7.5378321208  | -31.5650296433 | 18.0939695851 |
| H | -4.4838900509  | -29.2918855489 | 19.8151864831 |
| H | -10.6789982574 | -28.8327966979 | 20.5736625249 |
| H | -2.9572631186  | -36.4211878141 | 18.6187350415 |
| H | -2.9422997240  | -37.9902622836 | 17.8262825774 |
| H | -3.0706628322  | -38.0914268481 | 15.3998717239 |
| H | -2.0452164951  | -34.3857774418 | 17.3052098709 |
| H | -3.2595074376  | -36.9027471841 | 13.2186571732 |
| H | -2.2470585410  | -33.2055742148 | 15.1495013287 |
| H | -2.8742204292  | -33.3901654224 | 12.9291464547 |
| H | -0.4476950602  | -36.2737637390 | 18.3677518873 |
| H | -4.1859118115  | -28.7229511380 | 15.0151033234 |
| H | -5.4082597634  | -28.0290320006 | 13.9092033329 |
| H | -5.6528857222  | -30.3760816322 | 13.7225054970 |
| H | -4.7148345714  | -29.9899231002 | 12.2467214067 |
| H | -5.3950823172  | -35.4970702834 | 15.0340221314 |
| H | -6.5979108522  | -28.9292725750 | 21.2249385405 |
| H | 0.2750363471   | -31.9388450148 | 17.9282175107 |
| H | -11.3072696471 | -24.6790632865 | 16.2829453624 |
| H | -9.5789343719  | -24.7955657318 | 15.8923872451 |
| H | -3.8334219319  | -24.5698703786 | 19.3221772819 |
| H | -3.9645371352  | -25.3421209479 | 20.9084541460 |
| H | -0.4353108519  | -37.8667446260 | 17.6065858363 |
| H | -0.9256301346  | -37.7027305303 | 19.3059565786 |
| H | -7.5596493827  | -36.9297088288 | 16.3195826020 |
| H | -8.1197138275  | -36.1791396884 | 17.8181339528 |
| H | -9.1011569376  | -28.0387426084 | 20.6882572992 |
| H | -9.6707641445  | -28.6146790632 | 19.1197139057 |
| S | -3.2258642394  | -27.6933288847 | 13.0401288426 |

|    |               |                |               |
|----|---------------|----------------|---------------|
| C  | -1.7194615160 | -28.6933602499 | 13.2754853008 |
| C  | -2.8917104952 | -26.2868475896 | 14.1468014528 |
| H  | -2.2350187517 | -25.5941683988 | 13.6162950874 |
| H  | -3.8491512450 | -25.8057482742 | 14.3584530189 |
| H  | -2.4252639912 | -26.6791395610 | 15.0553204219 |
| H  | -1.6405174134 | -28.9227420603 | 14.3423102329 |
| H  | -1.8254496369 | -29.5932112114 | 12.6664331936 |
| H  | -0.8824549731 | -28.0853747640 | 12.9249064998 |
| H  | 1.1202083425  | -32.1055614176 | 20.4451137277 |
| H  | -0.1883076946 | -31.8209227160 | 21.5983698589 |
| Ni | -4.5952756839 | -30.7785157534 | 16.8867233408 |

**TS<sub>Ni(II),III,nofix</sub>**

|   |              |              |             |
|---|--------------|--------------|-------------|
| C | -7.08200300  | -37.09100800 | 17.35433700 |
| C | -5.73386500  | -36.41429900 | 17.65762800 |
| C | -5.61942200  | -35.03488300 | 17.09732100 |
| N | -5.63331800  | -34.77944200 | 15.73622900 |
| C | -5.48947500  | -33.80009300 | 17.68114000 |
| C | -5.47229200  | -33.44494000 | 15.54821700 |
| N | -5.39343300  | -32.82196300 | 16.70930400 |
| C | 0.28771000   | -32.47366900 | 21.13283200 |
| C | -0.72966700  | -33.32883000 | 20.35677800 |
| C | -1.44979800  | -32.57631000 | 19.28445800 |
| N | -0.80868300  | -32.02912600 | 18.17913100 |
| C | -2.77238700  | -32.25588600 | 19.10655700 |
| C | -1.73738600  | -31.42371900 | 17.39289400 |
| N | -2.93406300  | -31.54925700 | 17.93277500 |
| C | -3.24411100  | -25.27680100 | 19.78371800 |
| C | -3.43438100  | -26.66740000 | 19.17021500 |
| C | -2.60064100  | -26.87560200 | 17.90512600 |
| C | -2.79488800  | -28.21797700 | 17.17791800 |
| O | -1.89842800  | -28.56422100 | 16.37286600 |
| O | -3.89200500  | -28.82871400 | 17.40985200 |
| C | -10.46142000 | -25.26045200 | 16.13548100 |
| C | -10.29268700 | -26.32941700 | 17.22975400 |
| C | -9.23927900  | -27.35792200 | 16.87978600 |
| C | -7.88770800  | -27.14497600 | 17.18639500 |
| C | -9.57411800  | -28.53654800 | 16.19577300 |
| C | -6.90114000  | -28.06325700 | 16.82803000 |
| C | -8.60311500  | -29.46975100 | 15.83763400 |
| C | -7.24931100  | -29.24902600 | 16.15105500 |
| O | -6.32301000  | -30.16074800 | 15.79571800 |
| C | -9.93108000  | -29.10904300 | 20.08026400 |
| C | -9.15933700  | -30.41233600 | 20.35721000 |

|   |              |              |             |
|---|--------------|--------------|-------------|
| C | -7.75690500  | -30.37787100 | 19.84134800 |
| N | -6.79287700  | -29.50481600 | 20.33097000 |
| C | -7.13133100  | -31.04827200 | 18.82293600 |
| C | -5.65703200  | -29.66368300 | 19.60400900 |
| N | -5.83246600  | -30.59747300 | 18.68959100 |
| C | -0.53032100  | -36.84626100 | 18.07417000 |
| C | -2.03161000  | -36.86920100 | 17.73950100 |
| C | -2.35010300  | -36.18812700 | 16.42618600 |
| C | -2.27569300  | -34.79051900 | 16.32360400 |
| C | -2.70822100  | -36.90310200 | 15.27756500 |
| C | -2.53788100  | -34.12364800 | 15.13289100 |
| C | -2.99833300  | -36.25182600 | 14.07434600 |
| C | -2.92336300  | -34.85230400 | 13.99157700 |
| O | -3.27196800  | -34.25870500 | 12.83109700 |
| C | -4.34797400  | -28.42460100 | 14.05711100 |
| C | -4.91826400  | -29.66825200 | 13.66829300 |
| C | -4.06653100  | -30.90036300 | 13.91241000 |
| O | -3.60621100  | -31.07164500 | 15.08962900 |
| O | -3.86705400  | -31.67736300 | 12.94258800 |
| H | -5.57939600  | -36.35539400 | 18.74024900 |
| H | -4.91479000  | -37.02630800 | 17.25863900 |
| H | -5.46169600  | -33.55086600 | 18.72992400 |
| H | -5.38388800  | -32.98706100 | 14.57690300 |
| H | -7.11633600  | -38.09990700 | 17.77762500 |
| H | -0.22155200  | -34.20090000 | 19.92278400 |
| H | -1.48109500  | -33.72830300 | 21.04581400 |
| H | -3.61277100  | -32.48927600 | 19.74124900 |
| H | -1.53897700  | -30.87904000 | 16.48407200 |
| H | 0.78366700   | -33.06556400 | 21.90830000 |
| H | -4.48996800  | -26.83376900 | 18.92961400 |
| H | -3.15918300  | -27.43402600 | 19.90803800 |
| H | -2.84651700  | -26.09184900 | 17.17194800 |
| H | -1.53113000  | -26.76253700 | 18.11465800 |
| H | -2.19514800  | -25.09849900 | 20.04704900 |
| H | -10.03030400 | -25.83807400 | 18.17568200 |
| H | -11.25566900 | -26.82791000 | 17.39827400 |
| H | -7.60185100  | -26.23968900 | 17.72058400 |
| H | -10.61628600 | -28.72757000 | 15.94570300 |
| H | -5.85944900  | -27.91873800 | 17.09281200 |
| H | -8.86773600  | -30.38877100 | 15.32279100 |
| H | -10.75185700 | -25.72266100 | 15.18623000 |
| H | -9.66946400  | -31.25231600 | 19.87507800 |
| H | -9.16182300  | -30.62701500 | 21.43514300 |
| H | -7.52827700  | -31.79091900 | 18.14966800 |

|    |              |              |             |
|----|--------------|--------------|-------------|
| H  | -4.76208200  | -29.07592200 | 19.71605300 |
| H  | -10.95715100 | -29.17805200 | 20.45522900 |
| H  | -2.58449000  | -36.37367100 | 18.54966900 |
| H  | -2.38257800  | -37.90836100 | 17.71677500 |
| H  | -2.77017100  | -37.98905500 | 15.32072300 |
| H  | -2.03612200  | -34.20847700 | 17.20800100 |
| H  | -3.28659800  | -36.80960900 | 13.18817800 |
| H  | -2.53145100  | -33.03968400 | 15.09536000 |
| H  | -3.37362000  | -33.27286100 | 12.93853900 |
| H  | -0.16023000  | -35.81536300 | 18.10448600 |
| H  | -3.78369900  | -28.41968400 | 14.98376300 |
| H  | -4.89467100  | -27.51331600 | 13.82659500 |
| H  | -5.73379500  | -29.81790500 | 14.66408700 |
| H  | -5.45779600  | -29.68840700 | 12.72127000 |
| H  | -5.50527300  | -35.47321100 | 15.01218700 |
| H  | -6.92993600  | -28.82965800 | 21.06716600 |
| H  | 0.17780200   | -32.08577300 | 17.97808900 |
| H  | -11.22703700 | -24.52506600 | 16.40743100 |
| H  | -9.51919500  | -24.72806400 | 15.96776900 |
| H  | -3.54309300  | -24.49268800 | 19.07825500 |
| H  | -3.84194900  | -25.15083400 | 20.69311200 |
| H  | 0.04651900   | -37.37706400 | 17.30978300 |
| H  | -0.32572000  | -37.31190100 | 19.04506900 |
| H  | -7.24662800  | -37.17574000 | 16.27494100 |
| H  | -7.91232200  | -36.51295800 | 17.77181800 |
| H  | -9.45461500  | -28.25188500 | 20.56958100 |
| H  | -9.95618500  | -28.90107400 | 19.00783900 |
| S  | -2.49976500  | -27.85512600 | 12.80255400 |
| C  | -1.44942100  | -29.28228300 | 13.23424900 |
| C  | -1.77960900  | -26.58439400 | 13.89573200 |
| H  | -0.79860400  | -26.29059900 | 13.51319000 |
| H  | -2.44720500  | -25.71927100 | 13.87700600 |
| H  | -1.69473100  | -26.99545400 | 14.90643400 |
| H  | -1.52777900  | -29.45701300 | 14.30901900 |
| H  | -1.82808700  | -30.14137200 | 12.67762100 |
| H  | -0.42110600  | -29.06296700 | 12.93647600 |
| H  | 1.06515300   | -32.07743000 | 20.47027200 |
| H  | -0.20566300  | -31.62159900 | 21.61020200 |
| Ni | -4.65196400  | -30.79532600 | 16.93722700 |

**Optimizations with the model built from the crystal structure of free *Pu*DddK  
(PDB code: 6A53)**

**React<sub>Ni(II),III,PDB</sub>**

|   |               |                |               |
|---|---------------|----------------|---------------|
| C | 13.4720000000 | -15.1850000000 | -7.5700000000 |
|---|---------------|----------------|---------------|

|   |               |                |               |
|---|---------------|----------------|---------------|
| C | 12.3578569519 | -14.2109818131 | -7.1278221919 |
| C | 11.7744580082 | -14.4270664723 | -5.7528033403 |
| N | 10.4514689897 | -14.1072605368 | -5.4694607656 |
| C | 12.3030251412 | -14.7777423559 | -4.5313153837 |
| C | 10.2468429968 | -14.2417824675 | -4.1308722790 |
| N | 11.3477901662 | -14.6491601093 | -3.5360293090 |
| C | 18.1830000000 | -16.1620000000 | -2.3160000000 |
| C | 17.4270460994 | -14.8153372318 | -2.2614765632 |
| C | 15.9988430009 | -14.9200328150 | -1.8103432245 |
| N | 15.6141862379 | -15.6811097016 | -0.7144914319 |
| C | 14.8307242535 | -14.3418882843 | -2.2533129008 |
| C | 14.2737458312 | -15.5379284827 | -0.5377075514 |
| N | 13.7693297235 | -14.7394377042 | -1.4606291928 |
| C | 12.8120000000 | -16.1570000000 | 4.5340000000  |
| C | 12.8605311582 | -15.6176373600 | 3.1051686716  |
| C | 12.2708057441 | -14.2091894351 | 2.9980413452  |
| C | 12.2638129100 | -13.6473310730 | 1.5758005431  |
| O | 11.9794685655 | -14.4965971605 | 0.6689386585  |
| O | 12.4919171843 | -12.4259412426 | 1.4106528286  |
| C | 6.4940000000  | -13.6480000000 | 5.0950000000  |
| C | 6.2738762533  | -14.5109594355 | 3.8176048648  |
| C | 7.2046429068  | -14.3459255965 | 2.6114739612  |
| C | 8.4000680103  | -15.0785065893 | 2.4780374176  |
| C | 6.8338346425  | -13.5913280892 | 1.4862689796  |
| C | 9.1745148643  | -15.0647657675 | 1.3153431781  |
| C | 7.5978856646  | -13.5618525212 | 0.3137825878  |
| C | 8.8126360095  | -14.2925532609 | 0.1753705566  |
| O | 9.5049065582  | -14.2643800337 | -0.9596491345 |
| C | 9.2350000000  | -17.9460000000 | -5.2780000000 |
| C | 9.1541196791  | -18.5621526074 | -3.8641006177 |
| C | 10.1698829216 | -17.9749834190 | -2.9362792399 |
| N | 11.5314766024 | -18.2183362778 | -3.0699917385 |
| C | 10.0827767094 | -17.0231802393 | -1.9533702007 |
| C | 12.1938825602 | -17.4129080888 | -2.1985282726 |
| N | 11.3458122056 | -16.6707266847 | -1.5109014773 |
| C | 18.5200000000 | -11.6570000000 | -5.0030000000 |
| C | 17.3862365343 | -11.7367458991 | -6.0411820733 |
| C | 16.0884268037 | -11.1667746965 | -5.5099209250 |
| C | 15.9838699738 | -9.7991111937  | -5.2188038251 |
| C | 14.9778792452 | -11.9739010853 | -5.2346689708 |
| C | 14.8270421827 | -9.2568376956  | -4.6682936635 |
| C | 13.8090250293 | -11.4542515145 | -4.6765606349 |
| C | 13.7297598058 | -10.0818456721 | -4.3878009040 |
| O | 12.6238776311 | -9.5123001576  | -3.8477784672 |

|   |               |                |               |
|---|---------------|----------------|---------------|
| H | 12.7520629666 | -13.1857551874 | -7.1704568038 |
| H | 11.5416019503 | -14.2524053933 | -7.8614410720 |
| H | 13.3062981435 | -15.0966030774 | -4.2983549183 |
| H | 9.3204940936  | -14.0300190322 | -3.6181985717 |
| H | 13.8296237628 | -14.9179310187 | -8.5684147834 |
| H | 17.9747083441 | -14.1260760184 | -1.6026434686 |
| H | 17.4287501170 | -14.3482781667 | -3.2519852069 |
| H | 14.6941642420 | -13.6358683449 | -3.0580739359 |
| H | 13.6993370331 | -15.9955400995 | 0.2520524684  |
| H | 19.2021324139 | -16.0130015382 | -2.6845708727 |
| H | 13.9019147184 | -15.6022754900 | 2.7505541439  |
| H | 12.3089917203 | -16.2784718318 | 2.4274907414  |
| H | 12.8016039035 | -13.5085828470 | 3.6517322279  |
| H | 11.2198154476 | -14.2320698699 | 3.3209012420  |
| H | 13.3722989873 | -15.5130323549 | 5.2227124985  |
| H | 6.3053656171  | -15.5653559192 | 4.1239982609  |
| H | 5.2451954782  | -14.3374541248 | 3.4744023326  |
| H | 8.7231244842  | -15.7141959866 | 3.3034774904  |
| H | 5.8957087299  | -13.0360788192 | 1.5062862690  |
| H | 10.0850700868 | -15.6482141412 | 1.2564638988  |
| H | 7.2329221620  | -12.9978634970 | -0.5425632213 |
| H | 6.4045654454  | -12.5793663292 | 4.8689578711  |
| H | 9.2710166565  | -19.6532611079 | -3.9269361065 |
| H | 8.1616751966  | -18.3826296867 | -3.4381594475 |
| H | 9.2223326151  | -16.4880611388 | -1.5829084697 |
| H | 13.2694401794 | -17.3748537362 | -2.1256801919 |
| H | 8.4722983811  | -18.3731327630 | -5.9374160765 |
| H | 17.6941028966 | -11.1966808548 | -6.9472805680 |
| H | 17.2363157470 | -12.7815740765 | -6.3422220228 |
| H | 16.8267417885 | -9.1435090036  | -5.4302771394 |
| H | 15.0254537877 | -13.0407896514 | -5.4531980317 |
| H | 14.7473194887 | -8.1946972180  | -4.4556094462 |
| H | 12.9643347909 | -12.0924428333 | -4.4391026864 |
| H | 11.8877783372 | -10.1833865529 | -3.8281635477 |
| H | 18.2517469168 | -12.2060504641 | -4.0933644404 |
| H | 11.9548303755 | -18.8783097585 | -3.7044386969 |
| H | 9.7968169923  | -13.6959477480 | -6.1175528765 |
| H | 16.2278241480 | -16.2202974705 | -0.1232106498 |
| H | 5.7493770176  | -13.9024482912 | 5.8571036797  |
| H | 7.4907904678  | -13.8164267858 | 5.5180828354  |
| H | 11.7785706924 | -16.2050881636 | 4.8976691025  |
| H | 13.2352587516 | -17.1659107594 | 4.6037680171  |
| H | 10.2156210391 | -18.1253114044 | -5.7327278615 |
| H | 9.0912646033  | -16.8622894435 | -5.2293128294 |

|    |               |                |               |
|----|---------------|----------------|---------------|
| H  | 14.3259083849 | -15.1413419407 | -6.8849933990 |
| H  | 13.1100745957 | -16.2181340580 | -7.5929743590 |
| H  | 18.7117818852 | -10.6192745095 | -4.7115647581 |
| H  | 19.4544976225 | -12.0765480924 | -5.3942442621 |
| H  | 17.6771043473 | -16.8704524328 | -2.9797231778 |
| H  | 18.2606082474 | -16.6250383576 | -1.3253850594 |
| C  | 10.0015136443 | -11.1925275378 | -0.0318498865 |
| C  | 9.6212133891  | -11.3049918198 | -1.4961201589 |
| C  | 10.7899704677 | -11.6925354385 | -2.4052955333 |
| O  | 11.7300127032 | -12.3868359243 | -1.9124012834 |
| O  | 10.7267545365 | -11.2825518679 | -3.5971810680 |
| H  | 10.6401895255 | -12.0172721566 | 0.2848492874  |
| H  | 9.1277569220  | -11.1112625588 | 0.6209351676  |
| H  | 8.9246048542  | -12.1457143256 | -1.5572637787 |
| H  | 9.1280341248  | -10.4085929202 | -1.8841722604 |
| S  | 10.9576249802 | -9.6432857252  | 0.2978511550  |
| C  | 12.6219910968 | -9.9601709216  | -0.3881354429 |
| C  | 11.2626048045 | -9.8083857847  | 2.0864051628  |
| H  | 11.8735950785 | -8.9570922204  | 2.3952694806  |
| H  | 10.2895599936 | -9.7671013641  | 2.5812520877  |
| H  | 11.7667735964 | -10.7674871852 | 2.2538856006  |
| H  | 12.8913493317 | -10.9907228957 | -0.1476280293 |
| H  | 12.5847123119 | -9.7817157857  | -1.4648652499 |
| H  | 13.2816608317 | -9.2311508446  | 0.0902088115  |
| Ni | 11.5614004069 | -14.4316254671 | -1.3128537501 |

### **TS<sub>Ni(II),III,PDB</sub>**

|   |             |              |             |
|---|-------------|--------------|-------------|
| C | 13.47201800 | -15.18498300 | -7.56999300 |
| C | 12.53993500 | -14.05987800 | -7.08689400 |
| C | 11.91174300 | -14.26009200 | -5.73352000 |
| N | 10.66340300 | -13.72858000 | -5.43891700 |
| C | 12.34140600 | -14.79356700 | -4.53920800 |
| C | 10.40569000 | -13.92613700 | -4.12001000 |
| N | 11.40010200 | -14.57084900 | -3.54481800 |
| C | 18.18302000 | -16.16162700 | -2.31613900 |
| C | 17.43268300 | -14.81591000 | -2.22580900 |
| C | 16.00637800 | -14.94318400 | -1.78320200 |
| N | 15.63337000 | -15.72257400 | -0.69661300 |
| C | 14.82909600 | -14.39461500 | -2.23778400 |
| C | 14.28991000 | -15.61889700 | -0.53334000 |
| N | 13.77536400 | -14.83141300 | -1.45917400 |
| C | 12.81207800 | -16.15697000 | 4.53382500  |
| C | 12.91130700 | -15.67692800 | 3.08575600  |
| C | 12.66665100 | -14.17065600 | 2.94586400  |

|   |             |              |             |
|---|-------------|--------------|-------------|
| C | 12.70277400 | -13.68560300 | 1.49244700  |
| O | 12.00322700 | -14.40339800 | 0.69295300  |
| O | 13.35279200 | -12.66178000 | 1.20021300  |
| C | 6.49400100  | -13.64800200 | 5.09500100  |
| C | 6.63079900  | -14.77917500 | 4.04870500  |
| C | 7.45693800  | -14.48627700 | 2.80046700  |
| C | 8.51852900  | -15.32344000 | 2.41777900  |
| C | 7.13646200  | -13.44059500 | 1.92195200  |
| C | 9.22938500  | -15.14111100 | 1.22917500  |
| C | 7.83420400  | -13.24372000 | 0.72635700  |
| C | 8.89917900  | -14.09200900 | 0.35392500  |
| O | 9.56345800  | -13.88187400 | -0.81854000 |
| C | 9.23502000  | -17.94597100 | -5.27797300 |
| C | 8.88370900  | -18.29696400 | -3.81609300 |
| C | 9.89003900  | -17.76139300 | -2.84849700 |
| N | 11.20404600 | -18.21158600 | -2.81545700 |
| C | 9.86153300  | -16.71125500 | -1.96859400 |
| C | 11.90100200 | -17.42583700 | -1.95392600 |
| N | 11.11867500 | -16.50185300 | -1.42807000 |
| C | 18.51986300 | -11.65744700 | -5.00272100 |
| C | 17.40432500 | -11.82642400 | -6.04964900 |
| C | 16.10066800 | -11.21886100 | -5.58334200 |
| C | 15.96002400 | -9.82620100  | -5.49317000 |
| C | 15.02796100 | -12.00734200 | -5.15000200 |
| C | 14.80527700 | -9.24350400  | -4.98184800 |
| C | 13.86367400 | -11.44659000 | -4.62050000 |
| C | 13.74660500 | -10.04858600 | -4.53241200 |
| O | 12.65532100 | -9.43117500  | -4.02642200 |
| H | 13.10221800 | -13.11645700 | -7.06280800 |
| H | 11.73899100 | -13.91966400 | -7.82454100 |
| H | 13.26877100 | -15.29930800 | -4.32129100 |
| H | 9.52500000  | -13.56190700 | -3.61532000 |
| H | 13.88561900 | -14.93873000 | -8.55174500 |
| H | 17.97527700 | -14.14700700 | -1.54340800 |
| H | 17.43686300 | -14.31941500 | -3.20127600 |
| H | 14.67543900 | -13.68525700 | -3.03472600 |
| H | 13.72541300 | -16.07905900 | 0.26188300  |
| H | 19.20445100 | -16.00701400 | -2.67524200 |
| H | 13.90793700 | -15.91974800 | 2.68757000  |
| H | 12.18368100 | -16.20174000 | 2.45768400  |
| H | 13.39586600 | -13.59838800 | 3.52827500  |
| H | 11.66588900 | -13.93913900 | 3.33642200  |
| H | 13.54058400 | -15.64533600 | 5.17359000  |
| H | 7.05366800  | -15.66238700 | 4.54299700  |



|   |             |              |             |
|---|-------------|--------------|-------------|
| H | 5.61889400  | -15.07360600 | 3.73477200  |
| H | 8.79819600  | -16.15161500 | 3.06713400  |
| H | 6.30798400  | -12.77549800 | 2.15822600  |
| H | 10.06334900 | -15.78092900 | 0.97369600  |
| H | 7.54528600  | -12.43838800 | 0.05708500  |
| H | 6.03621400  | -12.75450400 | 4.65742600  |
| H | 8.78508500  | -19.38599200 | -3.70956600 |
| H | 7.90882900  | -17.87250500 | -3.55699700 |
| H | 9.05170300  | -16.04182900 | -1.72595000 |
| H | 12.95846900 | -17.53485600 | -1.77251500 |
| H | 8.47051500  | -18.32164000 | -5.96514700 |
| H | 17.72559600 | -11.36122000 | -6.99118700 |
| H | 17.26207400 | -12.89300400 | -6.26567300 |
| H | 16.77394000 | -9.18604500  | -5.82835800 |
| H | 15.10451000 | -13.09218600 | -5.21824600 |
| H | 14.69631000 | -8.16503200  | -4.92085400 |
| H | 13.06134800 | -12.06949000 | -4.23974900 |
| H | 11.94117700 | -10.09640800 | -3.81513700 |
| H | 18.23659500 | -12.13187100 | -4.05653900 |
| H | 11.57488900 | -18.98931300 | -3.33952800 |
| H | 10.11550400 | -13.14362200 | -6.05181800 |
| H | 16.25868300 | -16.23747400 | -0.09642000 |
| H | 5.86715700  | -13.97315600 | 5.93161100  |
| H | 7.47387700  | -13.35837500 | 5.48905400  |
| H | 11.81540800 | -15.95294700 | 4.94199300  |
| H | 12.99231400 | -17.23455400 | 4.61813200  |
| H | 10.19537000 | -18.38364600 | -5.57178500 |
| H | 9.31634600  | -16.86162200 | -5.40071900 |
| H | 14.31080000 | -15.32143600 | -6.87885200 |
| H | 12.93886100 | -16.13806100 | -7.64483700 |
| H | 18.69763000 | -10.59784800 | -4.79349400 |
| H | 19.46356900 | -12.10039400 | -5.34177300 |
| H | 17.67738500 | -16.84858700 | -3.00200600 |
| H | 18.25442600 | -16.65365800 | -1.33930500 |
| C | 10.64194900 | -11.15527500 | 0.24499400  |
| C | 10.06138300 | -11.33216000 | -1.04814900 |
| C | 11.01482400 | -11.61212900 | -2.16902200 |
| O | 11.99551500 | -12.39937500 | -1.92465700 |
| O | 10.78790500 | -11.08936100 | -3.29674600 |
| H | 11.43449500 | -11.84692300 | 0.51405400  |
| H | 9.97752800  | -10.87617200 | 1.06065400  |
| H | 9.66508300  | -12.62828100 | -0.91934000 |
| H | 9.23954600  | -10.67145300 | -1.32293000 |
| S | 11.98292600 | -9.39047300  | 0.41183600  |

|    |             |              |             |
|----|-------------|--------------|-------------|
| C  | 13.37657400 | -9.94039100  | -0.63286400 |
| C  | 12.65403700 | -9.73982400  | 2.07066700  |
| H  | 13.46352600 | -9.03742300  | 2.28532300  |
| H  | 11.84388700 | -9.58852700  | 2.78856200  |
| H  | 13.01201700 | -10.77385900 | 2.09625900  |
| H  | 13.53759500 | -11.00880800 | -0.48019700 |
| H  | 13.11118500 | -9.72803400  | -1.66984800 |
| H  | 14.25456800 | -9.35187300  | -0.35350200 |
| Ni | 11.69278500 | -14.36279100 | -1.30175000 |
